# Supplementary material for: Controlling the Response: Predictive Modeling of a Highly Central, Pathogen-Targeted Core Response Module in Macrophage Activation
Source: PLoS One. 2011 Feb 14;6(2):e14673. doi: 10.1371/journal.pone.0014673 (PMC3038849; doi:10.1371/journal.pone.0014673)
Supplement: Table S1 — List of genes considered in network inference and response set analysis. Response group analysis, a 1 indicates that the gene was found to be differentially regulated (fold change 1.5) in the specified stimulus. (1.38 MB XLSX) [file pone.0014673.s002.xlsx]

## Sheet: Sheet1
Gene/Probe Information				Response Group Analysis (this study)										CLR Inferred Network Topology				Pathogen Target Information from Dyer, et al.2008 PLoS CB 4(2):e32							MGI Homology Information	NCBI Homologene Database Information
ProbeID	Refseq	Symbol	Description	LPS	CpG	PAM2	PAM3	PIC	R848	N10	N300	STM	sum	Degree	Betweenness	ClusteringCoefficient	Closeness	HumanSymbol	Human annotation	Degree (Human PPI network)	BetweennessCentrality (Human PPI network)	BacterialGroups	ViralGroups	BothGroups	Human homology MGI	Homo sapiens	NCBIHomologeneGroup	HomologSum	Arabidopsis thaliana	Oryza sativa	Schizosaccharomyces pombe	Saccharomyces cerevisiae	Neurospora crassa	Plasmodium falciparum	Caenorhabditis elegans	Anopheles gambiae	Drosophila melanogaster	Danio rerio	Gallus gallus	Pan troglodytes	Canis lupus	Bos taurus	Rattus norvegicus	Kluyveromyces lactis	Eremothecium gossypii	Magnaporthe grisea
1419561_at	NM_011337	Ccl3	chemokine (C-C motif) ligand 3	1	1	1	1	1	1	1	1	1	9	86	60008.3	0.232997	0.00524395	CCL3	Small-inducible cytokine A3 precursor (CCL3) (Macrophage inflammatory protein 1-alpha) (MIP-1-alpha) (Tonsillar lymphocyte LD78 alpha protein) (G0/G1 switch regulatory protein 19-1) (G0S19-1 protein) (SIS-beta) (PAT 464.1) [Contains: MIP-1-alpha(4-69) (LD78-alpha(4- 69))].	9	9.39e-05	0	1	1	1	1	Homologene group 2242	5	0	1	1	0	0	0	0	0	1	0	0	0	0	0	0	1	0	1
1421578_at	AF128218	Ccl4	chemokine (C-C motif) ligand 4	1	1	1	1	1	1	1	1	1	9	2	0	NA	0.00519162	CCL4	Small-inducible cytokine A4 precursor (CCL4) (Macrophage inflammatory protein 1-beta) (MIP-1-beta) (MIP-1-beta(1-69)) (T-cell activation protein 2) (ACT-2) (PAT 744) (H400) (SIS-gamma) (Lymphocyte activation gene 1 protein) (LAG-1) (HC21) (G-26 T-lymphocyte-secreted protein) [Contains: MIP-1-beta(3-69)].	5	2.62e-06	0	1	1	1	1	Homologene group 48153	5	0	1	1	0	0	0	0	0	1	0	0	0	0	0	0	1	0	1
1417065_at	NM_007913	Egr1	early growth response 1	1	1	1	1	1	1	1	1	1	9	53	1349.28	0.421505	0.00522404	EGR1	Early growth response protein 1 (EGR-1) (Protein Krox-24) (Transcription factor Zif268) (Nerve growth factor-induced protein A) (NGFI-A) (Transcription factor ETR103) (Zinc finger protein 225) (AT225).	13	0.000439139	0	1	1	1	1	Homologene group 56394	6	0	1	1	0	0	0	0	0	1	0	1	0	0	0	0	1	0	1
1427683_at	X06746	Egr2	early growth response 2	1	1	1	1	1	1	1	1	1	9	10	0.863163	0.8	0.00521448	EGR2	Early growth response protein 2 (EGR-2) (Protein Krox-20) (AT591).	5	6.85e-06	0	1	1	1	0	Homologene group 20123	4	0	1	1	0	0	0	0	0	1	0	1	0	0	0	0	1	0	0
1423100_at	AV026617	Fos	FBJ osteosarcoma oncogene	1	1	1	1	1	1	1	1	1	9	1	0	NA	0.00519162	FOS	Proto-oncogene protein c-fos (Cellular oncogene fos) (G0/G1 switch regulatory protein 7).	55	0.000226853	0	2	2	1	1	Homologene group 3844	5	0	1	1	0	0	0	0	0	1	0	1	0	0	0	0	1	0	0
1423555_a_at	BB329808	Ifi44	interferon-induced protein 44	1	1	1	1	1	1	1	1	1	9	86	12294.9	0.445143	0.00518654	IFI44	Interferon-induced protein 44 (p44).	0	0	0	1	1	1	1	Homologene group 4683	5	0	1	1	0	0	0	0	0	1	0	1	0	0	0	0	1	0	0
1426276_at	AY075132	Ifih1	interferon induced with helicase C domain 1	1	1	1	1	1	1	1	1	1	9	48	12298.4	0.51954	0.00518454	IFIH1	Interferon-induced helicase C domain-containing protein 1 (EC 3.6.1.-) (Interferon-induced with helicase C domain protein 1) (Helicase with 2 CARD domains) (Helicard) (Melanoma differentiation-associated protein 5) (MDA-5) (RNA helicase-DEAD box protein 116) (Murabutide-down- regulated protein).	1	0	0	1	1	1	1	Homologene group 32535	5	0	1	1	0	0	0	0	0	1	0	1	0	0	0	0	0	0	1
1417409_at	NM_010591	Jun	Jun oncogene	1	1	1	1	1	1	1	1	1	9	105	48273.8	0.305172	0.00524091	JUN	Transcription factor AP-1 (Activator protein 1) (AP1) (Proto-oncogene c-jun) (V-jun avian sarcoma virus 17 oncogene homolog) (p39).	131	0.00193024	0	2	2	1	1	Homologene group 1679	6	0	1	1	0	0	0	0	0	1	0	1	0	0	0	0	1	0	1
1451905_a_at	M21039	Mx1	myxovirus (influenza virus) resistance 1	1	1	1	1	1	1	1	1	1	9	7	4487.98	0.428571	0.00516766	MX1	Interferon-induced GTP-binding protein Mx1 (Interferon-regulated resistance GTP-binding protein MxA) (Interferon-induced protein p78) (IFI-78K).	10	0.000253187	0	1	1	1
1425065_at	AB067535	Oas2	2'-5' oligoadenylate synthetase 2	1	1	1	1	1	1	1	1	1	9	3	1834.68	0.666667	0.00518924	OAS2	2'-5'-oligoadenylate synthetase 2 (EC 2.7.7.-) ((2-5')oligo(A) synthetase 2) (2-5A synthetase 2) (p69 OAS / p71 OAS) (p69OAS / p71OAS).	0	0	0	1	1	1	1	Homologene group 49478	4	0	1	1	0	0	0	0	0	1	0	0	0	0	0	0	1	0	0
1422139_at	NM_008873	Plau	plasminogen activator; urokinase	1	1	1	1	1	1	1	1	1	9	8	147.381	0.571429	0.00522954	PLAU	Urokinase-type plasminogen activator precursor (EC 3.4.21.73) (uPA) (U-plasminogen activator) [Contains: Urokinase-type plasminogen activator long chain A; Urokinase-type plasminogen activator short chain A; Urokinase-type plasminogen activator chain B].	17	5.36e-05	0	1	1	1	1	Homologene group 55670	5	0	1	1	0	0	0	0	0	1	0	1	0	0	0	0	0	0	1
1449984_at	NM_009140	Cxcl2	chemokine (C-X-C motif) ligand 2	1	1	1	1	1	1	1	1	1	9	119	120961	0.229915	0.00523624								1	0	Homologene group 117695	2	0	0	1	0	0	0	0	0	1	0	0	0	0	0	0	1	0	0
1448130_at	NM_010191	Fdft1	farnesyl diphosphate farnesyl transferase 1	1	1	1	1	1	1	1	1	1	9	43	96238.4	0.387464	0.00521584								1	1	Homologene group 3281	14	0	1	1	0	1	1	0	0	1	1	1	1	1	1	1	1	1	1
1451716_at	AW412521	Mafb	v-maf musculoaponeurotic fibrosarcoma oncogene family; protein B (avian)	1	1	1	1	1	1	1	1	1	9	125	69138.6	0.265614	0.0052416								1	1	Homologene group 31315	4	0	0	1	0	0	0	0	0	1	0	1	0	0	0	0	0	0	1
1418293_at	NM_008332	Ifit2	interferon-induced protein with tetratricopeptide repeats 2	1	1	1	1	1	1	1	1	1	9	72	32233.6	0.50202	0.00519194								1	0	Homologene group 1187	3	0	1	1	0	0	0	0	0	1	0	0	0	0	0	0	1	0	0
1450783_at	NM_008331	Ifit1	interferon-induced protein with tetratricopeptide repeats 1	1	1	1	1	1	1	1	1	1	9	67	31713.6	0.473976	0.00519199								1	0	Homologene group 22462	2	0	1	1	0	0	0	0	0	1	0	0	0	0	0	0	0	0	0
1424289_at	BB817847	Osgin2*	EST mapped to Osgin2: Oxidative stress induced growth inhibitor family member 2	1	1	1	1	1	1	1	1	1	9	25	13987.1	0.36	0.00523179
1418825_at	NM_008326	Ifi1	interferon inducible protein 1	1	1	1	1	1	1	1	1	1	9	10	12247.7	0	0.00521943
1423414_at	BB520073	Ptgs1	prostaglandin-endoperoxide synthase 1	1	1	1	1	1	1	1	1	1	9	30	9561.5	0.342529	0.00522759								1	1	Homologene group 743	6	0	1	1	0	0	0	0	0	1	0	1	0	0	0	0	1	0	1
1424609_a_at	BM225255	LOC233467 /// LOC434600 /// LOC434657	Follistatin-like 1	1	1	1	1	1	1	1	1	1	9	5	7368.21	0.666667	0.00517106
1433508_at	AV025472	Copeb	Core promoter element binding protein	1	1	1	1	1	1	1	1	1	9	34	4702.61	0.352381	0.00522723
1419515_at	NM_013710	Fgd2*	FYVE, RhoGEF and PH domain containing 2 (Fgd2), transcript variant 2	1	1	1	1	1	1	1	1	1	9	5	4190	0.333333	0.00519779
1451777_at	BC013672	Ddx60*	Ddx60; DEAD (Asp-Glu-Ala-Asp) box polypeptide 60	1	1	1	1	1	1	1	1	1	9	2	4190	0	0.00516018
1418392_a_at	NM_018734	Gbp4	guanylate nucleotide binding protein 4	1	1	1	1	1	1	1	1	1	9	30	3761.26	0.558824	0.00517771								1
1419665_a_at	NM_019738	Nupr1	nuclear protein 1	1	1	1	1	1	1	1	1	1	9	4	1377.27	0.333333	0.00520133								1	1	Homologene group 8229	4	0	1	1	0	0	0	0	0	1	0	0	0	0	0	0	1	0	0
1423078_a_at	AK005441	Sc4mol	sterol-C4-methyl oxidase-like	1	1	1	1	1	1	1	1	1	9	13	454.027	0.717949	0.00519335								1	1	Homologene group 90891	14	0	1	1	0	1	1	0	0	1	1	1	1	1	1	1	1	1	1
1424339_at	AB067533	Oasl1	2'-5' oligoadenylate synthetase-like 1	1	1	1	1	1	1	1	1	1	9	20	104.85	0.847368	0.00517815								1	1	Homologene group 2769	5	0	1	1	0	0	0	0	0	1	0	0	0	0	0	0	1	0	1
1422670_at	NM_009708	Rnd2*	Rho family GTPase 2 (Rnd2)	1	1	1	1	1	1	1	1	1	9	3	12.7464	0.333333	0.00522183
1426774_at	BM227980	Parp12*	poly (ADP-ribose) polymerase family, member 12 (Parp12)	1	1	1	1	1	1	1	1	1	9	10	4.24356	0.666667	0.00516671
1419254_at	BG076333	Mthfd2	methylenetetrahydrofolate dehydrogenase (NAD+ dependent); methenyltetrahydrofolate cyclohydrolase	1	1	1	1	1	1	1	1	1	9	6	0.359847	0.8	0.0051538								1	1	Homologene group 21321	8	0	1	1	1	0	0	1	0	1	0	1	0	0	0	0	1	0	1
1415964_at	NM_009127	Scd1	stearoyl-Coenzyme A desaturase 1	1	1	1	1	1	1	1	1	1	9	3	0	1	0.00518994									0	Homologene group 74538	6	0	1	1	0	0	0	1	0	1	0	1	0	0	0	0	1	0	1
1427102_at	AF099975	Slfn4	schlafen 4	1	1	1	1	1	1	1	1	1	9	3	0	1	0.00516644
1450971_at	AK010420	Gadd45b	growth arrest and DNA-damage-inducible 45 beta	1	1	1	1	1	1	1	1	1	9	2	0	NA	0.00517436								1	1	Homologene group 7433	4	0	1	1	0	0	0	0	0	1	0	0	0	0	0	0	1	0	0
1419676_at	BC007127	Mx2	myxovirus (influenza virus) resistance 2	1	1	1	1	1	1	1	1	1	9	1	0	NA	0.00520337								1
1425139_at	AV308638	Sesn2	sestrin 2	1	1	1	1	1	1	1	1	1	9	1	0	NA	0.00517029								1	1	Homologene group 12873	4	0	1	0	0	0	0	0	0	1	0	1	0	0	0	0	1	0	0
1417707_at	NM_133898	N4bp2l1*	NEDD4 binding protein 2-like 1 (N4bp2l1)	1	1	1	1	1	1	1	1	1	9
1417516_at	NM_007837	Ddit3	DNA-damage inducible transcript 3	1	1	1	1	1	1	1	1	1	9												1	0	Homologene group 3012	3	0	1	1	0	0	0	0	0	1	0	0	0	0	0	0	1	0	0
1423571_at	BB133079	S1pr1*	sphingosine-1-phosphate receptor 1 (S1pr1)	1	1	1	1	1	1	1	1	1	9
1418826_at	NM_027209	Ms4a6b	membrane-spanning 4-domains; subfamily A; member 6B	1	1	1	1	1	1	1	1	1	9												1	0	Homologene group 83320	3	0	1	1	0	0	0	0	0	1	0	0	0	0	0	0	1	0	0
1450484_a_at	AK004595	Tyki	thymidylate kinase family LPS-inducible member	1	1	1	1	1	1	1	1	1	9
1426708_at	BC003908	Antxr2	anthrax toxin receptor 2	1	1	1	1	1	1	0	1	1	8					ANTXR2	Anthrax toxin receptor 2 precursor (Capillary morphogenesis gene 2 protein) (CMG-2).	5	1.49e-05	1	0	1	1	1	Homologene group 43236	5	0	1	0	0	0	0	0	0	1	0	1	0	0	0	0	1	0	1
1448698_at	NM_007631	Ccnd1	cyclin D1	1	1	1	1	1	1	0	1	1	8	2	0	NA	0.00516924	CCND1	G1/S-specific cyclin-D1 (PRAD1 oncogene) (BCL-1 oncogene).	54	0.000277603	0	1	1	1	1	Homologene group 1334	7	0	1	1	1	0	0	1	0	1	0	1	0	0	0	0	0	0	1
1416896_at	NM_009097	Rps6ka1	ribosomal protein S6 kinase polypeptide 1	1	1	1	1	1	1	0	1	1	8					RPS6KA1	Ribosomal protein S6 kinase alpha-1 (EC 2.7.11.1) (S6K-alpha 1) (90 kDa ribosomal protein S6 kinase 1) (p90-RSK 1) (Ribosomal S6 kinase 1) (RSK-1) (pp90RSK1) (p90S6K) (MAP kinase-activated protein kinase 1a) (MAPKAPK1A).	29	0.000455	1	0	1	1	1	Homologene group 55703	5	1	1	1	0	0	0	0	0	1	0	1	0	0	0	0	0	0	0
1419132_at	NM_011905	Tlr2	toll-like receptor 2	1	1	1	1	1	1	0	1	1	8	1	0	NA	0.000228519	TLR2	Toll-like receptor 2 precursor (Toll/interleukin-1 receptor-like protein 4) (CD282 antigen).	27	0.00012482	3	0	3	1	1	Homologene group 20695	8	0	1	1	1	0	0	1	0	1	0	1	0	0	0	0	1	0	1
1416273_at	NM_009396	Tnfaip2	tumor necrosis factor; alpha-induced protein 2	1	1	1	1	1	1	0	1	1	8	56	82980.2	0.256494	0.00524413	TNFAIP2	Tumor necrosis factor, alpha-induced protein 2 (Primary response gene B94 protein).	0	0	1	0	1	1	1	Homologene group 4583	6	0	1	1	0	0	0	0	0	1	0	1	0	0	0	0	1	0	1
1417306_at	NM_018793	Tyk2	tyrosine kinase 2	1	1	1	1	1	1	0	1	1	8	23	4496.83	0.592885	0.00517774	TYK2	Non-receptor tyrosine-protein kinase TYK2 (EC 2.7.10.2).	29	8.12e-05	0	1	1	1	1	Homologene group 20712	3	0	1	0	0	0	0	0	0	1	0	0	0	0	0	0	1	0	0
1416401_at	NM_007656	Kai1	kangai 1 (suppression of tumorigenicity 6; prostate)	1	1	1	1	1	1	0	1	1	8	115	75378.3	0.287559	0.00524257
1423586_at	AA500897	Axl	AXL receptor tyrosine kinase	1	1	1	1	1	1	0	1	1	8	85	52503.3	0.262857	0.00524184								1	1	Homologene group 7583	3	0	1	1	0	0	0	0	0	1	0	0	0	0	0	0	0	0	0
1417023_a_at	NM_024406	Fabp4	fatty acid binding protein 4; adipocyte	1	1	1	1	1	1	0	1	1	8	22	32767.5	0.205128	0.00521531								1	1	Homologene group 36067	5	1	0	1	0	0	0	0	0	1	0	0	0	0	0	0	1	0	1
1425686_at	BE284491	Cflar	CASP8 and FADD-like apoptosis regulator	1	1	1	1	1	1	0	1	1	8	74	16348.6	0.277482	0.00523237								1	1	Homologene group 7652	6	0	1	1	0	0	0	0	0	1	0	1	0	0	0	0	1	0	1
1436393_a_at	BG065227	Trim37	tripartite motif protein 37	1	1	1	1	1	1	0	1	1	8	15	14934.3	0.142857	0.0052291								1	1	Homologene group 9084	7	0	1	1	0	0	0	1	0	1	0	1	0	0	0	0	1	0	1
1416442_at	NM_010499	Ier2	immediate early response 2	1	1	1	1	1	1	0	1	1	8	56	13100.4	0.349206	0.00522997								1	1	Homologene group 3607	3	0	1	1	0	0	0	0	0	1	0	0	0	0	0	0	0	0	0
1425271_at	AB000121	Psmc3ip	proteasome (prosome; macropain) 26S subunit; ATPase 3; interacting protein	1	1	1	1	1	1	0	1	1	8	2	11674.8	0	0.00521325								1	1	Homologene group 5940	6	0	1	1	0	0	0	0	0	1	0	1	0	1	0	0	1	0	0
1420591_at	NM_030720	Gpr84	G protein-coupled receptor 84	1	1	1	1	1	1	0	1	1	8	57	11176.5	0.326984	0.00522299								1	1	Homologene group 41370	6	0	1	1	1	0	0	0	0	1	0	1	0	0	0	0	1	0	0
1449117_at	NM_010592	Jund1	Jun proto-oncogene related gene d1	1	1	1	1	1	1	0	1	1	8	33	7974.76	0.247619	0.00522888
1448191_at	NM_011121	Plk1	polo-like kinase 1 (Drosophila)	1	1	1	1	1	1	0	1	1	8	11	2481.31	0.345455	0.00522687								1	1	Homologene group 3690	13	1	1	1	1	1	1	1	0	1	0	1	1	0	0	1	1	0	1
1418393_a_at	NM_008398	Itga7	integrin alpha 7	1	1	1	1	1	1	0	1	1	8	4	2376.38	0	0.00519653								1	1	Homologene group 37592	6	1	1	1	1	0	0	1	0	1	0	0	0	0	0	0	0	0	0
1426083_a_at	L16846	Btg1	B-cell translocation gene 1; anti-proliferative	1	1	1	1	1	1	0	1	1	8	23	2008.02	0.505495	0.00522139								1	1	Homologene group 37521	6	0	0	1	0	0	0	1	0	1	0	1	0	0	0	0	1	0	1
1417612_at	BF147705	Ier5	immediate early response 5	1	1	1	1	1	1	0	1	1	8	49	1626.74	0.637931	0.00517784								1	1	Homologene group 7778	3	0	0	1	0	0	0	0	0	1	0	1	0	0	0	0	0	0	0
1425745_a_at	BC004057	Tacc2	transforming; acidic coiled-coil containing protein 2	1	1	1	1	1	1	0	1	1	8	8	928.493	0.321429	0.00517032								1	1	Homologene group 5087	5	0	1	1	0	0	0	0	0	1	0	0	0	0	0	0	1	0	1
1420919_at	BB768208	Sgk3	serum/glucocorticoid regulated kinase 3	1	1	1	1	1	1	0	1	1	8	13	547.176	0.461538	0.00522623								1	1	Homologene group 56582	6	0	1	0	0	0	1	0	0	1	0	1	0	0	0	0	1	0	1
1417636_at	NM_008135	Slc6a9	solute carrier family 6 (neurotransmitter transporter; glycine); member 9	1	1	1	1	1	1	0	1	1	8	4	1.66403	0.833333	0.00519284								1	1	Homologene group 5050	5	0	1	1	0	0	0	0	0	1	0	1	0	0	0	0	0	0	1
1451340_at	BC027152	Arid5a	AT rich interactive domain 5A (Mrf1 like)	1	1	1	1	1	1	0	1	1	8	2	0	NA	0.00518657								1	1	Homologene group 34940	6	0	1	1	0	0	0	0	0	1	0	1	0	0	0	0	1	0	1
1418901_at	NM_009883	---	---	1	1	1	1	1	1	0	1	1	8	1	0	NA	0.00514967
1416544_at	NM_007971	Ezh2	enhancer of zeste homolog 2 (Drosophila)	1	1	1	1	1	1	0	1	1	8	1	0	NA	0.000228467								1	1	Homologene group 37926	8	0	1	1	1	0	0	1	0	1	0	1	0	0	0	0	1	0	1
1433543_at	BI690018	Anln	anillin; actin binding protein (scraps homolog; Drosophila)	1	1	1	1	1	1	0	1	1	8												1	1	Homologene group 41281	8	0	1	1	1	0	0	1	0	1	0	1	0	0	0	0	1	0	1
1424278_a_at	BC004702	Birc5	baculoviral IAP repeat-containing 5	1	1	1	1	1	1	0	1	1	8												1	1	Homologene group 37450	7	0	1	0	1	0	0	1	0	1	0	1	0	0	0	0	1	0	1
1415840_at	NM_134255	Elovl5	ELOVL family member 5; elongation of long chain fatty acids (yeast)	1	1	1	1	1	1	0	1	1	8												1	1	Homologene group 41449	14	0	1	1	0	1	1	0	0	1	1	1	1	1	1	1	1	1	1
1426530_a_at	BM120233	Klhl5	kelch-like 5 (Drosophila)	1	1	1	1	1	1	0	1	1	8													0	Homologene group 89241	0	0	0	0	0	0	0	0	0	0	0	0	0	0	0	0	1	0	0
1449153_at	BC019135	Mmp12	matrix metalloproteinase 12	1	1	1	1	1	1	0	1	1	8												1	1	Homologene group 20547	4	0	1	1	0	0	0	0	0	1	0	0	0	0	0	0	1	0	0
1415806_at	NM_008872	---	---	1	1	1	1	1	1	0	1	1	8
1417209_at	NM_021372	Sertad2	SERTA domain containing 2	1	1	1	1	1	1	0	1	1	8												1	1	Homologene group 8843	5	0	0	1	0	0	0	0	0	1	0	1	0	0	0	0	1	0	1
1415903_at	NM_134086	Slc38a1	solute carrier family 38; member 1	1	1	1	1	1	1	0	1	1	8												1	0	Homologene group 12745	6	0	1	1	0	0	0	0	0	1	0	0	0	1	0	0	1	1	1
1449363_at	BC019946	Atf3	activating transcription factor 3	1	1	1	1	1	1	1	1	0	8	4	103.062	0.666667	0.00517393	ATF3	Cyclic AMP-dependent transcription factor ATF-3 (Activating transcription factor 3).	20	0.000280967	0	1	1	1	1	Homologene group 1265	6	0	1	1	0	0	0	0	0	1	0	1	0	0	0	0	1	0	1
1452178_at	BI525140	Plec1	plectin 1	1	0	1	1	1	1	1	1	1	8	11	6069.4	0.142857	0.00521337	PLEC1	Plectin-1 (PLTN) (PCN) (Hemidesmosomal protein 1) (HD1) (Plectin-11).	17	8.19e-05	1	0	1	1	0	Homologene group 384	4	0	1	1	0	0	0	0	0	1	0	1	0	0	0	0	1	0	0
1417406_at	AF366401	Sertad1	SERTA domain containing 1	1	0	1	1	1	1	1	1	1	8	7	1876.4	0.380952	0.00522199	SERTAD1	SERTA domain-containing protein 1 (Transcriptional regulator interacting with the PHD-bromodomain 1) (TRIP-Br1) (CDK4-binding protein p34SEI1) (SEI-1).	5	0.000108381	0	2	2	1	1	Homologene group 8365	4	0	1	1	0	0	0	0	0	1	0	0	0	0	0	0	1	0	0
1422134_at	NM_008036	Fosb	FBJ osteosarcoma oncogene B	1	1	1	1	1	1	1	0	1	8	20	14208.4	0.309091	0.00522422								1	0	Homologene group 31403	4	0	1	1	0	0	0	0	0	1	0	1	0	0	0	0	1	0	0
1417061_at	AF226613	Slc40a1	solute carrier family 40 (iron-regulated transporter); member 1	1	1	1	1	1	1	1	1	0	8	5	12503.4	0.3	0.00523511								1	1	Homologene group 40959	7	0	1	0	0	0	0	0	0	1	0	1	0	1	0	0	1	1	1
1424672_at	BC020141	C630007L23Rik /// LOC328955	RIKEN cDNA C630007L23 gene /// similar to Dmx-like 1	1	1	0	1	1	1	1	1	1	8	4	8255.19	0	0.00518676
1451123_at	BC006740	C330016O10Rik	RIKEN cDNA C330016O10 gene	1	1	1	0	1	1	1	1	1	8	22	7934.47	0.125	0.00522689								1	1	Homologene group 17124	6	0	1	1	0	0	0	0	0	1	0	1	0	0	0	0	1	0	1
1452416_at	X53802	Il6ra	interleukin 6 receptor; alpha	1	0	1	1	1	1	1	1	1	8	5	673.863	0.666667	0.00518974								1	1	Homologene group 474	4	0	1	1	0	0	0	0	0	1	0	0	0	0	0	0	1	0	0
1428242_at	AK018130	6330406L22Rik	RIKEN cDNA 6330406L22 gene	1	1	0	1	1	1	1	1	1	8	36	30.5761	0.82381	0.0051456
1448894_at	NM_008012	Akr1b8	aldo-keto reductase family 1; member B8	1	1	0	1	1	1	1	1	1	8	2	0	NA	0.0051704								1	0	Homologene group 88507	2	0	0	1	0	0	0	0	0	1	0	0	0	0	0	0	1	0	0
1431724_a_at	AK013804	P2ry12	purinergic receptor P2Y; G-protein coupled 12	1	0	1	1	1	1	1	1	1	8	1	0	NA	0.00518974								1	1	Homologene group 11260	5	0	1	1	0	0	0	0	0	1	0	1	0	0	0	0	1	0	0
1450414_at	BC023427	Pdgfb	platelet derived growth factor; B polypeptide	1	1	0	1	1	1	1	1	1	8												1	1	Homologene group 74303	6	0	1	1	0	0	0	0	0	1	0	1	0	0	0	0	1	0	1
1451655_at	BC024709	Slfn8	schlafen 8	1	1	0	1	1	1	1	1	1	8
1451382_at	BC025169	1810008K03Rik	RIKEN cDNA 1810008K03 gene	1	0	1	1	1	1	1	1	1	8
1421821_at	AF425607	Ldlr	Low density lipoprotein receptor	1	0	1	1	1	1	1	1	1	8												1	1	Homologene group 55469	4	0	0	1	0	0	0	0	0	1	0	1	0	0	0	0	1	0	0
1420895_at	BM248342	Tgfbr1	transforming growth factor; beta receptor I	1	0	1	1	1	1	1	1	1	8												1	1	Homologene group 3177	8	0	1	1	1	0	0	1	0	1	0	1	0	0	0	0	1	0	1
1437067_at	BM228625	Phtf2	putative homeodomain transcription factor 2	1	1	1	1	1	1	1	0	1	8												1	1	Homologene group 10713	7	0	1	1	1	0	0	1	0	1	0	0	0	0	0	0	1	0	1
1425951_a_at	AF240358	Clec4n	C-type lectin domain family 4; member n	1	1	1	1	1	1	1	1	0	8												1	1	Homologene group 84615	2	0	0	0	0	0	0	0	0	1	0	0	0	0	0	0	1	0	0
1429012_at	BM246754	Arhgef6	Rac/Cdc42 guanine nucleotide exchange factor (GEF) 6	1	1	1	1	1	1	0	0	1	7					ARHGEF6	Rho guanine nucleotide exchange factor 6 (Rac/Cdc42 guanine nucleotide exchange factor 6) (PAK-interacting exchange factor alpha) (Alpha-Pix) (COOL-2).	75	0.000190138	0	1	1	1	1	Homologene group 3561	5	0	1	1	0	0	0	0	0	1	0	1	0	0	0	0	0	0	1
1457687_at	BI664467	Bcl2	B-cell leukemia/lymphoma 2	1	1	1	1	1	1	0	0	1	7	104	23523.9	0.315152	0.00523613	BCL2	Apoptosis regulator Bcl-2.	79	0.00158785	0	1	1	1	1	Homologene group 527	6	0	1	1	0	0	0	0	0	1	0	1	0	0	0	0	1	0	1
1422845_at	BI653492	Canx	calnexin	1	1	1	1	1	1	0	0	1	7	36	46287.3	0.3083	0.00522665	CANX	Calnexin precursor (Major histocompatibility complex class I antigen- binding protein p88) (p90) (IP90).	43	0.00141583	0	1	1	1	0	Homologene group 1324	15	1	1	1	1	1	1	1	0	1	1	1	0	1	1	1	1	1	1
1455886_at	BB385581	Cbl	Casitas B-lineage lymphoma	1	1	1	1	1	1	0	0	1	7	4	4190	0	0.00518427	CBL	E3 ubiquitin-protein ligase CBL (EC 6.3.2.-) (Signal transduction protein CBL) (Proto-oncogene c-CBL) (Casitas B-lineage lymphoma proto- oncogene) (RING finger protein 55).	110	0.00207275	0	1	1	1	1	Homologene group 3802	8	1	0	1	1	0	0	1	0	1	0	1	0	0	0	0	1	0	1
1421228_at	AF128193	Ccl7	chemokine (C-C motif) ligand 7	1	1	1	1	1	1	0	0	1	7					CCL7	Small-inducible cytokine A7 precursor (CCL7) (Monocyte chemotactic protein 3) (MCP-3) (Monocyte chemoattractant protein 3) (NC28).	16	0.000169299	0	2	2	1	0	Homologene group 4568	3	0	1	1	0	0	0	0	0	1	0	0	0	0	0	0	1	0	0
1421186_at	BB148128	Ccr2	chemokine (C-C motif) receptor 2	1	1	1	1	1	1	0	0	1	7	7	18304.5	0.1	0.00522466	CCR2	C-C chemokine receptor type 2 (C-C CKR-2) (CC-CKR-2) (CCR-2) (CCR2) (Monocyte chemoattractant protein 1 receptor) (MCP-1-R) (CD192 antigen).	9	1.17e-05	0	1	1	1	1	Homologene group 537	6	0	1	1	0	0	0	0	0	1	0	1	0	0	0	0	1	0	1
1419696_at	NM_013488	Cd4	CD4 antigen	1	1	1	1	1	1	0	0	1	7	18	9005.85	0.205128	0.00520732	CD4	T-cell surface glycoprotein CD4 precursor (T-cell surface antigen T4/Leu-3).	39	0.00148755	0	2	2	1	1	Homologene group 513	5	0	1	1	0	0	0	0	0	1	0	0	0	0	0	0	1	0	1
1450674_at	NM_007668	Cdk5	cyclin-dependent kinase 5	1	1	1	1	1	1	0	0	1	7	70	18445.7	0.353846	0.00523521	CDK5	Cell division protein kinase 5 (EC 2.7.11.22) (Cyclin-dependent kinase 5) (Tau protein kinase II catalytic subunit) (TPKII catalytic subunit) (Serine/threonine-protein kinase PSSALRE).	46	0.000483207	0	1	1	1	1	Homologene group 3623	14	1	1	1	1	1	1	1	0	1	1	1	1	0	1	1	1	0	0
1457854_at	BG069553	Cdkal1	CDK5 regulatory subunit associated protein 1-like 1	1	1	1	1	1	1	0	0	1	7					CDKAL1	Myotonic dystrophy kinase-related CDC42-binding protein kinase alpha (Fragment).	0	0	0	1	1	1	1	Homologene group 9830	12	1	1	1	1	0	0	1	1	1	0	1	0	1	0	0	1	1	1
1428064_at	BI248650	Centd2	centaurin; delta 2	1	1	1	1	1	1	0	0	1	7					CENTD2	Centaurin-delta 2 (Cnt-d2) (Arf-GAP, Rho-GAP, ankyrin repeat and pleckstrin homology domain-containing protein 1).	71	0.000161749	0	1	1
1427883_a_at	AW550625	Col3a1	procollagen; type III; alpha 1	1	1	1	1	1	1	0	0	1	7	15	10188.9	0.392857	0.00521744	COL3A1	Collagen alpha-1(III) chain precursor.	10	1.3e-05	0	1	1	1	1	Homologene group 55433	5	0	1	1	0	0	0	0	0	1	0	0	0	0	0	0	1	0	1
1449949_a_at	U90715	Cxadr	coxsackievirus and adenovirus receptor	1	1	1	1	1	1	0	0	1	7	118	41256.4	0.272831	0.00523855	CXADR	Coxsackievirus and adenovirus receptor precursor (Coxsackievirus B- adenovirus receptor) (hCAR) (CVB3-binding protein) (HCVADR).	3	0	0	1	1	1	1	Homologene group 1024	6	0	1	1	0	0	0	0	0	1	0	1	0	0	0	0	1	0	1
1449925_at	NM_009910	Cxcr3	chemokine (C-X-C motif) receptor 3	1	1	1	1	1	1	0	0	1	7	6	13034.8	0	0.00519955	CXCR3	C-X-C chemokine receptor type 3 (CXC-R3) (CXCR-3) (Interferon- inducible protein 10 receptor) (IP-10 receptor) (CKR-L2) (CD183 antigen) (G protein-coupled receptor 9).	9	1.76e-05	0	1	1	1	1	Homologene group 1153	5	0	1	1	0	0	0	0	0	1	0	1	0	0	0	0	1	0	0
1416751_a_at	NM_017397	Ddx20	DEAD (Asp-Glu-Ala-Asp) box polypeptide 20	1	1	1	1	1	1	0	0	1	7	12	4529.5	0.177778	0.00521393	DDX20	Probable ATP-dependent RNA helicase DDX20 (EC 3.6.1.-) (DEAD box protein 20) (DEAD box protein DP 103) (Component of gems 3) (Gemin-3).	42	0.000430036	0	1	1	1	1	Homologene group 5214	5	0	1	1	0	0	0	0	0	1	0	1	0	0	0	0	0	0	1
1460643_at	BC024894	Ell	elongation factor RNA polymerase II	1	1	1	1	1	1	0	0	1	7	16	13235.9	0.244444	0.00521804	ELL	RNA polymerase II elongation factor ELL (Eleven-nineteen lysine-rich leukemia protein).	47	0.000279247	0	1	1	1	1	Homologene group 4762	6	0	1	1	0	0	0	1	0	1	0	1	0	0	0	0	0	0	1
1451788_at	AF356627	F11	coagulation factor XI	1	1	1	1	1	1	0	0	1	7	2	0	NA	0.00519518	F11	Coagulation factor XI precursor (EC 3.4.21.27) (Plasma thromboplastin antecedent) (PTA) (FXI) [Contains: Coagulation factor XIa heavy chain; Coagulation factor XIa light chain].	17	5.69e-06	1	0	1	1	1	Homologene group 86654	4	0	0	1	0	0	0	0	0	1	0	0	0	0	0	0	1	0	1
1433528_at	BG075741	Gtf2a2	general transcription factor II A; 2	1	1	1	1	1	1	0	0	1	7	54	19325.9	0.339015	0.00524013	GTF2A2	Transcription initiation factor IIA gamma chain (TFIIA P12 subunit) (TFIIA-12) (TFIIAS) (TFIIA-gamma).	42	5.53e-06	0	1	1	1	1	Homologene group 3304	17	1	1	1	1	1	1	1	0	1	1	1	1	1	1	1	1	1	1
1417698_at	AV325174	Gtf2f1	general transcription factor IIF; polypeptide 1	1	1	1	1	1	1	0	0	1	7	16	28212.8	0.145455	0.00522669	GTF2F1	Transcription initiation factor IIF subunit alpha (EC 2.7.11.1) (TFIIF-alpha) (General transcription factor IIF subunit 1) (Transcription initiation factor RAP74) (General transcription factor IIF polypeptide 1 74 kDa subunit protein).	165	0.000777387	0	2	2	1	1	Homologene group 1585	10	1	1	1	1	0	0	1	0	1	0	1	0	1	0	0	1	1	0
1440220_at	AV304145	Gtf2h2	General transcription factor II H; polypeptide 2	1	1	1	1	1	1	0	0	1	7	16	1097.93	0.311111	0.0052106	GTF2H2	TFIIH basal transcription factor complex p44 subunit (Basic transcription factor 2 44 kDa subunit) (BTF2-p44) (General transcription factor IIH polypeptide 2).	98	0	0	1	1	1	1	Homologene group 1159	16	1	1	1	1	1	1	1	0	1	1	1	1	1	1	1	1	1	0
1422742_at	NM_007772	Hivep1	human immunodeficiency virus type I enhancer binding protein 1	1	1	1	1	1	1	0	0	1	7	9	9747.12	0.1	0.0051951	HIVEP1	Zinc finger protein 40 (Human immunodeficiency virus type I enhancer- binding protein 1) (HIV-EP1) (Major histocompatibility complex-binding protein 1) (MBP-1) (Positive regulatory domain II-binding factor 1) (PRDII-BF1).	7	0.00015636	0	1	1	1	1	Homologene group 1596	4	0	1	0	0	0	0	0	0	1	0	1	0	0	0	0	0	0	1
1460547_a_at	BB722680	Hnrpk	Heterogeneous nuclear ribonucleoprotein K	1	1	1	1	1	1	0	0	1	7	23	423.383	0.458333	0.00520353	HNRPK	Heterogeneous nuclear ribonucleoprotein K (hnRNP K) (Transformation up-regulated nuclear protein) (TUNP).	145	0.000997207	0	4	4
1424101_at	BC027206	Hnrpl	heterogeneous nuclear ribonucleoprotein L	1	1	1	1	1	1	0	0	1	7					HNRPL	Heterogeneous nuclear ribonucleoprotein L (hnRNP L).	130	0.000588512	0	1	1
1424617_at	BC008158	Ifi35	interferon-induced protein 35	1	1	1	1	1	1	0	0	1	7	77	215144	0.452128	0.00519901	IFI35	Interferon-induced 35 kDa protein (IFP 35).	2	0	0	1	1	1	1	Homologene group 4040	6	0	1	1	0	0	0	0	0	1	0	1	0	0	0	0	1	0	1
1449025_at	NM_010501	Ifit3	interferon-induced protein with tetratricopeptide repeats 3	1	1	1	1	1	1	0	0	1	7					IFIT3	Interferon-induced protein with tetratricopeptide repeats 3 (IFIT-3) (IFIT-4) (Interferon-induced 60 kDa protein) (IFI-60K) (ISG-60) (CIG49) (Retinoic acid-induced gene G protein) (RIG-G).	6	0.000589197	0	1	1
1422305_at	NM_010510	Ifnb1	interferon beta 1; fibroblast	1	0	1	1	1	1	0	1	1	7	2	0	NA	0.00518323	IFNB1	Interferon beta precursor (IFN-beta) (Fibroblast interferon).	2	0	0	1	1	1	0	Homologene group 1640	3	0	1	1	0	0	0	0	0	1	0	0	0	0	0	0	1	0	0
1426207_at	AF088910	Ikbkb	inhibitor of kappaB kinase beta	1	1	1	1	1	1	0	0	1	7	7	8490.94	0.1	0.00519311	IKBKB	Inhibitor of nuclear factor kappa-B kinase subunit beta (EC 2.7.11.10) (I-kappa-B-kinase beta) (IkBKB) (IKK-beta) (IKK-B) (I-kappa-B kinase 2) (IKK2) (Nuclear factor NF-kappa-B inhibitor kinase beta) (NFKBIKB).	77	0.000386623	1	0	1	1	1	Homologene group 7782	6	0	1	1	0	0	0	0	0	1	0	1	0	0	0	0	1	0	1
1454690_at	BB147462	Ikbkg	inhibitor of kappaB kinase gamma	1	1	1	1	1	1	0	0	1	7					IKBKG	NF-kappa-B essential modulator (NEMO) (NF-kappa-B essential modifier) (Inhibitor of nuclear factor kappa-B kinase subunit gamma) (IkB kinase subunit gamma) (I-kappa-B kinase gamma) (IKK-gamma) (IKKG) (IkB kinase-associated protein 1) (IKKAP1) (FIP-3).	162	0.00471885	0	2	2	1	1	Homologene group 2698	4	0	0	1	0	0	0	0	0	1	0	1	0	0	0	0	1	0	0
1450330_at	NM_010548	Il10	interleukin 10	1	1	1	1	1	1	0	0	1	7	13	12078.7	0.47619	0.00521464	IL10	Interleukin-10 precursor (IL-10) (Cytokine synthesis inhibitory factor) (CSIF).	3	0.00021909	0	1	1	1	1	Homologene group 478	6	0	1	1	0	0	0	0	0	1	0	1	0	0	0	0	1	0	1
1425454_a_at	AF128210	Il12a	interleukin 12a	1	1	1	1	1	1	0	0	1	7	71	37153.9	0.230918	0.00523058	IL12A	Interleukin 12 (Interleukin 12A) (Natural killer cell stimulatory factor 1, cytotoxic lymphocyte maturation factor 1, p35) (Interleukin 12, P35).	2	0	0	1	1	1	1	Homologene group 681	4	0	1	1	0	0	0	0	0	1	0	0	0	0	0	0	1	0	0
1421473_at	BC003727	Il1a	interleukin 1 alpha	1	1	1	1	1	1	0	0	1	7	109	103935	0.24254	0.0052329	IL1A	Interleukin-1 alpha precursor (IL-1 alpha) (Hematopoietin-1).	8	3.71e-05	0	1	1	1	1	Homologene group 480	4	0	1	1	0	0	0	0	0	1	0	0	0	0	0	0	1	0	0
1417244_a_at	NM_016850	Irf7	interferon regulatory factor 7	1	1	1	1	1	1	0	0	1	7					IRF7	Interferon regulatory factor 7 (IRF-7).	9	9.5e-06	0	2	2		0	Homologene group 1209	4	0	0	1	0	0	0	0	0	1	0	1	0	0	0	0	1	0	1
1452784_at	AK003416	Itgav	integrin alpha V	1	1	1	1	1	1	0	0	1	7	13	11006.4	0.214286	0.00522673	ITGAV	Integrin alpha-V precursor (Vitronectin receptor subunit alpha) (CD51 antigen) [Contains: Integrin alpha-V heavy chain; Integrin alpha-V light chain].	29	0.000761784	0	1	1	1	1	Homologene group 20510	8	0	1	1	1	0	0	1	0	1	0	1	0	0	0	0	1	0	1
1449379_at	NM_010612	Kdr	kinase insert domain protein receptor	1	1	1	1	1	1	0	0	1	7					KDR	Vascular endothelial growth factor receptor 2 precursor (EC 2.7.10.1) (VEGFR-2) (Kinase insert domain receptor) (Protein-tyrosine kinase receptor Flk-1) (CD309 antigen).	43	0.000449871	0	2	2	1	1	Homologene group 55639	5	0	1	0	0	0	0	0	0	1	0	1	0	0	0	0	1	0	1
1449478_at	NM_010810	Mmp7	matrix metalloproteinase 7	1	1	1	1	1	1	0	0	1	7	3	16748	0.333333	0.0051693	MMP7	Matrilysin precursor (EC 3.4.24.23) (Pump-1 protease) (Uterine metalloproteinase) (Matrix metalloproteinase-7) (MMP-7) (Matrin).	16	9.36e-05	0	1	1	1	1	Homologene group 37619	7	0	1	1	0	0	0	0	0	1	0	0	0	1	0	0	1	1	1
1421814_at	NM_010833	Msn	moesin	1	1	1	1	1	1	0	0	1	7					MSN	Moesin (Membrane-organizing extension spike protein).	29	0.000241908	0	1	1	1	1	Homologene group 1833	7	1	1	1	1	0	0	1	0	1	0	1	0	0	0	0	0	0	0
1425902_a_at	AF155372	Nfkb2	nuclear factor of kappa light polypeptide gene enhancer in B-cells 2; p49/p100	1	1	1	1	1	1	0	0	1	7	33	3152.66	0.359848	0.00523155	NFKB2	Nuclear factor NF-kappa-B p100 subunit (DNA-binding factor KBF2) (H2TF1) (Lymphocyte translocation chromosome 10) (Oncogene Lyt-10) (Lyt10) [Contains: Nuclear factor NF-kappa-B p52 subunit].	149	0.00125137	0	1	1	1	1	Homologene group 1873	4	0	1	1	0	0	0	0	0	1	0	1	0	0	0	0	0	0	0
1446718_at	BB174460	Nfkbib	nuclear factor of kappa light chain gene enhancer in B-cells inhibitor; beta	1	1	1	1	1	1	0	0	1	7	21	3509.39	0.37619	0.0052282	NFKBIB	NF-kappa-B inhibitor beta (NF-kappa-BIB) (I-kappa-B-beta) (IkappaBbeta) (IKB-beta) (IKB-B) (Thyroid receptor-interacting protein 9) (TRIP-9) (TR-interacting protein 9).	75	0.00114832	0	1	1	1	1	Homologene group 37631	4	0	1	1	0	0	0	0	0	1	0	0	0	0	0	0	1	0	0
1454941_at	BM207074	Nmt1	Expressed sequence AW536594	1	1	1	1	1	1	0	0	1	7					NMT1	Glycylpeptide N-tetradecanoyltransferase 1 (EC 2.3.1.97) (Peptide N- myristoyltransferase 1) (Myristoyl-CoA:protein N-myristoyltransferase 1) (NMT 1) (Type I N-myristoyltransferase).	17	0.000324304	0	1	1	1	1	Homologene group 69027	11	0	1	1	1	0	0	1	1	1	0	1	0	1	0	0	1	1	1
1424889_at	AB067574	Nupl2	nucleoporin like 2	1	1	1	1	1	1	0	0	1	7					NUPL2	Nucleoporin-like 2 (NLP-1) (hCG1) (NUP42 homolog).	34	0	0	1	1	1	1	Homologene group 40573	5	0	1	1	0	0	0	0	0	1	0	1	0	0	0	0	1	0	0
1422502_at	AF126717	Parp1	poly (ADP-ribose) polymerase family; member 1	1	1	1	1	1	1	0	0	1	7	4	0	1	0.00517337	PARP1	Poly [ADP-ribose] polymerase 1 (EC 2.4.2.30) (PARP-1) (ADPRT) (NAD(+) ADP-ribosyltransferase 1) (Poly[ADP-ribose] synthetase 1).	49	0.000819171	0	2	2	1	1	Homologene group 1222	10	1	1	1	1	0	0	1	0	1	0	1	0	1	0	0	0	1	1
1421535_a_at	NM_019798	Pde4a	phosphodiesterase 4A; cAMP specific	1	1	1	1	1	1	0	0	1	7	50	14890.3	0.272653	0.00523376	PDE4A	Phosphodiesterase 4A, cAMP-specific (Phosphodiesterase E2 dunce homolog, Drosophila).	0	0	0	1	1	1	1	Homologene group 4520	2	0	0	1	0	0	0	0	0	0	0	1	0	0	0	0	0	0	0
1434610_at	BM210485	Plec1	plectin 1	1	1	1	1	1	1	0	0	1	7	20	63775.5	0.384211	0.00523081	PLEC1	Plectin-1 (PLTN) (PCN) (Hemidesmosomal protein 1) (HD1) (Plectin-11).	17	8.19e-05	1	0	1	1	0	Homologene group 384	4	0	1	1	0	0	0	0	0	1	0	1	0	0	0	0	1	0	0
1448757_at	NM_008884	Pml	promyelocytic leukemia	1	1	1	1	1	1	0	0	1	7					PML	Probable transcription factor PML (Tripartite motif-containing protein 19) (RING finger protein 71).	52	0.000362161	0	2	2	1	0	Homologene group 13245	3	0	0	1	0	0	0	0	0	1	0	0	0	0	0	0	1	0	1
1427695_a_at	X56230	Pou2f1	POU domain; class 2; transcription factor 1	1	1	1	1	1	1	0	0	1	7					POU2F1	POU domain, class 2, transcription factor 1 (Octamer-binding transcription factor 1) (Oct-1) (OTF-1) (NF-A1).	51	0.000487758	0	2	2	1	1	Homologene group 37658	6	0	1	1	0	0	0	0	0	1	0	1	0	0	0	0	1	0	1
1448206_at	NM_008944	Psma2	proteasome (prosome; macropain) subunit; alpha type 2	1	1	1	1	1	1	0	0	1	7					PSMA2	Proteasome subunit alpha type 2 (EC 3.4.25.1) (Proteasome component C3) (Macropain subunit C3) (Multicatalytic endopeptidase complex subunit C3).	53	8.68e-06	0	1	1	1	1	Homologene group 2081	18	1	1	1	1	1	1	1	1	1	1	1	1	1	1	1	1	1	1
1422962_a_at	NM_010724	Psmb8	proteosome (prosome; macropain) subunit; beta type 8 (large multifunctional protease 7)	1	1	1	1	1	1	0	0	1	7	2	2717.36	0	0.00515358	PSMB8	Proteasome subunit beta type 8 precursor (EC 3.4.25.1) (Proteasome component C13) (Macropain subunit C13) (Multicatalytic endopeptidase complex subunit C13).	41	0	0	2	2	1	1	Homologene group 56499	5	0	1	1	0	0	0	0	0	1	0	1	0	0	0	0	1	0	0
1450696_at	NM_013585	Psmb9	proteosome (prosome; macropain) subunit; beta type 9 (large multifunctional protease 2)	1	1	1	1	1	1	0	0	1	7					PSMB9	Proteasome subunit beta type 9 precursor (EC 3.4.25.1) (Proteasome chain 7) (Macropain chain 7) (Multicatalytic endopeptidase complex chain 7) (RING12 protein) (Low molecular mass protein 2).	46	3.72e-05	0	1	1	1	1	Homologene group 2094	5	0	1	1	0	0	0	0	0	1	0	1	0	0	0	0	1	0	0
1422553_at	AA214868	Pten	phosphatase and tensin homolog	1	1	1	1	1	1	0	0	1	7					PTEN	Phosphatidylinositol-3,4,5-trisphosphate 3-phosphatase and dual- specificity protein phosphatase PTEN (EC 3.1.3.67) (EC 3.1.3.16) (EC 3.1.3.48) (Phosphatase and tensin homolog) (Mutated in multiple advanced cancers 1).	30	0.00115192	0	1	1	1	1	Homologene group 265	8	0	1	1	1	0	0	1	0	1	0	1	0	0	0	0	1	0	1
1429192_at	AV381512	Ski	Sloan-Kettering viral oncogene homolog	1	1	1	1	1	1	0	0	1	7	31	2701.99	0.382796	0.00523156	SKI	Ski oncogene (C-ski).	15	6.41e-05	1	0	1	1	1	Homologene group 31124	4	0	1	0	0	0	0	0	0	1	0	1	0	0	0	0	0	0	1
1460247_a_at	AV259620	Skp2	S-phase kinase-associated protein 2 (p45)	1	1	1	1	1	1	0	0	1	7					SKP2	S-phase kinase-associated protein 2 (F-box protein Skp2) (Cyclin A/CDK2-associated protein p45) (p45skp2) (F-box/LRR-repeat protein 1).	29	5.03e-05	0	1	1	1	1	Homologene group 55942	9	1	1	1	1	0	0	1	0	1	0	1	0	0	0	0	1	0	1
1452680_at	BQ043840	Snrpd2	Small nuclear ribonucleoprotein D2	1	1	1	1	1	1	0	0	1	7	11	3650.12	0.472727	0.0052162	SNRPD2	Small nuclear ribonucleoprotein Sm D2 (snRNP core protein D2) (Sm-D2).	128	0.000281074	0	2	2	1	1	Homologene group 3381	15	1	0	1	1	1	1	1	0	1	1	1	1	1	1	1	1	1	0
1418180_at	BG916549	Sp1	RIKEN cDNA 1110003E12 gene	1	1	1	1	1	1	0	0	1	7	2	1471.64	0	0.00515268	SP1	Transcription factor Sp1.	92	0.00178941	0	5	5	1	1	Homologene group 8276	5	0	1	1	0	0	0	0	0	1	0	1	0	0	0	0	1	0	0
1451821_a_at	U83636	Sp100	nuclear antigen Sp100	1	1	1	1	1	1	0	0	1	7					SP100	Nuclear autoantigen Sp-100 (Speckled 100 kDa) (Nuclear dot-associated Sp100 protein) (Lysp100b).	10	8.28e-06	0	1	1	1	0	Homologene group 86761	0	0	0	1	0	0	0	0	0	0	0	0	0	0	0	0	0	0	0
1450033_a_at	AW214029	Stat1	signal transducer and activator of transcription 1	1	1	1	1	1	1	0	0	1	7					STAT1	Signal transducer and activator of transcription 1-alpha/beta (Transcription factor ISGF-3 components p91/p84).	85	0.00219833	1	3	4	1	1	Homologene group 21428	5	0	1	1	0	0	0	0	0	1	0	1	0	0	0	0	0	0	1
1426587_a_at	AI325183	Stat3	signal transducer and activator of transcription 3	1	1	1	1	1	1	0	0	1	7	7	15441.9	0.142857	0.00521007	STAT3	Colon cancer-associated antigen AgSK1-2HT-ECS.	0	0	0	1	1	1	1	Homologene group 7960	6	0	1	1	0	0	0	0	0	1	0	1	0	0	0	0	1	0	1
1421811_at	AI385532	Thbs1	thrombospondin 1	1	1	1	1	1	1	0	0	1	7	30	270.093	0.779412	0.00517373	THBS1	Thrombospondin-1 precursor.	36	0.000346102	0	1	1	1	1	Homologene group 31142	5	0	1	0	0	0	0	0	0	1	0	1	0	0	0	0	1	0	1
1450377_at	AI385532	Thbs1	thrombospondin 1	1	1	1	1	1	1	0	0	1	7	2	0	NA	0.000228467	THBS1	Thrombospondin-1 precursor.	36	0.000346102	0	1	1	1	1	Homologene group 31142	5	0	1	0	0	0	0	0	0	1	0	1	0	0	0	0	1	0	1
1422010_at	AY035889	Tlr7	toll-like receptor 7	1	1	1	1	1	1	0	0	1	7					TLR7	Toll-like receptor 7 precursor.	15	0	3	0	3	1	1	Homologene group 75060	6	0	1	1	0	0	0	0	0	1	0	1	0	0	0	0	1	0	1
1448515_at	BB818311	Tsn	translin	1	1	1	1	1	1	0	0	1	7	6	1994.28	0.0666667	0.00521629	TSN	Translin.	10	5.92e-05	0	1	1	1	1	Homologene group 3397	13	0	1	1	1	0	1	1	0	1	1	1	0	1	1	0	1	1	1
1420829_a_at	NM_011739	Ywhaq	tyrosine 3-monooxygenase/tryptophan 5-monooxygenase activation protein; theta polypeptide	1	1	1	1	1	1	0	0	1	7	12	1795.77	0.530303	0.00521639	YWHAQ	14-3-3 protein theta (14-3-3 protein tau) (14-3-3 protein T-cell) (HS1 protein).	105	0.0017564	1	0	1	1	0	Homologene group 48407	2	0	1	1	0	0	0	0	0	0	0	0	0	0	0	0	0	0	1
1426005_at	U65020	Dmp1	dentin matrix protein 1	1	1	1	1	1	1	0	0	1	7	22	536042	0.0384615	0.00524021								1	1	Homologene group 68396	4	0	0	1	0	0	0	0	0	1	0	0	0	0	0	0	1	0	1
1416503_at	NM_016753	Lxn	latexin	1	1	1	1	1	1	0	0	1	7	31	286227	0.235294	0.00521373								1	1	Homologene group 36361	5	0	1	1	0	0	0	0	0	1	0	1	0	0	0	0	0	0	1
1449926_at	NM_011617	Tnfsf7	tumor necrosis factor (ligand) superfamily; member 7	1	1	1	1	1	1	0	0	1	7	41	248030	0.17029	0.0052324
1422445_at	BM935811	Itga6	integrin alpha 6	1	1	1	1	1	1	0	0	1	7	57	217265	0.242424	0.00522488								1	1	Homologene group 20091	6	0	1	1	0	0	0	0	0	1	0	1	0	0	0	0	1	0	1
1443503_at	BB515192	D830007E07Rik	RIKEN cDNA D830007E07 gene	1	1	1	1	1	1	0	0	1	7	61	211259	0.515873	0.00520284
1453627_at	BB153741	2610020P09Rik	RIKEN cDNA 2610020P09 gene	1	1	1	1	1	1	0	0	1	7	38	208126	0.217391	0.00524466
1453198_at	BM227942	MGI:3028594	zinc finger protein 422; related sequence 1	1	1	1	1	1	1	0	0	1	7	20	206203	0.153846	0.00523733
1430669_at	AV088400	Krtap4-7	keratin associated protein 4-7	1	1	1	1	1	1	0	0	1	7	15	197135	0	0.00522323									0	Homologene group 87888	3	0	1	1	0	0	0	0	0	1	0	0	0	0	0	0	1	0	0
1431023_at	BG297856	C030046E11Rik	RIKEN cDNA C030046E11 gene	1	1	1	1	1	1	0	0	1	7	110	186408	0.20911	0.00524746								1	1	Homologene group 13806	8	1	1	1	1	0	0	1	0	1	0	1	0	0	0	0	1	0	0
1436711_at	BB247665	Actr5	ARP5 actin-related protein 5 homolog (yeast)	1	1	1	1	1	1	0	0	1	7	27	163245	0.141667	0.00524199								1	0	Homologene group 6818	14	0	1	1	1	1	1	1	0	1	1	1	1	1	1	1	1	0	1
1430934_at	AK012899	2810043G22Rik	RIKEN cDNA 2810043G22 gene	1	1	1	1	1	1	0	0	1	7	10	160539	0.133333	0.00523271
1449189_at	NM_030252	BC003266	cDNA sequence BC003266	1	1	1	1	1	1	0	0	1	7	46	159627	0.231527	0.00524714								1	1	Homologene group 87074	3	0	0	1	0	0	0	0	0	0	0	1	0	0	0	0	1	0	0
1418304_at	NM_130878	Pcdh21	protocadherin 21	1	1	1	1	1	1	0	0	1	7	13	152222	0.128205	0.005239								1	1	Homologene group 13215	6	0	1	1	0	0	0	0	0	1	0	1	0	0	0	0	1	0	1
1460422_at	U80892	D0Kist5	DNA segment; KIST 5	1	1	1	1	1	1	0	0	1	7	50	144050	0.236453	0.00524988
1433527_at	BB080732	Ireb2	iron responsive element binding protein 2	1	1	1	1	1	1	0	0	1	7	57	142384	0.305376	0.00523638								1	0	Homologene group 11280	5	0	1	1	0	0	0	0	0	1	0	1	0	0	0	0	1	0	1
1417573_at	NM_133839	2010311D03Rik	RIKEN cDNA 2010311D03 gene	1	1	1	1	1	1	0	0	1	7	42	135940	0.172308	0.00524458								1	1	Homologene group 9248	7	1	1	1	0	0	0	0	0	1	0	1	0	0	0	0	1	0	1
1415795_at	BM228780	Spin	spindlin	1	1	1	1	1	1	0	0	1	7	59	127488	0.205128	0.00523105
1416829_at	NM_016774	Atp5b	ATP synthase; H+ transporting mitochondrial F1 complex; beta subunit	1	1	1	1	1	1	0	0	1	7	24	127174	0.525641	0.00523612								1	1	Homologene group 1273	18	1	1	1	1	1	1	1	1	1	1	1	1	1	1	1	1	1	1
1419209_at	NM_008176	Cxcl1	chemokine (C-X-C motif) ligand 1	1	1	1	1	1	1	0	0	1	7	14	123773	0.178571	0.00521272								1	1	Homologene group 105490	3	0	0	1	0	0	0	0	0	1	0	0	0	0	0	0	1	0	0
1453407_at	AK006092	1700018L24Rik	RIKEN cDNA 1700018L24 gene	1	1	1	1	1	1	0	0	1	7	44	120607	0.17094	0.00522063								1	1	Homologene group 51840	4	0	1	1	0	0	0	0	0	1	0	0	0	0	0	0	1	0	0
1457466_at	BB054673	9630050M13Rik	RIKEN cDNA 9630050M13 gene	1	1	1	1	1	1	0	0	1	7	51	114052	0.179803	0.00524608
1437449_at	BB818348	BC056485	cDNA sequence BC056485	1	1	1	1	1	1	0	0	1	7	11	111341	0.436364	0.00519738
1448872_at	NM_011260	Reg3g	regenerating islet-derived 3 gamma	1	1	1	1	1	1	0	0	1	7	13	108305	0.141026	0.00522483									1	Homologene group 105653	3	0	0	1	0	0	0	0	0	1	0	0	0	0	0	0	1	0	0
1437755_at	BB503566	Slc5a12	solute carrier family 5 (sodium/glucose cotransporter); member 12	1	1	1	1	1	1	0	0	1	7	81	102176	0.181173	0.00522022								1	1	Homologene group 15107	7	1	1	1	0	0	0	0	0	1	0	1	0	0	0	0	1	0	1
1431043_at	W78395	Kbtbd5	kelch repeat and BTB (POZ) domain containing 5	1	1	1	1	1	1	0	0	1	7	55	96758.9	0.11553	0.00524346								1	1	Homologene group 17571	3	0	0	0	0	0	0	0	0	1	0	1	0	0	0	0	0	0	1
1416894_at	NM_024172	1500019G21Rik	RIKEN cDNA 1500019G21 gene	1	1	1	1	1	1	0	0	1	7	40	95280.3	0.126667	0.0052413								1
1435693_at	AV378589	BC012256	cDNA sequence BC012256	1	1	1	1	1	1	0	0	1	7	109	94247.1	0.295823	0.00523629
1424150_at	BC024955	BC024955	cDNA sequence BC024955	1	1	1	1	1	1	0	0	1	7	122	93143.6	0.284627	0.00524613
1428834_at	AK012530	Dusp4	dual specificity phosphatase 4	1	1	1	1	1	1	0	0	1	7	96	92057.7	0.27044	0.00524096								1	0	Homologene group 1065	7	0	1	1	0	0	0	0	0	1	0	1	0	1	0	0	1	1	1
1438408_at	BB131927	5730467H21Rik	RIKEN cDNA 5730467H21 gene	1	1	1	1	1	1	0	0	1	7	89	90670.9	0.313283	0.00523894
1429065_at	AK006283	1700023M03Rik	RIKEN cDNA 1700023M03 gene	1	1	1	1	1	1	0	0	1	7	110	87717.2	0.202899	0.00523092
1420581_at	U63918	Gpr143	G protein-coupled receptor 143	1	1	1	1	1	1	0	0	1	7	26	86874.6	0.125	0.00524252								1	1	Homologene group 230	6	0	1	1	0	0	0	1	0	1	0	1	0	0	0	0	0	0	1
1431049_at	BM964047	1700030B17Rik	RIKEN cDNA 1700030B17 gene	1	1	1	1	1	1	0	0	1	7	103	85944.7	0.182284	0.0052319
1440105_at	AV274019	4932416A15	hypothetical protein 4932416A15	1	1	1	1	1	1	0	0	1	7	144	82465.4	0.236416	0.00524018
1421930_at	AB023132	Icos	inducible T-cell co-stimulator	1	1	1	1	1	1	0	0	1	7	69	81356.3	0.246955	0.00523702								1	1	Homologene group 8097	4	0	1	0	0	0	0	0	0	1	0	0	0	0	0	0	1	0	1
1430585_at	BG798082	5930436O19Rik	RIKEN cDNA 5930436O19 gene	1	1	1	1	1	1	0	0	1	7	34	76969.6	0.192982	0.00524375
1443387_at	BB045044	BC067047	CDNA sequence BC067047	1	1	1	1	1	1	0	0	1	7	26	73379.6	0.2	0.00522635									1	Homologene group 10821	5	0	1	1	0	0	0	0	0	1	0	1	0	0	0	0	0	0	1
1460300_a_at	NM_008523	Ltk	leukocyte tyrosine kinase	1	1	1	1	1	1	0	0	1	7	33	72449.3	0.428571	0.00523591								1	0	Homologene group 37613	7	1	0	1	1	0	0	1	0	1	0	1	0	0	0	0	1	0	1
1418018_at	NM_007754	Cpd	carboxypeptidase D	1	1	1	1	1	1	0	0	1	7	49	72408.9	0.193103	0.00523526								1	0	Homologene group 999	9	1	1	1	1	0	0	1	0	1	0	1	0	1	0	0	0	1	1
1418799_a_at	NM_007732	Col17a1	procollagen; type XVII; alpha 1	1	1	1	1	1	1	0	0	1	7	50	69710.3	0.212903	0.00523518								1	1	Homologene group 7276	5	0	1	1	0	0	0	0	0	1	0	1	0	0	0	0	0	0	1
1421096_at	BB817939	Trpc1	transient receptor potential cation channel; subfamily C; member 1	1	1	1	1	1	1	0	0	1	7	24	66259.4	0.144928	0.00524763								1	1	Homologene group 2478	5	0	1	1	0	0	0	0	0	1	0	1	0	0	0	0	0	0	1
1449031_at	U65091	Cited1	Cbp/p300-interacting transactivator with Glu/Asp-rich carboxy-terminal domain 1	1	1	1	1	1	1	0	0	1	7	35	63517.3	0.210526	0.00523739								1	0	Homologene group 3057	4	0	1	1	0	0	0	0	0	1	0	1	0	0	0	0	1	0	0
1429268_at	AK012048	---	---	1	1	1	1	1	1	0	0	1	7	54	61588.6	0.185484	0.00524492
1459901_at	BG077646	6820429M01	hypothetical protein 6820429M01	1	1	1	1	1	1	0	0	1	7	23	61582.7	0.27668	0.00524667
1446261_at	BG068111	---	---	1	1	1	1	1	1	0	0	1	7	37	61370.8	0.406926	0.00522875
1435546_a_at	BM227762	1810013L24Rik	RIKEN cDNA 1810013L24 gene	1	1	1	1	1	1	0	0	1	7	18	60532	0.166667	0.00521798								1	1	Homologene group 105712	3	0	0	1	0	0	0	0	0	1	0	1	0	0	0	0	0	0	0
1460196_at	NM_007620	Cbr1	carbonyl reductase 1	1	1	1	1	1	1	0	0	1	7	19	59819.8	0.327273	0.00523205								1	0	Homologene group 37524	7	0	1	1	0	0	0	0	0	1	0	1	0	1	0	0	1	1	1
1417786_a_at	BC003838	Rgs19	regulator of G-protein signaling 19	1	1	1	1	1	1	0	0	1	7	12	58684	0.151515	0.00522352								1	1	Homologene group 23320	5	0	1	1	0	0	0	0	0	1	0	1	0	0	0	0	1	0	0
1422851_at	X58380	Hmga2	high mobility group AT-hook 2	1	1	1	1	1	1	0	0	1	7	39	57564.9	0.300725	0.00523089								1	0	Homologene group 2602	4	0	0	1	0	0	0	0	0	1	0	1	0	0	0	0	1	0	1
1448156_at	NM_009362	Tff1	trefoil factor 1	1	1	1	1	1	1	0	0	1	7	22	57007.7	0.106061	0.00523734								1
1418430_at	BI328541	Kif5b	kinesin family member 5B	1	1	1	1	1	1	0	0	1	7	13	54869.2	0.0277778	0.00519601								1	1	Homologene group 55829	9	1	1	1	1	0	0	1	0	1	0	1	0	0	0	0	1	0	1
1420368_at	AK010394	Denr	density-regulated protein	1	1	1	1	1	1	0	0	1	7	25	54446.2	0.263736	0.00523185								1	1	Homologene group 6275	16	1	1	1	1	1	1	1	0	1	1	1	1	1	1	1	0	1	1
1444084_at	BB175323	Prrg4	proline rich Gla (G-carboxyglutamic acid) 4 (transmembrane)	1	1	1	1	1	1	0	0	1	7	30	53927	0.225	0.00523124								1	1	Homologene group 11451	5	0	1	1	0	0	0	0	0	1	0	0	0	0	0	0	1	0	1
1427736_a_at	AJ318863	Ccrl2	chemokine (C-C motif) receptor-like 2	1	1	1	1	1	1	0	0	1	7	107	53692.8	0.252827	0.00524311								1	1	Homologene group 2948	4	0	1	1	0	0	0	0	0	1	0	0	0	0	0	0	1	0	0
1418067_at	AI323758	Cfl2	cofilin 2; muscle	1	1	1	1	1	1	0	0	1	7	54	52689.2	0.26738	0.00523478								1	1	Homologene group 39624	14	0	1	1	0	1	1	0	0	1	1	1	1	1	1	1	1	1	1
1441160_at	BB480783	D330050G23Rik	RIKEN cDNA D330050G23 gene	1	1	1	1	1	1	0	0	1	7	22	52652.3	0.131868	0.00522276
1460011_at	AW049789	Cyp26b1	cytochrome P450; family 26; subfamily b; polypeptide 1	1	1	1	1	1	1	0	0	1	7	16	52430.1	0.0444444	0.00522035								1	1	Homologene group 23179	7	0	1	1	0	0	0	0	0	1	0	1	0	1	0	0	1	0	1
1433951_at	BG064956	Arl5	ADP-ribosylation factor-like 5	1	1	1	1	1	1	0	0	1	7	120	47648.8	0.267909	0.00524024
1452035_at	BF158638	Col4a1	procollagen; type IV; alpha 1	1	1	1	1	1	1	0	0	1	7	25	47323.2	0.161905	0.00522115								1	1	Homologene group 20437	5	0	1	1	0	0	0	0	0	1	0	1	0	0	0	0	0	0	1
1450513_at	NM_021293	Cd33	CD33 antigen	1	1	1	1	1	1	0	0	1	7	16	47162.7	0.285714	0.00522663								1
1420074_at	AU019170	---	---	1	1	1	1	1	1	0	0	1	7	56	46320.9	0.228164	0.0052392
1448863_a_at	AK004593	Tnfaip1	tumor necrosis factor; alpha-induced protein 1 (endothelial)	1	1	1	1	1	1	0	0	1	7	55	46191.9	0.23569	0.00524081								1	1	Homologene group 22519	6	0	1	1	0	0	0	0	0	1	0	1	0	0	0	0	1	0	1
1451320_at	BC010306	3110043J09Rik	RIKEN cDNA 3110043J09 gene	1	1	1	1	1	1	0	0	1	7	70	46156.4	0.235772	0.00523105
1421494_at	NM_026807	1110033F04Rik	RIKEN cDNA 1110033F04 gene	1	1	1	1	1	1	0	0	1	7	42	46149.8	0.201581	0.00523906									1	Homologene group 87884	2	0	0	0	0	0	0	0	0	1	0	0	0	0	0	0	1	0	0
1434322_at	BB513585	A930021H16Rik	RIKEN cDNA A930021H16 gene	1	1	1	1	1	1	0	0	1	7	29	45408.3	0.261438	0.00523263
1417271_a_at	NM_007932	Eng	endoglin	1	1	1	1	1	1	0	0	1	7	20	45396.9	0.127273	0.00522236								1	1	Homologene group 92	4	0	1	0	0	0	0	0	0	1	0	0	0	0	0	0	1	0	1
1437668_at	BB543291	---	---	1	1	1	1	1	1	0	0	1	7	75	44938.8	0.277778	0.00524052
1442403_at	BB295093	B130034C11Rik	RIKEN cDNA B130034C11 gene	1	1	1	1	1	1	0	0	1	7	30	44490.6	0.166667	0.00523194
1449777_at	AV132298	---	---	1	1	1	1	1	1	0	0	1	7	58	44205.7	0.269162	0.00523855
1446110_at	BG069230	---	---	1	1	1	1	1	1	0	0	1	7	13	43700.8	0.107143	0.00522948
1423655_a_at	BC014687	1500010J02Rik	RIKEN cDNA 1500010J02 gene	1	1	1	1	1	1	0	0	1	7	44	43426.9	0.11828	0.00523878								1	1	Homologene group 11830	6	0	1	1	0	0	0	0	0	1	0	1	0	0	0	0	1	0	1
1449082_at	NM_015776	Mfap5	microfibrillar associated protein 5	1	1	1	1	1	1	0	0	1	7	22	43418.4	0.192308	0.00520976								1	1	Homologene group 2599	5	0	1	1	0	0	0	0	0	1	0	0	0	0	0	0	1	0	1
1440586_at	BB326079	B430203I24Rik	RIKEN cDNA B430203I24 gene	1	1	1	1	1	1	0	0	1	7	46	43383.7	0.193333	0.00523651
1418748_at	NM_009809	Casp14	caspase 14	1	1	1	1	1	1	0	0	1	7	54	43268.5	0.340463	0.00523152								1	1	Homologene group 36304	3	0	1	1	0	0	0	0	0	1	0	0	0	0	0	0	0	0	0
1455619_at	AA185687	BC062258	cDNA sequence BC062258	1	1	1	1	1	1	0	0	1	7	29	42491.3	0.316176	0.00524128
1421724_at	NM_030737	V1rd7	vomeronasal 1 receptor; D7	1	1	1	1	1	1	0	0	1	7	46	42483.6	0.142857	0.00524134
1440327_at	AA985897	Cyp2c70	Cytochrome P450; family 2; subfamily c; polypeptide 70	1	1	1	1	1	1	0	0	1	7	26	40406.2	0.263736	0.00522922									0	Homologene group 120027	0	0	0	1	0	0	0	0	0	0	0	0	0	0	0	0	0	0	0
1451124_at	BC002066	Sod1	superoxide dismutase 1; soluble	1	1	1	1	1	1	0	0	1	7	14	40296.4	0.351648	0.00521858								1
1434679_at	BM945195	Cspg3	chondroitin sulfate proteoglycan 3	1	1	1	1	1	1	0	0	1	7	37	39671	0.27668	0.00523455
1444109_at	BB526251	C130009A20Rik	RIKEN cDNA C130009A20 gene	1	1	1	1	1	1	0	0	1	7	33	39381.7	0.180952	0.00523264
1433116_at	AK017837	5730552O08Rik	RIKEN cDNA 5730552O08 gene	1	1	1	1	1	1	0	0	1	7	101	38661.5	0.271635	0.0052362
1444124_a_at	BB555188	E330017L17Rik	RIKEN cDNA E330017L17 gene	1	1	1	1	1	1	0	0	1	7	46	38525.8	0.363077	0.00522975
1448725_at	NM_011960	Parg	poly (ADP-ribose) glycohydrolase	1	1	1	1	1	1	0	0	1	7	20	36775.3	0.178947	0.00521629								1	1	Homologene group 50532	7	0	1	1	1	0	0	0	0	1	0	1	0	0	0	0	1	0	1
1420900_a_at	AW542340	Rab18	RAB18; member RAS oncogene family	1	1	1	1	1	1	0	0	1	7	6	36392.5	0	0.00521292								1	1	Homologene group 40765	11	1	1	1	1	0	0	1	1	1	0	1	0	1	0	0	1	0	1
1421645_at	NM_030728	9930013L23Rik	RIKEN cDNA 9930013L23 gene	1	1	1	1	1	1	0	0	1	7	43	35503.5	0.264493	0.00522466								1	1	Homologene group 10268	6	0	1	1	0	0	0	0	0	1	0	1	0	0	0	0	1	0	1
1423415_at	BB110067	Gpr83	G protein-coupled receptor 83	1	1	1	1	1	1	0	0	1	7	28	35114.1	0.202614	0.00521943								1	1	Homologene group 7732	7	0	1	1	1	0	0	1	0	1	0	0	0	0	0	0	1	0	1
1415821_at	NM_009145	Sdfr1	stromal cell derived factor receptor 1	1	1	1	1	1	1	0	0	1	7	14	34705.6	0.142857	0.00522788
1435176_a_at	BF019883	Idb2	inhibitor of DNA binding 2	1	1	1	1	1	1	0	0	1	7	10	34603.9	0.142857	0.00522168
1420965_a_at	BM120053	Enc1	ectodermal-neural cortex 1	1	1	1	1	1	1	0	0	1	7	11	34509.8	0.142857	0.00522505								1	1	Homologene group 2694	6	0	1	1	0	0	0	0	0	1	0	1	0	0	0	0	1	0	1
1439059_at	BB709811	BC031748	CDNA sequence BC031748	1	1	1	1	1	1	0	0	1	7	94	34450.1	0.264368	0.00523521								1	1	Homologene group 17156	4	0	1	0	0	0	0	0	0	1	0	1	0	0	0	0	1	0	0
1423233_at	BB831146	Cebpd	CCAAT/enhancer binding protein (C/EBP); delta	1	1	1	1	1	1	0	0	1	7	14	34120.1	0.0555556	0.00521944								1	1	Homologene group 3808	4	0	1	0	0	0	0	0	0	1	0	1	0	0	0	0	1	0	0
1449177_at	NM_007628	Ccna1	cyclin A1	1	1	1	1	1	1	0	0	1	7	70	33780.1	0.495122	0.00516733								1	1	Homologene group 31203	7	0	1	1	0	0	0	0	0	1	0	1	0	1	0	0	1	0	1
1430277_at	AK020456	9430034F23Rik	RIKEN cDNA 9430034F23 gene	1	1	1	1	1	1	0	0	1	7	10	33360.9	0.266667	0.00518243
1448809_at	NM_023565	Cse1l	chromosome segregation 1-like (S. cerevisiae)	1	1	1	1	1	1	0	0	1	7	47	33200.1	0.261905	0.00523063								1	1	Homologene group 1006	16	0	1	1	1	1	1	1	0	1	1	1	1	1	1	1	1	1	1
1418301_at	NM_016851	Irf6	interferon regulatory factor 6	1	1	1	1	1	1	0	0	1	7	62	33198.5	0.402564	0.00517912								1	1	Homologene group 4479	6	0	1	1	0	0	0	0	0	1	0	1	0	0	0	0	1	0	1
1455180_at	BG063148	AA407270	Expressed sequence AA407270	1	1	1	1	1	1	0	0	1	7	23	32994.9	0.217949	0.00522387
1431865_a_at	AK015213	4933405K07Rik	RIKEN cDNA 4933405K07 gene	1	1	1	1	1	1	0	0	1	7	16	32978.7	0.216667	0.00524117
1428483_a_at	AK012762	2610039C10Rik	RIKEN cDNA 2610039C10 gene	1	1	1	1	1	1	0	0	1	7	40	32966.9	0.235507	0.00524104								1	1	Homologene group 41294	6	0	1	1	0	0	0	0	0	1	0	1	0	0	0	0	1	0	1
1439506_at	BB193557	Gm98	gene model 98; (NCBI)	1	1	1	1	1	1	0	0	1	7	52	32918.6	0.128788	0.00521155								1	1	Homologene group 32167	4	0	1	1	0	0	0	0	0	1	0	0	0	0	0	0	0	0	1
1436995_a_at	AV124660	Rpl26	ribosomal protein L26	1	1	1	1	1	1	0	0	1	7	5	32409.3	0.1	0.00520086								1	1	Homologene group 113207	17	1	1	1	1	1	1	1	1	1	1	1	1	1	1	1	1	1	0
1459926_at	BG079055	---	---	1	1	1	1	1	1	0	0	1	7	22	32195	0.153846	0.00522179
1437251_at	BG065056	Cdca2	cell division cycle associated 2	1	1	1	1	1	1	0	0	1	7	65	31877.3	0.487179	0.00516729								1	1	Homologene group 18444	6	0	1	1	0	0	0	0	0	1	0	1	0	0	0	0	1	0	1
1438437_a_at	AV205521	4933439C10Rik	RIKEN cDNA 4933439C10 gene	1	1	1	1	1	1	0	0	1	7	18	31549.6	0.2	0.00523475
1442621_at	C77798	2700023B17Rik	RIKEN cDNA 2700023B17 gene	1	1	1	1	1	1	0	0	1	7	32	30953.5	0.326316	0.00522447
1420382_at	NM_138310	MGI:2176230	apolipoprotein B48 receptor	1	1	1	1	1	1	0	0	1	7	14	30826.3	0.138889	0.00522587
1435296_at	AV349563	Adra2c	adrenergic receptor; alpha 2c	1	1	1	1	1	1	0	0	1	7	41	30810.6	0.144928	0.00521232								1	0	Homologene group 20170	4	0	1	1	0	0	0	0	0	1	0	1	0	0	0	0	0	0	1
1458467_at	AA763224	1110032D16Rik	RIKEN cDNA 1110032D16 gene	1	1	1	1	1	1	0	0	1	7	8	29716.4	0	0.00520233
1433702_at	BI663634	D19Wsu12e	DNA segment; Chr 19; Wayne State University 12; expressed	1	1	1	1	1	1	0	0	1	7	15	29355.5	0.133333	0.0052303
1448467_a_at	NM_053252	LOC114601	tangerin	1	1	1	1	1	1	0	0	1	7	54	29263.9	0.228571	0.00521704
1425626_at	J03952	Gstm1	glutathione S-transferase; mu 1	1	1	1	1	1	1	0	0	1	7	11	29000.3	0.190476	0.00519495								1	0	Homologene group 115474	2	0	0	1	0	0	0	0	0	1	0	0	0	0	0	0	1	0	0
1428083_at	AK018202	2310043N10Rik	RIKEN cDNA 2310043N10 gene	1	1	0	1	1	1	0	1	1	7	14	28576.9	0.0444444	0.00521047
1418854_at	NM_007465	Birc2	baculoviral IAP repeat-containing 2	1	1	1	1	1	1	0	0	1	7	60	27618.9	0.24359	0.00522549								1	0	Homologene group 900	5	0	1	1	0	0	0	0	0	1	0	1	0	0	0	0	1	0	1
1421590_at	NM_030726	Mrgprh	MAS-related GPR; member H	1	1	1	1	1	1	0	0	1	7	24	27605.8	0.119565	0.00524376									0	Homologene group 12758	0	0	0	1	0	0	0	0	0	0	0	0	0	0	0	0	0	0	0
1449005_at	NM_030696	Slc16a3	solute carrier family 16 (monocarboxylic acid transporters); member 3	1	1	1	1	1	1	0	0	1	7	17	27588.2	0.213235	0.00523963								1	1	Homologene group 37900	7	0	1	1	0	0	0	0	0	1	0	1	0	0	1	0	1	0	1
1416747_at	NM_134100	D15Mgi27	DNA Segment; Chr 15; Mouse Genome Informatics 27	1	1	1	1	1	1	0	0	1	7	13	26532.3	0.142857	0.00519945
1457100_at	AW552889	---	Similar to senescence downregulated leo1-like	1	1	1	1	1	1	0	0	1	7	71	26471.8	0.318235	0.00523022
1441195_at	BB044338	6030487A22Rik	RIKEN cDNA 6030487A22 gene	1	1	1	1	1	1	0	0	1	7	18	26388.3	0.311111	0.00522622
1453764_at	BG087883	2610002D03Rik /// 3110021N24Rik	RIKEN cDNA 2610002D03 gene /// RIKEN cDNA 3110021N24 gene	1	1	1	1	1	1	0	0	1	7	42	26054	0.23545	0.00523677
1417454_at	AW536452	Cul4b	cullin 4B	1	1	1	1	1	1	0	0	1	7	58	25094.8	0.355556	0.00522975								1	1	Homologene group 2660	10	0	1	1	1	0	0	1	0	1	1	1	0	1	1	0	0	0	1
1455597_at	AV024458	AI585793	expressed sequence AI585793	1	1	1	1	1	1	0	0	1	7	83	24965.5	0.332367	0.00523576
1460397_at	BB402275	Armc6	armadillo repeat containing 6	1	1	1	1	1	1	0	0	1	7	15	23963.7	0.155556	0.00522274								1	1	Homologene group 14121	9	0	1	1	1	0	0	1	0	1	0	1	0	1	0	0	0	1	1
1437408_at	BB812574	Gpr126	G protein-coupled receptor 126	1	1	1	1	1	1	0	0	1	7	57	23208.6	0.198319	0.0052296								1	1	Homologene group 10724	6	0	1	1	0	0	0	0	0	1	0	1	0	0	0	0	1	0	1
1424706_at	BC011183	Zfp51	zinc finger protein 51	1	1	1	1	1	1	0	0	1	7	34	23163.4	0.219048	0.00523344									0	Homologene group 88797	1	0	0	1	0	0	0	0	0	1	0	0	0	0	0	0	0	0	0
1429344_at	BB357317	9130000000000000	hypothetical 9130022E09	1	1	1	1	1	1	0	0	1	7	13	23162	0.238095	0.00522677
1450217_at	BG867337	Ccl28	chemokine (C-C motif) ligand 28	1	1	1	1	1	1	0	0	1	7	68	23148.5	0.283298	0.00523369								1	1	Homologene group 10649	4	0	1	1	0	0	0	0	0	1	0	0	0	0	0	0	1	0	0
1460699_at	AA208652	---	---	1	1	1	1	1	1	0	0	1	7	37	23077.2	0.332308	0.00522364
1448282_at	BC006750	Plrg1	pleiotropic regulator 1; PRL1 homolog (Arabidopsis)	1	1	1	1	1	1	0	0	1	7	11	22473.8	0.236364	0.00523093								1	1	Homologene group 2004	17	1	1	1	1	1	1	1	0	1	1	1	1	1	1	1	1	1	1
1420518_a_at	AF317839	Igsf9	immunoglobulin superfamily; member 9	1	1	1	1	1	1	0	0	1	7	92	22464.8	0.395644	0.00518656								1	1	Homologene group 10815	5	0	1	1	0	0	0	0	0	1	0	1	0	0	0	0	0	0	1
1442315_at	AI426778	Foxd2	Forkhead box D2	1	1	1	1	1	1	0	0	1	7	11	22247.4	0	0.00522456								1	0	Homologene group 3292	1	0	0	1	0	0	0	0	0	1	0	0	0	0	0	0	0	0	0
1453634_a_at	AK013303	Erp29	endoplasmic reticulum protein 29	1	1	1	1	1	1	0	0	1	7	109	22213.9	0.313364	0.00523656								1	1	Homologene group 4963	7	0	1	1	1	0	0	1	0	1	0	0	0	0	0	0	1	0	1
1440339_at	AW910504	4833416E15Rik	RIKEN cDNA 4833416E15 gene	1	1	1	1	1	1	0	0	1	7	31	22088.5	0.24183	0.00522876
1440446_at	BM021767	Nkd1	Naked cuticle 1 homolog (Drosophila)	1	1	1	1	1	1	0	0	1	7	29	21969.6	0.345588	0.00524044								1	1	Homologene group 12343	6	0	1	1	0	0	0	0	0	1	0	1	0	0	0	0	1	0	1
1436576_at	BB239429	A630077B13Rik	RIKEN cDNA A630077B13 gene	1	1	1	1	1	1	0	0	1	7	83	21639.7	0.314716	0.00523232
1429480_at	AK005882	1700011N24Rik	RIKEN cDNA 1700011N24 gene	1	1	1	1	1	1	0	0	1	7	20	21468.4	0.192308	0.0052332
1416529_at	U25633	Emp1	epithelial membrane protein 1	1	1	1	1	1	1	0	1	0	7	24	20980.1	0.2	0.00522422								1	1	Homologene group 1088	5	0	1	1	0	0	0	0	0	1	0	0	0	0	0	0	1	0	1
1429902_at	BB165850	5830443J22Rik	RIKEN cDNA 5830443J22 gene	1	1	1	1	1	1	0	0	1	7	3	20930	0	0.00517035
1436520_at	BB378317	AI450948	expressed sequence AI450948	1	1	1	1	1	1	0	0	1	7	10	20189.4	0.3	0.00521855
1433776_at	AV149705	2810489O06Rik	RIKEN cDNA 2810489O06 gene	1	1	1	1	1	1	0	0	1	7	7	20132.2	0.1	0.00520926
1451053_a_at	AV313203	Mdm1	transformed mouse 3T3 cell double minute 1	1	1	1	1	1	1	0	0	1	7	26	20124.4	0.175	0.00522942								1	0	Homologene group 9692	5	0	1	1	0	0	0	0	0	1	0	1	0	0	0	0	1	0	1
1449485_at	AA186144	Ripk1	receptor (TNFRSF)-interacting serine-threonine kinase 1	1	1	1	1	1	1	0	0	1	7	32	19620.7	0.260081	0.00523025								1	1	Homologene group 2820	6	0	1	1	0	0	0	0	0	1	0	1	0	0	0	0	1	0	1
1448100_at	NM_133797	4833439L19Rik	RIKEN cDNA 4833439L19 gene	1	1	1	1	1	1	0	0	1	7	65	19546.5	0.393277	0.00523347								1	1	Homologene group 10720	6	0	1	1	0	0	0	0	0	1	0	1	0	0	0	0	1	0	1
1419181_at	NM_018759	Zfp326	zinc finger protein 326	1	1	1	1	1	1	0	0	1	7	17	19343.3	0.257353	0.00524003								1	1	Homologene group 10297	5	0	1	0	0	0	0	0	0	1	0	1	0	0	0	0	1	0	1
1451663_a_at	AF220019	Trim3	tripartite motif protein 3	1	1	1	1	1	1	0	0	1	7	25	19001.1	0.716667	0.00518732								1	1	Homologene group 21290	5	0	1	1	0	0	0	0	0	1	0	1	0	0	0	0	1	0	0
1457425_at	BE957378	---	Transcribed locus	1	1	1	1	1	1	0	0	1	7	23	18783.1	0.10989	0.00520996
1428543_at	AV305746	Ppat	Phosphoribosyl pyrophosphate amidotransferase	1	1	1	1	1	1	0	0	1	7	4	18746.7	0	0.00522736								1	1	Homologene group 68272	16	1	1	1	1	1	1	1	0	1	1	1	1	1	1	1	1	0	1
1456358_at	BM932547	Etv3	Ets variant gene 3	1	1	1	1	1	1	0	0	1	7	35	18743.3	0.295238	0.00523132								1	1	Homologene group 21085	4	0	1	1	0	0	0	0	0	0	0	0	0	0	0	0	1	0	1
1433838_at	BM228846	5830468K18Rik	RIKEN cDNA 5830468K18 gene	1	1	1	1	1	1	0	0	1	7	50	18735.1	0.435606	0.00518461
1429919_at	AK005775	1700008J08Rik	RIKEN cDNA 1700008J08 gene	1	1	1	1	1	1	0	0	1	7	15	18721.1	0.25	0.00521241
1424102_at	AV240631	Apg4b	APG4 (ATG4) autophagy-related homolog B (S. cerevisiae)	1	1	1	1	1	1	0	0	1	7	35	18614.6	0.242857	0.00523603
1454178_at	AK011565	2610027F03Rik	RIKEN cDNA 2610027F03 gene	1	1	1	1	1	1	0	0	1	7	9	18445.7	0	0.00519264
1454040_at	AK019984	5730591J02Rik	RIKEN cDNA 5730591J02 gene	1	1	1	1	1	1	0	0	1	7	8	18212.3	0.333333	0.00521824
1426973_at	AK004377	Gpr153	G protein-coupled receptor 153	1	1	1	1	1	1	0	0	1	7	10	17890.7	0	0.00520095								1	1	Homologene group 18662	5	0	1	1	0	0	0	0	0	1	0	1	0	0	0	0	1	0	0
1424620_at	AK013251	D13Wsu177e	DNA segment; Chr 13; Wayne State University 177; expressed	1	1	1	1	1	1	0	0	1	7	12	17630.5	0.0952381	0.00522968
1440349_at	AV271839	---	---	1	1	1	1	1	1	0	0	1	7	61	17572.8	0.588905	0.0051918
1443327_at	BB456021	D130043K22Rik	RIKEN cDNA D130043K22 gene	1	1	1	1	1	1	0	0	1	7	12	17536.6	0.178571	0.00522736								1	1	Homologene group 8878	8	0	1	1	1	0	0	1	0	1	0	1	0	0	0	0	1	0	1
1452600_at	AV280284	Taf6l	TAF6-like RNA polymerase II; p300/CBP-associated factor (PCAF)-associated factor	1	1	1	1	1	1	0	0	1	7	10	17501.3	0.333333	0.00522757								1	1	Homologene group 4728	5	0	1	1	0	0	0	0	0	1	0	1	0	0	0	0	1	0	0
1439935_at	BG067944	Gm99	gene model 99; (NCBI)	1	1	1	1	1	1	0	0	1	7	2	16748	0	0.00514494
1427212_at	BC027377	Mapkap1	mitogen-activated protein kinase associated protein 1	1	1	1	1	1	1	0	0	1	7	12	16661.6	0.222222	0.00521135								1	1	Homologene group 11473	7	0	1	1	1	0	0	1	0	1	0	1	0	0	0	0	0	0	1
1437105_at	BM246184	Jarid1a	jumonji; AT rich interactive domain 1A (Rbp2 like)	1	1	1	1	1	1	0	0	1	7	22	16497.2	0.294872	0.00522345								1	1	Homologene group 3419	5	0	1	0	1	0	0	1	0	1	0	0	0	0	0	0	0	0	1
1436648_at	BB251623	Nanos1	nanos homolog 1 (Drosophila)	1	1	1	1	1	1	0	0	1	7	21	16081.7	0.287879	0.0052346								1	0	Homologene group 18663	2	0	0	1	0	0	0	0	0	1	0	0	0	0	0	0	1	0	0
1421686_at	NM_021892	Rfrp	RFamide-related peptide	1	1	1	1	1	1	0	0	1	7	13	16014	0.205128	0.00522208
1424376_at	BC016250	Cdc42ep1	CDC42 effector protein (Rho GTPase binding) 1	1	1	1	1	1	1	0	0	1	7	72	15630.4	0.268707	0.00522874								1	1	Homologene group 5128	3	0	1	1	0	0	0	0	0	1	0	0	0	0	0	0	0	0	0
1456295_at	BB304874	B230114P17Rik	RIKEN cDNA B230114P17 gene	1	1	1	1	1	1	0	0	1	7	8	15380.3	0	0.0051869
1449338_at	BE692118	D10Ertd641e	DNA segment; Chr 10; ERATO Doi 641; expressed	1	1	1	1	1	1	0	0	1	7	11	15253.9	0.133333	0.00521011								1	1	Homologene group 11957	5	0	1	0	0	0	0	0	0	1	0	1	0	0	0	0	1	0	1
1428918_at	BB274851	1200016D23Rik	RIKEN cDNA 1200016D23 gene	1	1	1	1	1	1	0	0	1	7	3	15221.4	0	0.00520114
1448452_at	BG069095	Icsbp1	interferon consensus sequence binding protein 1	1	1	1	1	1	1	0	0	1	7	26	15134.9	0.294118	0.00521755
1447048_at	BE952599	6720458F09Rik	RIKEN cDNA 6720458F09 gene	1	1	1	1	1	1	0	0	1	7	51	15019.5	0.286022	0.00522318								1	1	Homologene group 6229	14	1	1	1	1	1	1	0	0	1	0	1	1	1	0	1	1	1	1
1428824_at	AK009106	2310003C23Rik	RIKEN cDNA 2310003C23 gene	1	1	1	1	1	1	0	0	1	7	6	14948.5	0.166667	0.00520957								1	1	Homologene group 41207	10	0	1	1	1	0	0	1	0	1	0	1	0	1	0	0	1	1	1
1417266_at	BC002073	Ccl6	chemokine (C-C motif) ligand 6	1	1	1	1	1	1	0	0	1	7	25	14760.3	0.417582	0.00522977									0	Homologene group 22507	0	0	0	1	0	0	0	0	0	0	0	0	0	0	0	0	0	0	0
1426662_at	AJ006215	Cmas	cytidine monophospho-N-acetylneuraminic acid synthetase	1	1	1	1	1	1	0	0	1	7	20	14502.9	0.153846	0.00521559								1	1	Homologene group 7670	8	0	1	1	1	0	0	1	0	1	0	1	0	0	0	0	1	0	1
1433628_at	BQ044689	Gm1	gene model 1; (NCBI)	1	1	1	1	1	1	0	0	1	7	51	14418.6	0.212121	0.00522769
1459769_at	AV047011	LOC433215	Hypothetical gene supported by AK076800; BC048609	1	1	1	1	1	1	0	0	1	7	98	14354.2	0.4	0.00518659
1418477_at	NM_010769	Matn1	matrilin 1; cartilage matrix protein 1	1	1	1	1	1	1	0	0	1	7	8	14249.8	0	0.00520665								1	1	Homologene group 1783	5	0	1	1	0	0	0	0	0	1	0	0	0	0	0	0	1	0	1
1425765_at	BC006659	Rrn3	RRN3 RNA polymerase I transcription factor homolog (yeast)	1	1	1	1	1	1	0	0	1	7	75	14197.5	0.482886	0.00518641								1	1	Homologene group 39531	16	1	1	1	1	1	1	1	0	1	1	1	1	1	1	1	1	1	0
1416603_at	NM_009079	Rpl22	ribosomal protein L22	1	1	1	1	1	1	0	0	1	7	9	14153.2	0.238095	0.00519541								1	0	Homologene group 37378	15	1	1	1	1	1	1	1	0	1	1	1	1	1	1	1	0	1	1
1429409_at	AK014932	4921520L01Rik	RIKEN cDNA 4921520L01 gene	1	1	1	1	1	1	0	0	1	7	38	14082.2	0.334282	0.00524035
1427613_at	AI449267	Mcpr1	cleft palate-related protein 1	1	1	1	1	1	1	0	0	1	7	79	14045.6	0.390338	0.00523158
1416243_a_at	NM_025592	Rpl35	ribosomal protein L35	1	1	1	1	1	1	0	0	1	7	10	13914.6	0.133333	0.00523263								1
1418931_at	NM_026328	Reg4	regenerating islet-derived family; member 4	1	1	1	1	1	1	0	0	1	7	36	13711.8	0.284127	0.00523575								1	1	Homologene group 41671	5	0	1	1	0	0	0	0	0	1	0	0	0	0	0	0	1	0	1
1428897_at	AK011611	2610029I01Rik	RIKEN cDNA 2610029I01 gene	1	1	1	1	1	1	0	0	1	7	8	13658.4	0.166667	0.00520706								1	1	Homologene group 44732	5	0	1	1	0	0	0	0	0	1	0	1	0	0	0	0	0	0	1
1436861_at	BG069762	Il7	interleukin 7	1	1	1	1	1	1	0	0	1	7	16	13568.3	0.0555556	0.00519896								1	1	Homologene group 680	3	0	0	1	0	0	0	0	0	1	0	0	0	0	0	0	1	0	0
1437152_at	BG072837	---	---	1	1	1	1	1	1	0	0	1	7	104	13498.9	0.302611	0.0052337
1436013_at	AI852434	G630023A01Rik	RIKEN cDNA G630023A01 gene	1	1	1	1	1	1	0	0	1	7	18	13403.2	0.282051	0.00522546
1433654_at	AV299787	Mgea5	meningioma expressed antigen 5 (hyaluronidase)	1	1	1	1	1	1	0	0	1	7	13	13401.4	0.047619	0.00521701								1	0	Homologene group 8154	8	1	1	1	1	0	0	1	0	1	0	1	0	0	0	0	1	0	1
1446111_at	BG069972	---	---	1	1	1	1	1	1	0	0	1	7	80	13400.4	0.458522	0.00518648
1429394_at	BB025778	A130010J15Rik	RIKEN cDNA A130010J15 gene	1	1	1	1	1	1	0	0	1	7	8	13322.2	0	0.00519518								1	1	Homologene group 17592	4	0	0	0	0	0	0	0	0	1	0	1	0	0	0	0	1	0	1
1430680_a_at	BC021356	1500041I23Rik	RIKEN cDNA 1500041I23 gene	1	1	1	1	1	1	0	0	1	7	25	13311.2	0.258333	0.00523961
1448922_at	NM_024438	Dusp19	dual specificity phosphatase 19	1	1	1	1	1	1	0	0	1	7	61	13284	0.361673	0.0052311								1	1	Homologene group 41565	7	0	1	1	0	0	0	0	0	1	0	1	0	1	0	0	1	0	1
1449519_at	NM_007836	Gadd45a	growth arrest and DNA-damage-inducible 45 alpha	1	1	1	1	1	1	0	0	1	7	64	13182.1	0.315854	0.00523127								1	1	Homologene group 1449	4	0	0	1	0	0	0	0	0	1	0	1	0	0	0	0	1	0	0
1451681_at	BC018263	CRAD-L	cis-retinol/3alpha hydroxysterol short-chain dehydrogenase-like	1	1	1	1	1	1	0	0	1	7	96	13133.3	0.418644	0.00518655
1418256_at	BI662291	Srf	serum response factor	1	1	1	1	1	1	0	0	1	7	13	13090.2	0.192308	0.00522683								1	1	Homologene group 31135	7	0	1	1	1	0	0	1	0	1	0	1	0	0	0	0	1	0	0
1453755_at	BM951302	Lsm11	U7 snRNP-specific Sm-like protein LSM11	1	1	1	1	1	1	0	0	1	7	9	13034.4	0.133333	0.00521359								1	1	Homologene group 32693	5	0	0	1	0	0	0	0	0	1	0	1	0	0	0	0	1	0	1
1421685_at	NM_027218	Clec4b	C-type lectin domain family 4; member b	1	1	1	1	1	1	0	0	1	7	37	12932.9	0.264822	0.00521946
1429095_at	AK006234	1700022C02Rik	RIKEN cDNA 1700022C02 gene	1	1	1	1	1	1	0	0	1	7	43	12858.6	0.455026	0.00517065
1449466_at	NM_011606	Clec3b	C-type lectin domain family 3; member b	1	1	1	1	1	1	0	0	1	7	10	12812.8	0.133333	0.00521718								1	1	Homologene group 31145	3	0	0	0	0	0	0	0	0	1	0	1	0	0	0	0	0	0	1
1452644_at	BG083854	Mbd3l2	methyl-CpG binding domain protein 3-like 2	1	1	1	1	1	1	0	0	1	7	25	12659.1	0.358333	0.00522116								1	1	Homologene group 44896	2	0	0	1	0	0	0	0	0	0	0	0	0	0	0	0	1	0	0
1429519_at	BB303906	Fpgt	fucose-1-phosphate guanylyltransferase	1	1	1	1	1	1	0	0	1	7	7	12566	0.166667	0.0051749								1	0	Homologene group 2847	3	1	0	1	0	0	0	0	0	1	0	1	0	0	0	0	0	0	0
1426468_at	AK002776	0610037L13Rik	RIKEN cDNA 0610037L13 gene	1	1	1	1	1	1	0	0	1	7	7	12564.5	0.333333	0.00511976								1	1	Homologene group 41206	11	1	1	1	1	0	0	1	0	1	0	1	0	1	0	0	1	1	1
1441304_at	BQ128572	---	---	1	1	1	1	1	1	0	0	1	7	17	12380.5	0.163636	0.00523969
1456545_at	AV247387	---	---	1	1	1	1	1	1	0	0	1	7	43	12340	0.328042	0.00522188
1441440_at	BB530484	Apg4c	APG4 (ATG4) autophagy-related homolog C (S. cerevisiae)	1	1	1	1	1	1	0	0	1	7	14	12171.1	0.222222	0.00522333
1441662_at	BB171122	---	---	1	1	1	1	1	1	0	0	1	7	38	12095.4	0.492754	0.00519984
1452255_at	BE914442	Fbxo38	F-box protein 38	1	1	1	1	1	1	0	0	1	7	56	11994.3	0.566845	0.0051782								1	1	Homologene group 34526	6	0	1	1	0	0	0	0	0	1	0	1	0	0	0	0	1	0	1
1423501_at	AA617392	Max	Max protein	1	1	1	1	1	1	0	0	1	7	92	11866.5	0.440476	0.00518653								1	1	Homologene group 1786	5	0	1	1	0	0	0	0	0	1	0	1	0	0	0	0	1	0	0
1426112_a_at	BC003824	---	---	1	1	1	1	1	1	0	0	1	7	9	11843.9	0.2	0.00521278
1432369_at	AK019394	3010027C24Rik	RIKEN cDNA 3010027C24 gene	1	1	1	1	1	1	0	0	1	7	56	11580.3	0.285714	0.00523037
1418718_at	BC019961	Cxcl16	chemokine (C-X-C motif) ligand 16	1	1	1	1	1	1	0	0	1	7	70	11505.2	0.354374	0.00523444								1	1	Homologene group 49694	4	0	1	1	0	0	0	0	0	1	0	0	0	0	0	0	1	0	0
1424855_at	BC025001	Thedc1	thioesterase domain containing 1	1	1	1	1	1	1	0	0	1	7	17	11444.8	0.279412	0.00523558
1438909_at	BB709277	C330023F11Rik	RIKEN cDNA C330023F11 gene	1	1	1	1	1	1	0	0	1	7	6	11351.7	0.4	0.00521609
1427666_a_at	AI021643	LOC333791	similar to T-cell receptor beta chain V region 86T1 precursor	1	1	1	1	1	1	0	0	1	7	32	11192.6	0.405242	0.00520924
1447353_at	BB711229	---	---	1	1	1	1	1	1	0	0	1	7	9	11128.4	0.266667	0.00522273
1417788_at	NM_011430	Sncg	synuclein; gamma	1	1	1	1	1	1	0	0	1	7	6	11073.5	0.333333	0.00521687								1	1	Homologene group 2322	6	0	1	1	0	0	0	0	0	1	0	1	0	0	0	0	1	0	1
1438052_at	BM239436	A130071D04Rik	RIKEN cDNA A130071D04 gene	1	1	1	1	1	1	0	0	1	7	11	10986.5	0.142857	0.00515759
1427042_at	BB127697	Mal2	mal; T-cell differentiation protein 2	1	1	1	1	1	1	0	0	1	7	42	10799.8	0.37	0.00522193								1	1	Homologene group 14167	5	0	1	1	0	0	0	0	0	1	0	0	0	0	0	0	1	0	1
1423798_a_at	BI693609	Sui1-rs1	suppressor of initiator codon mutations; related sequence 1 (S. cerevisiae)	1	1	1	1	1	1	0	0	1	7	8	10791.5	0	0.00518039
1418240_at	NM_010260	Gbp2	guanylate nucleotide binding protein 2	1	1	1	1	1	1	0	0	1	7	27	10603.1	0.323529	0.0051758								1	1	Homologene group 86912	3	0	0	1	0	0	0	0	0	1	0	0	0	0	0	0	1	0	0
1439797_at	AW046066	Ppard	peroxisome proliferator activator receptor delta	1	1	1	1	1	1	0	0	1	7	7	10444.2	0.047619	0.00521574								1	1	Homologene group 4544	6	0	1	1	0	0	0	0	0	1	0	1	0	0	0	0	1	0	1
1443939_at	BF021397	LOC230628	hypothetical LOC230628	1	1	1	1	1	1	0	0	1	7	20	10359.6	0.205128	0.00523
1449164_at	BC021637	Cd68	CD68 antigen	1	1	1	1	1	1	0	0	1	7	13	10166.5	0.214286	0.00520925								1	1	Homologene group 955	4	0	1	1	0	0	0	0	0	1	0	1	0	0	0	0	0	0	0
1450210_at	NM_009757	Bmp15	bone morphogenetic protein 15	1	1	1	1	1	1	0	0	1	7	10	10156.1	0.0666667	0.00521061								1	0	Homologene group 3977	5	0	1	1	0	0	0	0	0	1	0	1	0	0	0	0	1	0	1
1431482_at	AV153257	2900012M01Rik	RIKEN cDNA 2900012M01 gene	1	1	1	1	1	1	0	0	1	7	62	10050.2	0.372549	0.00520557
1453919_at	AU041304	2610028H24Rik	RIKEN cDNA 2610028H24 gene	1	1	1	1	1	1	0	0	1	7	13	9959.52	0.238095	0.00522264								1	0	Homologene group 50540	4	0	0	1	0	0	0	0	0	1	0	1	0	0	0	0	1	0	1
1435806_at	BB045538	D530033C11Rik	RIKEN cDNA D530033C11 gene	1	1	1	1	1	1	0	0	1	7	44	9729.54	0.349206	0.0052305
1420088_at	AI462015	---	---	1	1	1	1	1	1	0	0	1	7	26	9706.19	0.313846	0.00523901
1455372_at	BB770826	Cpeb3	Cytoplasmic polyadenylation element binding protein 3	1	1	1	1	1	1	0	0	1	7	25	9665.73	0.247619	0.0052256								1	1	Homologene group 40992	6	0	1	1	0	0	0	0	0	1	0	1	0	0	0	0	1	0	1
1449128_at	NM_025918	D11Ertd707e	DNA segment; Chr 11; ERATO Doi 707; expressed	1	1	1	1	1	1	0	0	1	7	10	9565	0.238095	0.00520864
1430506_at	BB440067	8430406P12Rik	RIKEN cDNA 8430406P12 gene	1	1	1	1	1	1	0	0	1	7	13	9506.32	0.178571	0.00522522
1416342_at	NM_011607	Tnc	tenascin C	1	1	1	1	1	1	0	0	1	7	39	9432.28	0.336032	0.00523797								1	1	Homologene group 55636	5	0	1	0	0	0	0	0	0	1	0	1	0	0	0	0	1	0	1
1428081_at	AK007786	Klhl21	kelch-like 21 (Drosophila)	1	1	1	1	1	1	0	0	1	7	14	9350.76	0.178571	0.00523387								1	1	Homologene group 8902	5	0	1	1	0	0	0	0	0	1	0	1	0	0	0	0	1	0	0
1421935_at	BG070206	---	---	1	1	1	1	1	1	0	0	1	7	26	9333.82	0.243077	0.00520872
1444652_at	BE982608	B830004H01Rik	RIKEN cDNA B830004H01 gene	1	1	1	1	1	1	0	0	1	7	37	9328.63	0.268421	0.00522143
1435769_at	AV228342	Akap9	A kinase (PRKA) anchor protein (yotiao) 9	1	1	1	1	1	1	0	0	1	7	14	9310.3	0.222222	0.005213								1	1	Homologene group 17517	6	0	1	1	0	0	0	0	0	1	0	1	0	0	0	0	1	0	1
1430356_at	AA880527	2210402A03Rik	RIKEN cDNA 2210402A03 gene	1	1	1	1	1	1	0	0	1	7	45	9293.21	0.258621	0.00522642
1450253_a_at	U11548	Map3k4	mitogen activated protein kinase kinase kinase 4	1	1	1	1	1	1	0	0	1	7	4	9254.27	0	0.00522131								1	1	Homologene group 31346	7	0	1	1	1	0	0	1	0	1	0	1	0	0	0	0	0	0	1
1435964_a_at	BB194075	---	---	1	1	1	1	1	1	0	0	1	7	20	9243.11	0.673684	0.00518578
1427081_at	BB246700	A630072M18Rik	RIKEN cDNA A630072M18 gene	1	1	1	1	1	1	0	0	1	7	14	9228.46	0.357143	0.00518402
1428613_at	AW105779	Ldhd	lactate dehydrogenase D	1	1	1	1	1	1	0	0	1	7	24	9136.86	0.552381	0.00519684									1	Homologene group 5536	13	1	1	1	0	1	0	0	0	1	1	1	0	1	1	1	1	1	1
1442122_at	BG793156	2010-09-06	Septin 6	1	1	1	1	1	1	0	0	1	7	53	9049.4	0.594758	0.00518628
1421907_at	BB760479	Pparbp	peroxisome proliferator activated receptor binding protein	1	1	1	1	1	1	0	0	1	7	7	8952.61	0	0.00520488
1437432_a_at	BM244351	Trim12	tripartite motif protein 12	1	1	1	1	1	1	0	0	1	7	48	8921.97	0.274823	0.00523495
1422071_at	AF026794	Lgals6	lectin; galactose binding; soluble 6	1	1	1	1	1	1	0	0	1	7	10	8900.37	0.238095	0.00522221
1432787_at	AK020112	6720420G18Rik	RIKEN cDNA 6720420G18 gene	1	1	1	1	1	1	0	0	1	7	47	8897.66	0.344729	0.00522749
1440335_at	AV020525	---	Transcribed locus	1	1	1	1	1	1	0	0	1	7	48	8869.72	0.521839	0.00517388
1419306_at	NM_025725	4921513E08Rik	RIKEN cDNA 4921513E08 gene	1	1	1	1	1	1	0	0	1	7	12	8854.01	0.107143	0.00522381
1441536_at	AV362707	Hmgcs1	3-hydroxy-3-methylglutaryl-Coenzyme A synthase 1	1	1	1	1	1	1	0	0	1	7	33	8847.92	0.557143	0.00519983								1
1420441_at	NM_007683	Cenpc1	centromere autoantigen C1	1	1	1	1	1	1	0	0	1	7	10	8793.36	0.380952	0.00516642								1	1	Homologene group 1371	5	0	1	1	0	0	0	0	0	1	0	0	0	0	0	0	1	0	1
1434263_at	AV307274	Fzr1	Fizzy/cell division cycle 20 related 1 (Drosophila)	1	1	1	1	1	1	0	0	1	7	5	8760.41	0.333333	0.00520512								1	1	Homologene group 9444	15	1	1	1	1	1	1	1	0	1	1	1	1	1	0	1	0	1	1
1428313_at	AK014904	Zswim3	zinc finger; SWIM domain containing 3	1	1	1	1	1	1	0	0	1	7	24	8758.66	0.355072	0.00523076								1	1	Homologene group 15436	5	0	1	1	0	0	0	0	0	1	0	0	0	0	0	0	1	0	1
1422041_at	NM_133209	Pilrb	paired immunoglobin-like type 2 receptor beta	1	1	1	1	1	1	0	0	1	7	32	8735.45	0.379032	0.00523748
1424022_at	BC022135	1700012B18Rik	RIKEN cDNA 1700012B18 gene	1	1	1	1	1	1	0	0	1	7	25	8692.94	0.323333	0.00523338
1444927_at	BG069414	---	---	1	1	1	1	1	1	0	0	1	7	16	8642.19	0.285714	0.00520862
1448302_at	AV281062	2410004N11Rik	RIKEN cDNA 2410004N11 gene	1	1	1	1	1	1	0	0	1	7	11	8626.7	0.0555556	0.00521135
1445170_at	AW488844	2700012I20Rik	RIKEN cDNA 2700012I20 gene	1	1	1	1	1	1	0	0	1	7	59	8621.87	0.433934	0.00517842
1451021_a_at	BI465857	Klf5	Kruppel-like factor 5	1	1	1	1	1	1	0	0	1	7	32	8614.32	0.226316	0.00523555								1	1	Homologene group 37520	6	0	1	1	0	0	0	0	0	1	0	1	0	0	0	0	1	0	1
1431837_at	AK004627	1200007C13Rik	RIKEN cDNA 1200007C13 gene	1	1	1	1	1	1	0	0	1	7	10	8612.75	0.0952381	0.00522652
1424990_at	BQ173909	D730049H07Rik	RIKEN cDNA D730049H07 gene	1	1	1	1	1	1	0	0	1	7	35	8580.49	0.245378	0.00522623
1448586_at	NM_015765	Hspa14	heat shock 70kDa protein 14	1	1	1	1	1	1	0	0	1	7	11	8566.55	0.266667	0.0052083								1	1	Homologene group 74307	6	0	1	1	0	0	0	0	0	1	0	1	0	0	0	0	1	0	1
1426189_at	AF357887	Dusp15	dual specificity phosphatase-like 15	1	1	1	1	1	1	0	0	1	7	47	8553.48	0.31828	0.00521872									1	Homologene group 33586	4	0	1	1	0	0	0	0	0	1	0	0	0	0	0	0	0	0	1
1432834_at	AK015095	Cpb2	carboxypeptidase B2 (plasma)	1	1	1	1	1	1	0	0	1	7	20	8456.85	0.333333	0.00521949								1	1	Homologene group 55610	7	1	1	1	0	0	0	0	0	1	0	1	0	0	0	0	1	0	1
1452329_at	BB821258	BC025458	cDNA sequence BC025458	1	1	0	1	1	1	0	1	1	7	9	8416.8	0.222222	0.0052131
1455170_at	BB250227	2810001G20Rik	RIKEN cDNA 2810001G20 gene	1	1	1	1	1	1	0	0	1	7	4	8413.71	0	0.00521128
1458156_at	BB548850	E230012J19Rik	RIKEN cDNA E230012J19 gene	1	1	1	1	1	1	0	0	1	7	68	8386.43	0.381916	0.0052333
1417028_a_at	BB283676	Trim2	tripartite motif protein 2	1	1	1	1	1	1	0	0	1	7	12	8379.08	0.651515	0.00517763								1	1	Homologene group 22882	4	0	0	0	0	0	0	0	0	1	0	1	0	0	0	0	1	0	1
1427229_at	BB123978	Hmgcr	3-hydroxy-3-methylglutaryl-Coenzyme A reductase	1	1	1	1	1	1	0	0	1	7	18	8379	0.622222	0.00517874								1	1	Homologene group 30994	17	1	1	1	1	1	1	1	0	1	1	1	1	1	1	1	1	1	1
1424692_at	BC004753	2810055F11Rik	RIKEN cDNA 2810055F11 gene	1	1	1	1	1	1	0	0	1	7	6	8378	0.333333	0.00520134								1	1	Homologene group 12100	6	0	1	1	0	0	0	0	0	1	0	1	0	0	0	0	1	0	1
1450246_at	NM_018876	Fut2	fucosyltransferase 2	1	1	1	1	1	1	0	0	1	7	5	8378	0.333333	0.00520018								1	1	Homologene group 10325	4	0	1	1	0	0	0	0	0	1	0	0	0	0	0	0	1	0	0
1445241_at	BB328987	Rab11fip4	RAB11 family interacting protein 4 (class II)	1	1	1	1	1	1	0	0	1	7	10	8187.27	0.288889	0.00522612								1	1	Homologene group 8803	7	1	1	1	0	0	0	0	0	1	0	1	0	0	0	0	1	0	1
1430101_at	BQ174423	6330406O05Rik	RIKEN cDNA 6330406O05 gene	1	1	1	1	1	1	0	0	1	7	4	8133.18	0	0.00518063
1452859_at	AK004803	1200016B10Rik	RIKEN cDNA 1200016B10 gene	1	1	1	1	1	1	0	0	1	7	66	8073.62	0.398671	0.00523414								1	1	Homologene group 32355	6	0	1	1	0	0	0	0	0	1	0	1	0	0	0	0	1	0	1
1424818_at	BC021379	Alg12	asparagine-linked glycosylation 12 homolog (yeast; alpha-1;6-mannosyltransferase)	1	1	1	1	1	1	0	0	1	7	9	8034.69	0.2	0.00521861								1	0	Homologene group 91150	0	0	0	0	0	0	0	0	0	0	0	0	0	0	0	0	0	0	1
1450700_at	BB012489	Cdc42ep3	CDC42 effector protein (Rho GTPase binding) 3	1	1	1	1	1	1	0	0	1	7	42	7908.8	0.355731	0.00522906								1	1	Homologene group 4708	5	0	1	0	0	0	0	0	0	1	0	1	0	0	0	0	1	0	1
1437533_at	BF134200	Birc4	Baculoviral IAP repeat-containing 4	1	1	1	1	1	1	0	0	1	7	44	7906.97	0.563077	0.00516697
1416788_a_at	NM_008323	Idh3g	isocitrate dehydrogenase 3 (NAD+); gamma	1	1	1	1	1	1	0	0	1	7	34	7870.58	0.561905	0.00519981								1	1	Homologene group 55803	8	1	1	1	1	0	0	1	0	1	0	1	0	1	0	0	0	0	0
1449277_at	NM_011888	Ccl19	chemokine (C-C motif) ligand 19	1	1	1	1	1	1	0	0	1	7	44	7832.1	0.404762	0.00523407								1
1417256_at	NM_008607	Mmp13	matrix metalloproteinase 13	1	1	1	1	1	1	0	0	1	7	11	7810.15	0.145455	0.00518856								1	1	Homologene group 20548	6	0	1	1	0	0	0	0	0	1	0	1	0	0	0	0	1	0	1
1437655_at	BB042982	D430020J02Rik	RIKEN cDNA D430020J02 gene	1	1	1	1	1	1	0	0	1	7	16	7806.56	0.2	0.00523351									0	Homologene group 104820	0	0	0	1	0	0	0	0	0	0	0	0	0	0	0	0	0	0	0
1425914_a_at	BC021410	Armcx1	armadillo repeat containing; X-linked 1	1	1	1	1	1	1	0	0	1	7	14	7589.95	0.357143	0.0052139								1	1	Homologene group 9589	3	0	1	1	0	0	0	0	0	1	0	0	0	0	0	0	0	0	0
1416413_at	NM_012007	Ctsj	cathepsin J	1	1	1	1	1	1	0	0	1	7	10	7526.1	0.333333	0.00518648									0	Homologene group 74991	1	0	0	0	0	0	0	0	0	0	0	0	0	1	0	0	0	1	0
1419655_at	NM_009389	Tle3	transducin-like enhancer of split 3; homolog of Drosophila E(spl)	1	1	1	1	1	1	0	0	1	7	73	7525.27	0.504348	0.0051792								1	1	Homologene group 21059	7	0	1	1	1	0	0	1	0	1	0	1	0	0	0	0	1	0	0
1451474_a_at	BC022679	Parp8	poly (ADP-ribose) polymerase family; member 8	1	1	1	1	1	1	0	0	1	7	33	7506.62	0.537879	0.00518584								1	1	Homologene group 11621	6	0	1	1	0	0	0	0	0	1	0	1	0	0	0	0	1	0	1
1449435_at	BC013619	B4galt3	UDP-Gal:betaGlcNAc beta 1;4-galactosyltransferase; polypeptide 3	1	1	1	1	1	1	0	0	1	7	5	7432.37	0.166667	0.00521816								1	1	Homologene group 48241	5	0	1	1	0	0	0	0	0	1	0	1	0	0	0	0	1	0	0
1438278_a_at	BB532946	BC003993	cDNA sequence BC003993	1	1	1	1	1	1	0	0	1	7	5	7368.21	0.666667	0.00517106								1
1452944_at	AK004030	Syngr2	synaptogyrin 2	1	1	1	1	1	1	0	0	1	7	10	7325.44	0.3	0.00523085								1	1	Homologene group 20987	4	0	1	0	0	0	0	0	0	1	0	1	0	0	0	0	1	0	0
1421728_at	NM_053008	Olig3	oligodendrocyte transcription factor 3	1	1	1	1	1	1	0	0	1	7	16	7318.76	0.225	0.00522535								1	1	Homologene group 14201	6	0	1	1	0	0	0	0	0	1	0	1	0	0	0	0	1	0	1
1427348_at	BC006817	BC036563	cDNA sequence BC036563	1	1	1	1	1	1	0	0	1	7	44	7263.95	0.328753	0.00523647
1426407_at	BI412951	1600010O03Rik	RIKEN cDNA 1600010O03 gene	1	1	1	1	1	1	0	0	1	7	7	7227.68	0.5	0.00521365
1425156_at	BC010229	9830147J24Rik	RIKEN cDNA 9830147J24 gene	1	1	1	1	1	1	0	0	1	7	33	7221.22	0.526316	0.00517774
1427159_at	AV374246	2500001H09Rik	RIKEN cDNA 2500001H09 gene	1	1	1	1	1	1	0	0	1	7	10	7201.74	0.111111	0.00523311
1438148_at	BB829808	Gm1960	gene model 1960; (NCBI)	1	1	1	1	1	1	0	0	1	7	3	7181.46	0	0.00520659
1420448_at	NM_029203	4930539I12Rik	RIKEN cDNA 4930539I12 gene	1	1	1	1	1	1	0	0	1	7	25	7091.29	0.495238	0.00520917
1451852_at	AF067060	MGI:2675349	2-cell-stage; variable group; member 3	1	1	1	1	1	1	0	0	1	7	12	6830.68	0.30303	0.0052325
1430378_at	AK013526	2900011G08Rik	RIKEN cDNA 2900011G08 gene	1	1	1	1	1	1	0	0	1	7	22	6811.43	0.294872	0.00522588
1456482_at	AA414954	Pik3r3	phosphatidylinositol 3 kinase; regulatory subunit; polypeptide 3 (p55)	1	1	1	1	1	1	0	0	1	7	12	6726.14	0.181818	0.00521138								1	1	Homologene group 2690	4	0	1	1	0	0	0	0	0	1	0	1	0	0	0	0	0	0	0
1451169_at	BC024503	Nomo1	nodal modulator 1	1	1	1	1	1	1	0	0	1	7	4	6640.3	0.333333	0.00518098								1	1	Homologene group 13810	11	1	1	1	1	0	0	1	0	1	0	1	0	1	0	0	1	1	1
1421288_at	NM_007975	F2rl3	coagulation factor II (thrombin) receptor-like 3	1	1	1	1	1	1	0	0	1	7	15	6569.75	0.361111	0.00522529								1	1	Homologene group 36148	5	0	1	0	0	0	0	0	0	1	0	1	0	0	0	0	1	0	1
1454052_at	AK015939	Hormad2	HORMA domain containing 2	1	1	1	1	1	1	0	0	1	7	19	6568.42	0.263736	0.00523839								1	1	Homologene group 45130	3	0	0	0	0	0	0	0	0	1	0	0	0	0	0	0	1	0	1
1440909_at	AV270586	Iigp5	interferon inducible GTPase family member 5	1	1	1	1	1	1	0	0	1	7	59	6559	0.564565	0.00518631
1429870_at	BB021125	C630040K21Rik	RIKEN cDNA C630040K21 gene	1	1	1	1	1	1	0	0	1	7	26	6454.4	0.243077	0.00521682
1429708_at	AA596846	Ndufa11	NADH dehydrogenase (ubiquinone) 1 alpha subcomplex 11	1	1	1	1	1	1	0	0	1	7	8	6371.33	0.321429	0.00522027								1
1445558_at	BB765023	---	---	1	1	1	1	1	1	0	0	1	7	6	6356.47	0	0.00519343
1423276_at	BG084606	Ildr1	immunoglobulin-like domain containing receptor 1	1	1	1	1	1	1	0	0	1	7	36	6318.16	0.373188	0.00520787								1	1	Homologene group 15892	5	0	0	1	0	0	0	0	0	1	0	1	0	0	0	0	1	0	1
1415970_at	NM_053071	Cox6c	cytochrome c oxidase; subunit VIc	1	1	1	1	1	1	0	0	1	7	8	6301.66	0.2	0.00521412								1
1451693_a_at	AF020738	Fgf12	fibroblast growth factor 12	1	1	1	1	1	1	0	0	1	7	19	6280.67	0.363636	0.00522073								1	1	Homologene group 10874	6	0	1	1	0	0	0	0	0	1	0	1	0	0	0	0	1	0	1
1419476_at	NM_021475	Adamdec1	ADAM-like; decysin 1	1	1	1	1	1	1	0	0	1	7	30	6280.19	0.529412	0.0052294								1	1	Homologene group 8711	4	0	1	1	0	0	0	0	0	1	0	0	0	0	0	0	1	0	0
1448891_at	BC016551	Msr2	macrophage scavenger receptor 2	1	1	1	1	1	1	0	0	1	7	6	6271.71	0.2	0.00522111
1435367_at	BQ177154	Mapk4	mitogen-activated protein kinase 4	1	1	1	1	1	1	0	0	1	7	11	6262.72	0.190476	0.00523005								1	0	Homologene group 2058	3	0	1	1	0	0	0	0	0	1	0	1	0	0	0	0	0	0	0
1423159_at	AI647805	---	---	1	1	1	1	1	1	0	0	1	7	5	6247.6	0	0.00520068
1428282_at	AK011899	Tbce	tubulin-specific chaperone e	1	1	1	1	1	1	0	0	1	7	5	6211.98	0.2	0.00522498								1	1	Homologene group 37744	13	1	1	1	1	0	0	1	0	1	1	1	0	1	1	0	1	1	1
1416428_at	NM_021513	Thap11	THAP domain containing 11	1	1	1	1	1	1	0	0	1	7	8	6110.83	0.285714	0.00521807								1	1	Homologene group 10726	5	0	1	1	0	0	0	0	0	1	0	1	0	0	0	0	1	0	0
1446809_at	BB175973	A230059L01Rik	RIKEN cDNA A230059L01 gene	1	1	1	1	1	1	0	0	1	7	41	6081.84	0.347578	0.00522727
1452071_at	BE655147	Slc4a4	Solute carrier family 4 (anion exchanger); member 4	1	1	1	1	1	1	0	0	1	7	3	6023.35	0	0.00521681								1	1	Homologene group 55776	10	0	1	1	0	1	1	0	0	1	0	1	1	0	0	1	1	0	1
1426237_at	BC021759	Sp2	Sp2 transcription factor	1	1	1	1	1	1	0	0	1	7	5	6011.23	0.6	0.00520579								1	1	Homologene group 2340	5	0	0	1	0	0	0	0	0	1	0	1	0	0	0	0	1	0	1
1456653_a_at	AV095209	Fthfsdc1	formyltetrahydrofolate synthetase domain containing 1	1	1	1	1	1	1	0	0	1	7	4	5961.19	0.333333	0.00520015
1449187_at	BB371842	Pdgfa	platelet derived growth factor; alpha	1	1	1	1	1	1	0	0	1	7	5	5949.51	0.2	0.00520501								1	1	Homologene group 32055	5	0	1	1	0	0	0	0	0	1	0	1	0	0	0	0	0	0	1
1449109_at	NM_007706	Socs2	suppressor of cytokine signaling 2	1	1	1	1	1	1	0	0	1	7	32	5947.06	0.310484	0.00523039								1
1452952_at	AK018518	9030418K01Rik	RIKEN cDNA 9030418K01 gene	1	1	1	1	1	1	0	0	1	7	13	5928.11	0.238095	0.00521629								1	1	Homologene group 49697	4	0	0	1	0	0	0	0	0	1	0	0	0	0	0	0	1	0	1
1431771_a_at	AK014712	Irak1bp1	interleukin-1 receptor-associated kinase 1 binding protein 1	1	1	1	1	1	1	0	0	1	7	18	5873.2	0.186813	0.00520622								1	1	Homologene group 11300	5	0	1	1	0	0	0	0	0	1	0	1	0	0	0	0	0	0	1
1434058_at	BB667459	Pip3ap	phosphatidylinositol-3-phosphatase associated protein	1	1	1	1	1	1	0	0	1	7	9	5797.07	0.25	0.00522276
1443930_at	AI644578	BC052046	cDNA sequence BC052046	1	1	1	1	1	1	0	0	1	7	4	5697.65	0.166667	0.00522065
1424235_at	BC002146	Ormdl2	ORM1-like 2 (S. cerevisiae)	1	1	1	1	1	1	0	0	1	7	11	5622.05	0.236364	0.0052399								1	1	Homologene group 39087	13	0	1	1	0	1	1	0	0	1	0	1	1	1	1	1	1	1	1
1443880_at	AW489513	7030401O21Rik	RIKEN cDNA 7030401O21 gene	1	1	1	1	1	1	0	0	1	7	9	5586.91	0.305556	0.00522915
1419594_at	NM_007800	Ctsg	cathepsin G	1	1	1	1	1	1	0	0	1	7	6	5496.82	0	0.00519229								1	1	Homologene group 105646	5	0	1	1	0	0	0	0	0	1	0	0	0	0	0	0	1	0	1
1460710_at	BB748999	---	---	1	1	1	1	1	1	0	0	1	7	13	5486.49	0.178571	0.00519782
1416069_at	NM_019703	Pfkp	phosphofructokinase; platelet	1	1	1	1	1	1	0	0	1	7	16	5472.23	0.391667	0.00520828								1	1	Homologene group 20579	11	1	1	1	1	1	0	1	0	1	0	1	1	0	0	1	1	0	0
1455034_at	BB703394	---	Transcribed locus	1	1	1	1	1	1	0	0	1	7	12	5364.74	0.227273	0.00521678
1428351_at	AK013149	2810423O19Rik	RIKEN cDNA 2810423O19 gene	1	1	1	1	1	1	0	0	1	7	3	5285.38	0	0.00519987
1447960_at	AI661648	9630017O17	hypothetical protein 9630017O17	1	1	1	1	1	1	0	0	1	7	21	5273.98	0.318182	0.00522341
1424830_at	BC027297	Ccnk	cyclin K	1	1	1	1	1	1	0	0	1	7	36	5256.69	0.350649	0.0052317								1	1	Homologene group 14748	6	0	0	1	0	0	1	0	0	1	0	1	0	0	0	0	1	0	1
1437963_at	BB425122	C530045E16Rik	RIKEN cDNA C530045E16 gene	1	1	1	1	1	1	0	0	1	7	36	5227.63	0.413043	0.00521186
1450272_at	NM_009403	Tnfsf8	tumor necrosis factor (ligand) superfamily; member 8	1	1	1	1	1	1	0	0	1	7	44	5126.78	0.345666	0.0052369								1	1	Homologene group 950	4	0	1	0	0	0	0	0	0	1	0	0	0	0	0	0	1	0	1
1459204_at	BG070275	---	---	1	1	1	1	1	1	0	0	1	7	5	5119.75	0.333333	0.00521222
1426895_at	BB579760	Zfp191	zinc finger protein 191	1	1	1	1	1	1	0	0	1	7	15	5109.45	0.333333	0.00523889								1	1	Homologene group 5068	4	0	1	1	0	0	0	0	0	1	0	0	0	0	0	0	1	0	0
1419425_at	NM_007726	Cnr1	cannabinoid receptor 1 (brain)	1	1	1	1	1	1	0	0	1	7	16	5097.83	0.2	0.00521878								1	0	Homologene group 7273	5	0	1	1	0	0	0	0	0	1	0	1	0	0	0	0	1	0	1
1424733_at	AF177211	P2ry14	purinergic receptor P2Y; G-protein coupled; 14	1	1	1	1	1	1	0	0	1	7	21	5068.86	0.380952	0.00522819								1	1	Homologene group 15769	6	0	1	1	0	0	0	0	0	1	0	1	0	0	0	0	1	0	1
1427032_at	AK019546	Herc4	hect domain and RLD 4	1	1	1	1	1	1	0	0	1	7	54	5045.36	0.520499	0.00517394									1	Homologene group 56715	8	0	1	1	1	0	0	1	0	1	0	1	0	0	0	0	1	0	1
1422177_at	BC003723	Il13ra2	interleukin 13 receptor; alpha 2	1	1	1	1	1	1	0	0	1	7	6	5003.83	0	0.00515889								1	1	Homologene group 534	5	0	1	1	0	0	0	0	0	1	0	1	0	0	0	0	0	0	1
1449675_at	AU015121	Ccnb1-rs1 /// Ccnb1	cyclin B1; related sequence 1 /// cyclin B1	1	1	1	1	1	1	0	0	1	7	62	4997.6	0.561905	0.00514591
1423774_a_at	BC005475	Prc1	protein regulator of cytokinesis 1	1	1	1	1	1	1	0	0	1	7	14	4982.56	0.417582	0.00521638								1	1	Homologene group 37868	13	0	1	1	1	0	1	1	0	1	1	1	0	1	1	0	1	1	1
1425054_a_at	BC024696	2510006D16Rik	RIKEN cDNA 2510006D16 gene	1	1	1	1	1	1	0	0	1	7	10	4978.1	0.142857	0.00521566								1	0	Homologene group 41314	4	0	1	0	1	0	0	0	0	1	0	1	0	0	0	0	0	0	1
1427090_at	BC026763	Zbed4	zinc finger; BED domain containing 4	1	1	1	1	1	1	0	0	1	7	17	4934.71	0.735294	0.00517381								1
1451973_at	BC019764	Ube1dc1	ubiquitin-activating enzyme E1-domain containing 1	1	1	1	1	1	1	0	0	1	7	3	4926.9	0	0.00515373
1422183_a_at	NM_007416	Adra1b	adrenergic receptor; alpha 1b	1	1	1	1	1	1	0	0	1	7	5	4871.32	0	0.00519478								1	1	Homologene group 55477	5	0	1	1	0	0	0	0	0	1	0	1	0	0	0	0	0	0	1
1419043_a_at	BM239828	Iigp1	interferon inducible GTPase 1	1	1	1	1	1	1	0	0	1	7	64	4747.76	0.551282	0.00518634									0	Homologene group 115687	-1	0	0	0	0	0	0	0	0	0	0	0	0	0	0	0	0	0	0
1426078_a_at	AF376726	Gpr108	G protein-coupled receptor 108	1	1	1	1	1	1	0	0	1	7	9	4722.22	0.4	0.00520869								1	1	Homologene group 32495	4	0	1	1	0	0	0	0	0	1	0	1	0	0	0	0	0	0	0
1457753_at	BI655907	Tlr13	toll-like receptor 13	1	1	1	1	1	1	0	0	1	7	31	4717.75	0.324731	0.005231
1448964_at	NM_009789	S100g	S100 calcium binding protein G	1	1	1	1	1	1	0	0	1	7	5	4695.37	0.2	0.00520905								1	1	Homologene group 36150	4	0	1	1	0	0	0	0	0	1	0	0	0	0	0	0	1	0	0
1438311_at	BB703633	2010002M12Rik	RIKEN cDNA 2010002M12 gene	1	1	1	1	1	1	0	0	1	7	13	4665.51	0.0952381	0.00521853									0	Homologene group 78213	4	0	1	1	0	0	0	0	0	1	0	1	0	0	0	0	1	0	0
1421699_at	NM_017468	Enam	enamelin	1	1	1	1	1	1	0	0	1	7	4	4598.16	0	0.00519457								1	1	Homologene group 9698	4	0	1	1	0	0	0	0	0	1	0	0	0	0	0	0	1	0	0
1415971_at	AW546141	Marcks	myristoylated alanine rich protein kinase C substrate	1	1	1	1	1	1	0	0	1	7	6	4592.99	0	0.00520306								1	1	Homologene group 40623	5	0	1	1	0	0	0	0	0	1	0	1	0	0	0	0	1	0	0
1423390_at	AV008871	Siah1a	seven in absentia 1A	1	1	1	1	1	1	0	0	1	7	11	4554.65	0.327273	0.00522288								1	1	Homologene group 20654	8	1	1	1	0	0	0	0	0	1	0	1	0	1	0	0	1	0	1
1427216_at	BF022827	MGI:2448469	limitin	1	1	1	1	1	1	0	0	1	7	57	4541.71	0.458111	0.00523099
1458953_at	BG066333	---	---	1	1	1	1	1	1	0	0	1	7	10	4529.09	0.4	0.00517456
1446038_at	BB124954	Ccr9	Chemokine (C-C motif) receptor 9	1	1	1	1	1	1	0	0	1	7	7	4518.57	0.166667	0.00519503								1	1	Homologene group 22546	6	0	1	1	0	0	0	0	0	1	0	1	0	0	0	0	1	0	1
1425479_at	BF160651	Smyd5	SET and MYND domain containing 5	1	1	1	1	1	1	0	0	1	7	25	4499.57	0.35	0.00523007								1
1434179_at	AV297525	Mll3	myeloid/lymphoid or mixed-lineage leukemia 3	1	1	1	1	1	1	0	0	1	7	7	4450.37	0.190476	0.00520921								1	1	Homologene group 46480	7	0	1	0	1	0	0	1	0	1	0	1	0	0	0	0	1	0	1
1431300_at	AK014022	3110007P09Rik	RIKEN cDNA 3110007P09 gene	1	1	1	1	1	1	0	0	1	7	11	4426.25	0.563636	0.00522359
1417700_at	NM_028238	Rab38	Rab38; member of RAS oncogene family	1	1	1	1	1	1	0	0	1	7	3	4403.15	0	0.00521106								1	1	Homologene group 21353	6	0	1	1	0	0	0	0	0	1	0	1	0	0	0	0	1	0	1
1427867_at	AJ002522	Myh1	Myosin; heavy polypeptide 1; skeletal muscle; adult	1	1	1	1	1	1	0	0	1	7	6	4350.55	0.0666667	0.0052125								1	1	Homologene group 117708	1	0	0	0	0	0	0	0	0	1	0	0	0	0	0	0	0	0	0
1418518_at	NM_011046	Furin	furin (paired basic amino acid cleaving enzyme)	1	1	1	1	1	1	0	1	0	7	16	4323.45	0.488889	0.005213								1	1	Homologene group 1930	9	1	1	1	1	0	0	1	0	1	0	1	0	0	0	0	1	0	1
1428417_at	BE198251	3110050N22Rik	RIKEN cDNA 3110050N22 gene	1	1	1	1	1	1	0	0	1	7	16	4321.53	0.355556	0.005223
1452190_at	AK011112	Prcp	prolylcarboxypeptidase (angiotensinase C)	1	1	1	1	1	1	0	0	1	7	38	4291.14	0.324324	0.00523375								1	1	Homologene group 55867	11	1	1	1	1	0	0	1	0	1	0	1	0	1	0	0	1	1	1
1458909_at	BF456247	1810010D01Rik /// LOC381935	RIKEN cDNA 1810010D01 gene /// hypothetical LOC381935	1	1	1	1	1	1	0	0	1	7	5	4287.22	0	0.00519753
1452091_a_at	BM228459	Rbm28	RNA binding motif protein 28	1	1	1	1	1	1	0	0	1	7	3	4270.2	0	0.00521529								1	1	Homologene group 7117	10	1	1	1	1	0	0	1	0	1	0	1	0	1	0	0	1	1	0
1460142_at	BG066861	Sv2c	Synaptic vesicle glycoprotein 2c	1	1	1	1	1	1	0	0	1	7	8	4265.56	0.2	0.00523073								1	1	Homologene group 57152	6	0	1	1	0	0	0	0	0	1	0	1	0	0	0	0	1	0	1
1419239_at	NM_011760	Zfp54	zinc finger protein 54	1	1	1	1	1	1	0	0	1	7	8	4261.94	0.4	0.00521648
1439153_at	AV274826	Ibrdc2	IBR domain containing 2	1	1	1	1	1	1	0	0	1	7	18	4261.35	0.454545	0.00522331
1451163_at	AF214013	Tinf2	Terf1 (TRF1)-interacting nuclear factor 2	1	1	1	1	1	1	0	0	1	7	3	4232.98	0	0.00520469								1	1	Homologene group 8264	4	0	1	1	0	0	0	0	0	1	0	0	0	0	0	0	1	0	0
1439693_a_at	BB504521	Fbxw16	F-box and WD-40 domain protein 16	1	1	1	1	1	1	0	0	1	7	24	4194.95	0.747253	0.00516131
1421093_at	NM_017394	Slc7a10	solute carrier family 7 (cationic amino acid transporter; y+ system); member 10	1	1	1	1	1	1	0	0	1	7	6	4191.66	0.533333	0.00521127								1	0	Homologene group 56767	5	0	1	1	0	0	0	0	0	1	0	1	0	0	0	0	1	0	1
1433530_at	BI694945	2210411K19Rik	RIKEN cDNA 2210411K19 gene	1	1	1	1	1	1	0	0	1	7	7	4191.18	0.5	0.00521691
1433847_at	BB098407	---	---	1	1	1	1	1	1	0	0	1	7	3	4190.54	0	0.00512845
1416930_at	NM_010742	Ly6d	lymphocyte antigen 6 complex; locus D	1	1	1	1	1	1	0	0	1	7	9	4190	0.6	0.00517741								1	1	Homologene group 2742	4	0	1	1	0	0	0	0	0	1	0	0	0	0	0	0	1	0	0
1428500_at	AK008985	2210419D22Rik	RIKEN cDNA 2210419D22 gene	1	1	1	1	1	1	0	0	1	7	4	4190	0	0.00517656
1430360_at	BG797253	4833412C15Rik	RIKEN cDNA 4833412C15 gene	1	1	1	1	1	1	0	0	1	7	4	4190	0	0.00517931
1428032_at	BC028780	Acvr1c	activin A receptor; type IC	1	1	1	1	1	1	0	0	1	7	4	4190	0.333333	0.0052107								1	1	Homologene group 26724	5	0	1	1	0	0	0	0	0	1	0	0	0	0	0	0	1	0	1
1419726_at	NM_010084	Adam18	a disintegrin and metalloprotease domain 18	1	1	1	1	1	1	0	0	1	7	4	4190	0	0.00516093								1	1	Homologene group 74941	4	0	1	1	0	0	0	0	0	1	0	0	0	0	0	0	1	0	0
1431948_a_at	AK016755	Pank2	pantothenate kinase 2 (Hallervorden-Spatz syndrome)	1	1	1	1	1	1	0	0	1	7	4	4190	0.5	0.00517596								1	0	Homologene group 65126	3	0	1	0	0	0	0	0	0	1	0	1	0	0	0	0	1	0	0
1434410_at	AV276428	BC043118	cDNA sequence BC043118	1	1	1	1	1	1	0	0	1	7	3	4190	0	0.00520012
1438512_at	AV360837	BC048679	cDNA sequence BC048679	1	1	1	1	1	1	0	0	1	7	3	4190	0	0.00521513
1436324_at	BB427728	4831403C07Rik	RIKEN cDNA 4831403C07 gene	1	1	1	1	1	1	0	0	1	7	3	4190	0.333333	0.00516905
1416877_a_at	AI594880	Mrpl51	mitochondrial ribosomal protein L51	1	1	1	1	1	1	0	0	1	7	2	4190	0	0.0051935								1	1	Homologene group 32317	5	0	0	1	0	0	0	0	0	1	0	1	0	0	0	0	1	0	1
1423746_at	BC016252	Txndc5	thioredoxin domain containing 5	1	1	1	1	1	1	0	0	1	7	2	4190	0	0.00517307								1	1	Homologene group 11125	5	0	0	0	1	0	0	0	0	1	0	1	0	0	0	0	1	0	1
1428811_at	AK011977	2610304F08Rik	RIKEN cDNA 2610304F08 gene	1	1	1	1	1	1	0	0	1	7	2	4190	0	0.00520779
1456288_at	BB134615	Slfn5	schlafen 5	1	1	1	1	1	1	0	0	1	7	31	4163.07	0.541935	0.00518577								1	0	Homologene group 18839	2	0	0	1	0	0	0	0	0	1	0	0	0	0	0	0	1	0	0
1423553_at	AK005688	Dnajb3	DnaJ (Hsp40) homolog; subfamily B; member 3	1	1	1	1	1	1	0	0	1	7	53	4146.06	0.470899	0.005227									1	Homologene group 56409	3	0	1	1	0	0	0	0	1	0	0	0	0	0	0	0	0	0	0
1416580_a_at	NM_019719	Stub1	STIP1 homology and U-Box containing protein 1	1	1	1	1	1	1	0	0	1	7	16	4086.97	0.3	0.00522672								1	1	Homologene group 4281	11	1	1	0	1	0	0	1	0	1	0	1	0	1	1	0	1	1	1
1460404_at	BC026917	0610007P08Rik	RIKEN cDNA 0610007P08 gene	1	1	1	1	1	1	0	0	1	7	22	4074.5	0.435897	0.00523639								1	1	Homologene group 32564	6	0	1	1	0	0	0	0	0	1	0	1	0	0	0	0	1	0	1
1429695_at	AK006830	Rasip1	Ras interacting protein 1	1	1	1	1	1	1	0	0	1	7	43	4071.75	0.316667	0.0052303								1	1	Homologene group 9847	5	0	1	1	0	0	0	0	0	1	0	1	0	0	0	0	0	0	1
1453568_at	BE633038	2310032F03Rik	RIKEN cDNA 2310032F03 gene	1	1	1	1	1	1	0	0	1	7	5	4056.96	0	0.00522173
1428267_at	AK010512	Dhx40	DEAH (Asp-Glu-Ala-His) box polypeptide 40	1	1	1	1	1	1	0	0	1	7	64	3944.36	0.554765	0.00516795								1	1	Homologene group 57000	6	0	1	1	0	0	0	0	0	1	0	1	0	0	0	0	1	0	1
1427983_at	AI504060	Suhw3	suppressor of hairy wing homolog 3 (Drosophila)	1	1	1	1	1	1	0	0	1	7	6	3942.42	0.333333	0.00523697
1436037_at	BB205589	Itga4	Integrin alpha 4	1	1	1	1	1	1	0	0	1	7	8	3906.9	0.5	0.00521179								1	1	Homologene group 37364	5	0	1	1	0	0	0	0	0	1	0	0	0	0	0	0	1	0	1
1455096_at	AW555664	Flrt2	Fibronectin leucine rich transmembrane protein 2	1	1	1	1	1	1	0	0	1	7	23	3838.52	0.461538	0.00522207								1	1	Homologene group 8291	6	0	1	1	0	0	0	0	0	1	0	1	0	0	0	0	1	0	1
1449494_at	AY026947	Rab3c	RAB3C; member RAS oncogene family	1	1	1	1	1	1	0	0	1	7	9	3806.4	0.6	0.00521817								1	1	Homologene group 23420	8	1	1	1	1	0	0	1	0	1	0	1	0	0	0	0	1	0	0
1449365_at	NM_053190	Edg8	endothelial differentiation; sphingolipid G-protein-coupled receptor; 8	1	1	1	1	1	1	0	0	1	7	6	3787.86	0	0.0052145
1432146_at	AK014942	Catsper3	cation channel; sperm associated 3	1	1	1	1	1	1	0	0	1	7	14	3718.15	0.2	0.00520988								1	1	Homologene group 12658	4	0	1	1	0	0	0	0	0	1	0	0	0	0	0	0	1	0	0
1438730_at	BB431371	BC028801	cDNA sequence BC028801	1	1	1	1	1	1	0	0	1	7	9	3717.45	0.3	0.00522938
1433842_at	BG069059	---	Transcribed locus; strongly similar to XP_346075.1 similar to FLI-LRR associated protein-1 [Rattus norvegicus]	1	1	1	1	1	1	0	0	1	7	13	3694	0.25	0.00521011
1423573_at	BB206480	Srd5a2l	steroid 5 alpha-reductase 2-like	1	1	1	1	1	1	0	0	1	7	48	3588.27	0.497354	0.00523177
1417292_at	NM_008330	Ifi47	interferon gamma inducible protein 47	1	1	1	1	1	1	0	0	1	7	25	3468.73	0.418301	0.005176									1	Homologene group 49169	2	0	1	1	0	0	0	0	0	0	0	0	0	0	0	0	0	0	0
1434913_at	BF471959	Hmgcll1	3-hydroxymethyl-3-methylglutaryl-Coenzyme A lyase-like 1	1	1	1	1	1	1	0	0	1	7	30	3466.88	0.653595	0.00519766								1	1	Homologene group 27863	6	0	1	1	0	0	0	0	0	1	0	1	0	0	0	0	0	1	1
1452604_at	BB667840	Stard13	serologically defined colon cancer antigen 13	1	1	1	1	1	1	0	0	1	7	2	3449.47	0	0.00515359								1	1	Homologene group 64844	9	1	1	1	1	0	0	1	0	1	0	1	0	0	0	0	1	0	1
1431572_at	AK009366	2310015K22Rik	RIKEN cDNA 2310015K22 gene	1	1	1	1	1	1	0	0	1	7	21	3446.28	0.318182	0.0052217
1446120_at	BB436278	4732477C12Rik	U2AF homology motif (UHM) kinase 1	1	1	1	1	1	1	0	0	1	7	10	3443.99	0.555556	0.00519181
1434584_a_at	BG069218	Pramel5	preferentially expressed antigen in melanoma like 5	1	1	1	1	1	1	0	0	1	7	7	3413.5	0.333333	0.00519586									0	Homologene group 88378	0	0	0	0	0	0	0	0	0	1	0	0	0	0	0	0	0	0	0
1428687_at	BG962236	4931408L03Rik	RIKEN cDNA 4931408L03 gene	1	1	1	1	1	1	0	0	1	7	6	3410.31	0.133333	0.00523072
1423815_at	BC018291	Ddx56	DEAD (Asp-Glu-Ala-Asp) box polypeptide 56	1	1	1	1	1	1	0	0	1	7	65	3393.43	0.528455	0.00517916								1	1	Homologene group 6498	16	1	1	1	1	1	1	1	0	1	1	1	1	1	1	1	1	1	0
1431927_at	AK018199	6330419D11Rik	RIKEN cDNA 6330419D11 gene	1	1	1	1	1	1	0	0	1	7	13	3348.89	0.190476	0.00520945
1460429_at	AK004547	Cdc5l	cell division cycle 5-like (S. pombe)	1	1	1	1	1	1	0	0	1	7	17	3329.35	0.422222	0.0051566								1	1	Homologene group 13291	14	1	1	1	1	0	1	1	0	1	1	1	0	1	1	0	1	1	1
1419165_at	D45210	Zfp260	zinc finger protein 260	1	1	1	1	1	1	0	0	1	7	28	3307.42	0.335979	0.00522517								1	1	Homologene group 40802	3	0	0	1	0	0	0	0	0	1	0	0	0	0	0	0	1	0	0
1415764_at	AK003350	5730454B08Rik	RIKEN cDNA 5730454B08 gene	1	1	1	1	1	1	0	0	1	7	34	3266.66	0.322638	0.00522435
1422816_a_at	NM_133250	Mutyh	mutY homolog (E. coli)	1	1	1	1	1	1	0	0	1	7	12	3205.95	0.727273	0.00519331								1	1	Homologene group 8156	8	0	1	1	0	0	1	0	0	1	1	1	0	0	0	0	1	0	1
1419536_a_at	NM_009045	Rela	v-rel reticuloendotheliosis viral oncogene homolog A (avian)	1	1	1	1	1	1	0	0	1	7	20	3149.47	0.252632	0.00522146								1	1	Homologene group 32064	7	0	1	1	1	0	0	1	0	1	0	1	0	0	0	0	1	0	0
1450653_at	NM_030237	MGI:1930801	spermatogenic Zip 1	1	1	1	1	1	1	0	0	1	7	13	3130.44	0.692308	0.00519721
1441198_at	BB311524	Zfp39	zinc finger protein 39	1	1	1	1	1	1	0	0	1	7	3	3123.75	0	0.00522171								1	0	Homologene group 69102	0	0	0	1	0	0	0	0	0	0	0	0	0	0	0	0	0	0	0
1423970_at	BE335845	Thoc3	THO complex 3	1	1	1	1	1	1	0	0	1	7	10	3086.82	0.355556	0.00520184								1	1	Homologene group 12505	10	0	1	1	1	0	0	1	0	1	0	1	0	1	0	0	1	1	1
1431920_a_at	AK008082	2010004A03Rik	RIKEN cDNA 2010004A03 gene	1	1	1	1	1	1	0	0	1	7	9	3065.79	0.333333	0.00523376
1418309_at	AB013898	Tnfrsf11b	tumor necrosis factor receptor superfamily; member 11b (osteoprotegerin)	1	1	1	1	1	1	0	0	1	7	2	3038.95	0	0.00521144								1	1	Homologene group 1912	5	0	1	1	0	0	0	0	0	1	0	0	0	0	0	0	1	0	1
1448124_at	NM_010368	Gusb	glucuronidase; beta	1	1	1	1	1	1	0	0	1	7	56	3032.72	0.713012	0.00518636								1	1	Homologene group 37271	9	1	1	1	1	0	0	1	0	1	0	1	0	0	0	0	1	0	1
1425228_a_at	AY037862	Dguok	deoxyguanosine kinase	1	1	1	1	1	1	0	0	1	7	25	2994.36	0.533333	0.00519725								1	1	Homologene group 8456	7	0	1	1	0	0	0	0	0	1	0	1	0	1	0	0	1	1	0
1453768_a_at	AK005776	5430432M24Rik	RIKEN cDNA 5430432M24 gene	1	0	1	1	1	1	0	1	1	7	18	2967.78	0.355556	0.00520664
1441161_at	BB307791	B230216G23Rik	RIKEN cDNA B230216G23 gene	1	1	1	1	1	1	0	0	1	7	26	2955.81	0.417582	0.00521847								1	1	Homologene group 79576	4	0	1	1	0	0	0	0	0	1	0	0	0	0	0	0	1	0	0
1432962_at	AK011527	2610024D14Rik	RIKEN cDNA 2610024D14 gene	1	1	1	1	1	1	0	0	1	7	29	2901.38	0.457143	0.00520555
1438048_at	BB531986	Myct1	Myc target 1	1	1	1	1	1	1	0	0	1	7	35	2837.5	0.381513	0.0052328								1	0	Homologene group 11833	5	0	1	1	0	0	0	0	0	1	0	1	0	0	0	0	1	0	1
1418649_at	BB284358	Egln3	EGL nine homolog 3 (C. elegans)	1	1	1	1	1	1	0	0	1	7	30	2817.01	0.470588	0.0052236								1	1	Homologene group 32531	5	0	0	1	0	0	0	0	0	1	0	1	0	0	0	0	1	0	1
1427514_at	BC019591	---	---	1	1	1	1	1	1	0	0	1	7	6	2752.62	0.166667	0.00521185
1433646_at	BB667079	Mrps27	mitochondrial ribosomal protein S27	1	1	1	1	1	1	0	0	1	7	7	2663.6	0.190476	0.00522684								1	1	Homologene group 41006	6	0	1	1	0	0	0	0	0	1	0	1	0	0	0	0	1	0	1
1440214_at	BM243939	A630001G21Rik	RIKEN cDNA A630001G21 gene	1	1	1	1	1	1	0	0	1	7	10	2653.13	0.4	0.00521679									0	Homologene group 79992	0	0	0	1	0	0	0	0	0	0	0	0	0	0	0	0	0	0	0
1415920_at	NM_031249	Cstf2t	cleavage stimulation factor; 3' pre-RNA subunit 2; tau	1	1	1	1	1	1	0	0	1	7	11	2641.81	0.333333	0.00521736								1	1	Homologene group 80230	7	1	0	1	1	0	1	1	0	1	0	0	0	0	0	0	1	0	0
1418982_at	BC011118	---	---	1	1	1	1	1	1	0	0	1	7	10	2606.89	0.238095	0.0052162
1452281_at	Z11664	Sos2	Son of sevenless homolog 2 (Drosophila)	1	1	1	1	1	1	0	0	1	7	2	2580.69	0	0.00519618								1	0	Homologene group 38253	5	0	1	0	1	0	0	1	0	1	0	1	0	0	0	0	0	0	1
1450622_at	NM_009954	Bcar1	breast cancer anti-estrogen resistance 1	1	1	1	1	1	1	0	0	1	7	8	2557.41	0.4	0.00520582								1	1	Homologene group 7674	6	0	1	1	0	0	0	0	0	1	0	1	0	0	0	0	1	0	1
1453663_at	AK016565	4932442E05Rik	RIKEN cDNA 4932442E05 gene	1	1	1	1	1	1	0	0	1	7	12	2516.36	0.333333	0.00521608
1424937_at	BC024138	2310076L09Rik	RIKEN cDNA 2310076L09 gene	1	1	1	1	1	1	0	0	1	7	46	2506.35	0.376068	0.00521876								1	1	Homologene group 41654	4	0	1	1	0	0	0	0	0	1	0	0	0	0	0	0	1	0	0
1422108_at	NM_080464	Ppp1r3a	protein phosphatase 1; regulatory (inhibitor) subunit 3A	1	1	1	1	1	1	0	0	1	7	2	2497.48	0	0.00519241								1	1	Homologene group 48124	6	0	1	1	0	0	0	0	0	1	0	1	0	0	0	0	1	0	1
1417653_at	NM_013645	Pvalb	parvalbumin	1	1	1	1	1	1	0	0	1	7	38	2462.18	0.354196	0.00523257								1	1	Homologene group 2137	6	0	1	1	0	0	0	0	0	1	0	1	0	0	0	0	1	0	1
1426654_at	BI687848	Zc3hc1	zinc finger; C3HC type 1	1	1	1	1	1	1	0	0	1	7	5	2429.56	0.4	0.00521256								1	1	Homologene group 32315	6	0	1	1	0	0	0	0	0	1	0	1	0	0	0	0	1	0	1
1451907_a_at	BC024961	Plekha4	pleckstrin homology domain containing; family A (phosphoinositide binding specific) member 4	1	1	1	1	1	1	0	0	1	7	7	2395.06	0.166667	0.00517284									0	Homologene group 89173	0	0	0	0	0	0	0	0	0	0	0	0	0	0	0	0	1	0	0
1418793_at	AV320631	Idua	iduronidase; alpha-L-	1	1	1	1	1	1	0	0	1	7	25	2371.29	0.552381	0.00522347								1	1	Homologene group 170	5	0	0	0	1	0	0	1	0	1	0	1	0	0	0	0	0	0	1
1437469_at	BM230508	A030007D23Rik	RIKEN cDNA A030007D23 gene	1	1	1	1	1	1	0	0	1	7	11	2362.33	0.272727	0.00522601
1424184_at	BC026559	Acadvl	acyl-Coenzyme A dehydrogenase; very long chain	1	1	1	1	1	1	0	0	1	7	9	2330.85	0.4	0.00520135								1	1	Homologene group 5	7	1	1	1	1	0	0	1	0	1	0	1	0	0	0	0	0	0	0
1456267_at	BG074151	Mef2b	RIKEN cDNA 2310045N01 gene	1	1	1	1	1	1	0	0	1	7	76	2309.21	0.519889	0.0051792								1	0	Homologene group 48381	4	0	1	1	0	0	0	0	0	1	0	1	0	0	0	0	1	0	0
1452809_at	AK018541	9030607L17Rik	RIKEN cDNA 9030607L17 gene	1	1	1	1	1	1	0	0	1	7	5	2227.63	0.333333	0.00515072								1	1	Homologene group 50465	4	0	1	1	0	0	0	0	0	1	0	0	0	0	0	0	1	0	0
1451178_at	BC022162	Mrpl53	mitochondrial ribosomal protein L53	1	1	1	1	1	1	0	0	1	7	3	2220.43	0.333333	0.00521001								1	1	Homologene group 12270	6	0	1	1	0	0	0	0	0	1	0	1	0	0	0	0	1	0	1
1429093_at	BI110088	1700027M01Rik	RIKEN cDNA 1700027M01 gene	1	1	1	1	1	1	0	0	1	7	6	2216.01	0.333333	0.00520453
1424261_at	BC003258	4930488P06Rik	RIKEN cDNA 4930488P06 gene	1	1	1	1	1	1	0	0	1	7	9	2206.06	0.194444	0.00522149
1451407_at	BC004806	Jam4	junction adhesion molecule 4	1	1	1	1	1	1	0	0	1	7	11	2174.65	0.47619	0.00520809
1434788_at	BQ175713	D930050A07Rik	RIKEN cDNA D930050A07 gene	1	1	1	1	1	1	0	0	1	7	15	2168.52	0.5	0.00520157
1417234_at	NM_008606	Mmp11	matrix metalloproteinase 11	1	1	1	1	1	1	0	0	1	7	9	2139.01	0.25	0.00521792								1	1	Homologene group 38116	6	0	1	1	0	0	0	0	0	1	0	1	0	0	0	0	1	0	1
1432586_at	AI452210	5730596P11Rik	RIKEN cDNA 5730596P11 gene	1	1	1	1	1	1	0	0	1	7	10	2113.59	0.466667	0.00522162
1429017_at	AK010198	2310076G09Rik	RIKEN cDNA 2310076G09 gene	1	1	1	1	1	1	0	0	1	7	10	2075.15	0.466667	0.00520529
1418680_at	NM_008223	Serpind1	serine (or cysteine) proteinase inhibitor; clade D; member 1	1	1	1	1	1	1	0	0	1	7	8	2054.47	0.321429	0.00521197								1	0	Homologene group 36018	4	0	0	1	0	0	0	0	0	1	0	1	0	0	0	0	1	0	1
1424086_at	BC025514	D130038B21Rik	RIKEN cDNA D130038B21 gene	1	1	1	1	1	1	0	0	1	7	21	2008.2	0.690476	0.00517806
1426374_at	AK010825	2410166I05Rik	RIKEN cDNA 2410166I05 gene	1	1	1	1	1	1	0	0	1	7	2	1987.66	0	0.0051955
1428661_at	AK013272	2810439M11Rik	RIKEN cDNA 2810439M11 gene	1	1	1	1	1	1	0	0	1	7	37	1924.26	0.393393	0.00523521
1425802_a_at	AF329487	BB219290	expressed sequence BB219290	1	1	1	1	1	1	0	0	1	7	33	1897.29	0.590476	0.00519212
1436353_at	AU018634	A230046K03Rik	RIKEN cDNA A230046K03 gene	1	1	1	1	1	1	0	0	1	7	4	1893.29	0	0.00520735								1	0	Homologene group 9077	5	0	1	1	1	0	0	0	0	1	0	0	0	0	0	0	1	0	1
1431528_at	BE225800	5830427D02Rik	RIKEN cDNA 5830427D02 gene	1	1	1	1	1	1	0	0	1	7	3	1712.83	0	0.00516757
1426077_at	AB065134	MGI:2388042	dopamine beta-hydroxylase-like 1	1	1	1	1	1	1	0	0	1	7	22	1676.64	0.614719	0.00518575
1436243_at	AW046024	A930004K21Rik	RIKEN cDNA A930004K21 gene	1	1	1	1	1	1	0	0	1	7	38	1606.08	0.415584	0.00522223
1447767_at	BB129647	---	Transcribed locus	1	1	1	1	1	1	0	0	1	7	21	1552.81	0.333333	0.00521364
1435527_at	BB533448	1500041O16Rik	RIKEN cDNA 1500041O16 gene	1	1	1	1	1	1	0	0	1	7	4	1545.06	0.166667	0.00520392
1417446_at	NM_009195	Slc12a4	solute carrier family 12; member 4	1	1	1	1	1	1	0	0	1	7	2	1527.77	0	0.00517126								1	1	Homologene group 21056	8	1	1	1	1	0	0	1	0	1	0	1	0	0	0	0	0	0	1
1424025_at	BC013529	BC013529	cDNA sequence BC013529	1	1	1	1	1	1	0	0	1	7	43	1522.83	0.696667	0.00517891								1	1	Homologene group 16347	6	0	1	1	0	0	0	0	0	1	0	1	0	0	0	0	1	0	1
1418919_at	NM_028232	Sgol1	shugoshin-like 1 (S. pombe)	1	0	1	1	1	1	0	1	1	7	17	1480.68	0.654412	0.00513399								1	1	Homologene group 23642	6	0	1	1	0	0	0	0	0	1	0	1	0	0	0	0	1	0	1
1460199_a_at	BE688382	Pafah1b1	platelet-activating factor acetylhydrolase; isoform 1b; beta1 subunit	1	1	1	1	1	1	0	0	1	7	26	1454.86	0.571429	0.00522583								1	1	Homologene group 371	11	1	1	1	1	0	0	1	0	1	1	1	0	0	1	0	1	0	1
1431629_at	AK020284	9130221D24Rik	RIKEN cDNA 9130221D24 gene	1	1	1	1	1	1	0	0	1	7	11	1415.12	0.380952	0.00522235								1	0	Homologene group 9786	2	0	0	0	0	0	0	0	0	1	0	1	0	0	0	0	1	0	0
1417789_at	NM_011330	Ccl11	small chemokine (C-C motif) ligand 11	1	1	1	1	1	1	0	0	1	7	7	1390.51	0.333333	0.00520602								1	1	Homologene group 7929	3	0	0	1	0	0	0	0	0	1	0	0	0	0	0	0	1	0	0
1456406_at	BE988787	Nrxn2	neurexin II	1	1	1	1	1	1	0	0	1	7	8	1385.03	0.321429	0.00521814								1	1	Homologene group 86984	5	0	1	1	0	0	0	0	0	1	0	1	0	0	0	0	1	0	0
1459223_at	BB376007	B930095G15Rik	RIKEN cDNA B930095G15 gene	1	1	1	1	1	1	0	0	1	7	11	1382.28	0.533333	0.00521499
1439894_at	BB253214	A730056I06Rik	RIKEN cDNA A730056I06 gene	1	1	1	1	1	1	0	0	1	7	4	1366.24	0	0.00519826
1430894_at	AK017439	5530401N12Rik	RIKEN cDNA 5530401N12 gene	1	1	1	1	1	1	0	0	1	7	4	1359.29	0	0.00516429
1429734_at	AK014608	4632434I11Rik	RIKEN cDNA 4632434I11 gene	1	1	1	1	1	1	0	0	1	7	10	1357.5	0.2	0.00522314								1	1	Homologene group 51655	4	0	1	1	0	0	0	0	0	1	0	0	0	0	0	0	1	0	0
1451196_at	BC025125	Ypel5	yippee-like 5 (Drosophila)	1	1	1	1	1	1	0	0	1	7	2	1321.11	0	0.00521528								1	1	Homologene group 41097	8	1	1	1	1	0	0	1	0	1	0	0	0	0	0	0	1	0	1
1424320_a_at	BC008598	Traf7	Tnf receptor-associated factor 7	1	1	1	1	1	1	0	0	1	7	27	1321.04	0.68661	0.00518579								1	1	Homologene group 12998	6	0	1	1	0	0	0	0	0	1	0	1	0	0	0	0	1	0	1
1422891_at	U13648	H2-Ea	histocompatibility 2; class II antigen E alpha	1	1	1	1	1	1	0	0	1	7	8	1319.26	0.333333	0.00519136								1	1	Homologene group 7751	4	0	1	1	0	0	0	0	0	1	0	0	0	0	0	0	1	0	0
1439106_at	AV320128	Zfp462	zinc finger protein 462	1	1	1	1	1	1	0	0	1	7	2	1287.88	0	0.00518585								1	1	Homologene group 41430	6	0	1	1	0	0	0	0	0	1	0	1	0	0	0	0	1	0	1
1435108_at	BG295243	Arhgap22	Rho GTPase activating protein 22	1	1	1	1	1	1	0	0	1	7	6	1265.33	0.5	0.00520511								1	1	Homologene group 23292	5	0	0	1	0	0	0	0	0	1	0	1	0	0	0	0	1	0	1
1420549_at	NM_010259	Gbp1	guanylate nucleotide binding protein 1	1	1	1	1	1	1	0	0	1	7	16	1244.91	0.533333	0.00516661								1
1416663_at	NM_025358	Ndufa9	NADH dehydrogenase (ubiquinone) 1 alpha subcomplex; 9	1	1	1	1	1	1	0	0	1	7	3	1235.11	0.666667	0.0051921								1	1	Homologene group 3666	12	1	1	0	1	0	0	1	0	1	1	1	0	1	1	0	1	1	1
1459897_a_at	AI507307	MGI:2446326	suprabasin	1	1	1	1	1	1	0	0	1	7	12	1234.29	0.727273	0.00519113
1446941_at	BG066222	Slk	STE20-like kinase (yeast)	1	1	1	1	1	1	0	0	1	7	26	1199.19	0.485714	0.00521882								1	1	Homologene group 22515	8	1	1	1	1	0	0	1	0	1	0	1	0	0	0	0	0	0	1
1418621_at	NM_021518	Rab2	RAB2; member RAS oncogene family	1	1	1	1	1	1	0	0	1	7	19	1162.07	0.385965	0.00522672
1423107_at	AK010432	Ube2b	ubiquitin-conjugating enzyme E2B; RAD6 homology (S. cerevisiae)	1	1	1	1	1	1	0	0	1	7	9	1161.53	0.638889	0.0051421								1	1	Homologene group 101298	11	0	1	1	0	1	1	0	0	1	1	1	1	0	1	1	1	0	0
1435267_at	BB041868	A430108E01Rik	RIKEN cDNA A430108E01 gene	1	1	1	1	1	1	0	0	1	7	4	1158.33	0.333333	0.00522005
1446251_at	BB016902	4930565A17	hypothetical protein 4930565A17	1	1	1	1	1	1	0	0	1	7	7	1152.19	0.3	0.00521331
1442075_at	BE991175	AI314604	Expressed sequence AI314604	1	1	1	1	1	1	0	0	1	7	16	1103.74	0.464286	0.00520601
1423349_at	AA510713	Socs5	suppressor of cytokine signaling 5	1	1	1	1	1	1	0	0	1	7	5	1088.85	0.6	0.00521499								1	1	Homologene group 10495	6	0	1	1	0	0	0	0	0	1	0	1	0	0	0	0	1	0	1
1450548_at	NM_008310	Htr1f	5-hydroxytryptamine (serotonin) receptor 1F	1	1	1	1	1	1	0	0	1	7	11	1080.04	0.6	0.00518555								1	1	Homologene group 37361	5	0	0	1	0	0	0	0	0	1	0	1	0	0	0	0	1	0	1
1424680_at	BC025893	BB146404	expressed sequence BB146404	1	1	1	1	1	1	0	0	1	7	3	1053.35	0	0.00521645
1451255_at	BC004672	MGI:1927471	liver-specific bHLH-Zip transcription factor	1	1	1	1	1	1	0	0	1	7	20	1029.43	0.549451	0.00519179
1428499_at	BQ265914	2810454L23Rik	RIKEN cDNA 2810454L23 gene	1	1	1	1	1	1	0	0	1	7	6	1018.48	0.333333	0.00521091
1453907_at	AK021138	C030041B07Rik	RIKEN cDNA C030041B07 gene	1	1	1	1	1	1	0	0	1	7	4	1011.9	0	0.0052086
1422566_at	NM_011549	Tcfeb	transcription factor EB	1	1	1	1	1	1	0	0	1	7	14	1011.26	0.32967	0.00522965								1	1	Homologene group 5182	7	1	1	1	0	0	0	0	0	1	0	1	0	0	0	0	1	0	1
1429977_at	BG797916	9030425L15Rik	RIKEN cDNA 9030425L15 gene	1	1	1	1	1	1	0	0	1	7	3	889.264	0	0.00516202
1435597_at	BB431627	Gm17	gene model 17; (NCBI)	1	1	1	1	1	1	0	0	1	7	20	856.336	0.333333	0.00520582
1451562_at	BC006662	---	---	1	1	1	1	1	1	0	0	1	7	13	851.778	0.611111	0.0051755
1460651_at	AF036907	Lat	linker for activation of T cells	1	1	1	1	1	1	0	0	1	7	2	832.853	0	0.0051709								1	1	Homologene group 7811	4	0	1	1	0	0	0	0	0	1	0	0	0	0	0	0	1	0	0
1417950_a_at	NM_013474	---	---	1	1	1	1	1	1	0	0	1	7	23	812.481	0.551282	0.00520329
1418465_at	NM_008677	Ncf4	neutrophil cytosolic factor 4	1	1	1	1	1	1	0	0	1	7	8	796.438	0.392857	0.00521477								1	1	Homologene group 525	6	0	1	1	0	0	0	0	0	1	0	1	0	0	0	0	1	0	1
1435522_a_at	BQ044335	2310016E02Rik	RIKEN cDNA 2310016E02 gene	1	1	1	1	1	1	0	0	1	7	3	740.702	0	0.00517328
1433021_at	AK017927	5830413G11Rik	RIKEN cDNA 5830413G11 gene	1	1	1	1	1	1	0	0	1	7	13	709.23	0.380952	0.00521127
1449386_at	NM_013786	Hsd17b9	hydroxysteroid (17-beta) dehydrogenase 9	1	1	1	1	1	1	0	0	1	7	28	708.356	0.720588	0.0051921
1454054_at	AK015488	4930459I23Rik	RIKEN cDNA 4930459I23 gene	1	1	1	1	1	1	0	0	1	7	21	651.092	0.487179	0.0052003
1429196_at	BB431654	5830411O09Rik	RIKEN cDNA 5830411O09 gene	1	1	1	1	1	1	0	0	1	7	14	648.198	0.32967	0.0052269
1452622_a_at	AA201054	Tradd	TNFRSF1A-associated via death domain	1	1	1	1	1	1	0	0	1	7	11	600.718	0.218182	0.00520868								1	1	Homologene group 2807	6	0	1	1	0	0	0	0	0	1	0	1	0	0	0	0	1	0	1
1428425_at	AK014063	3110018K12Rik	RIKEN cDNA 3110018K12 gene	1	1	1	1	1	1	0	0	1	7	7	576.472	0.190476	0.00521169
1452846_at	AK003571	Ppfia4	protein tyrosine phosphatase; receptor type; f polypeptide (PTPRF); interacting protein (liprin); alpha 4	1	1	1	1	1	1	0	0	1	7	24	556.827	0.557971	0.00522612								1	0	Homologene group 66200	3	0	1	1	0	0	0	0	0	1	0	0	0	0	0	0	0	0	1
1451498_at	BC004853	BC004853	cDNA sequence BC004853	1	1	1	1	1	1	0	0	1	7	9	540.446	0.9	0.00520353
1416644_a_at	NM_009153	Sema3b	sema domain; immunoglobulin domain (Ig); short basic domain; secreted; (semaphorin) 3B	1	1	1	1	1	1	0	0	1	7	2	537.951	0	0.00519792								1	1	Homologene group 20972	5	0	1	1	0	0	0	0	0	1	0	1	0	0	0	0	1	0	0
1451062_a_at	AV327933	Pex2	peroxin 2	1	1	1	1	1	1	0	0	1	7	5	530.521	0.4	0.00522842								1	1	Homologene group 269	10	0	1	1	1	0	0	1	0	1	0	1	0	1	0	0	1	1	1
1434826_at	AW124912	AI256775	expressed sequence AI256775	1	1	1	1	1	1	0	0	1	7	13	526.208	0.474359	0.00521466
1450344_a_at	NM_011196	Ptger3	prostaglandin E receptor 3 (subtype EP3)	1	1	1	1	1	1	0	0	1	7	16	499.899	0.466667	0.0052292								1	1	Homologene group 105703	2	0	0	1	0	0	0	0	0	0	0	0	0	0	0	0	1	0	0
1423572_at	BB485989	Bcl2l2	Bcl2-like 2	1	1	1	1	1	1	0	0	1	7	10	480.383	0.392857	0.00520337								1	1	Homologene group 2989	2	0	0	1	0	0	0	0	0	1	0	0	0	0	0	0	0	0	0
1455176_a_at	BF457392	---	---	1	1	1	1	1	1	0	0	1	7	11	468.378	0.266667	0.00519844
1456481_at	BB525078	D9Ertd280e	DNA segment; Chr 9; ERATO Doi 280; expressed	1	1	1	1	1	1	0	0	1	7	12	427.988	0.466667	0.00520334
1439263_at	BB388301	Fin15	fibroblast growth factor inducible 15	1	1	1	1	1	1	0	0	1	7	3	422.912	0	0.0052153
1430186_at	AK009298	2310011G06Rik	RIKEN cDNA 2310011G06 gene	1	1	1	1	1	1	0	0	1	7	11	415.893	0.563636	0.00523197
1421617_at	NM_134252	Trpm8	transient receptor potential cation channel; subfamily M; member 8	1	1	1	1	1	1	0	0	1	7	7	394.919	0.428571	0.00521228								1	1	Homologene group 23433	4	0	1	1	0	0	0	0	0	1	0	0	0	0	0	0	0	0	1
1434139_at	BB026163	Parp11	poly (ADP-ribose) polymerase family; member 11	1	1	1	1	1	1	0	0	1	7	26	392.79	0.729231	0.00517816								1	1	Homologene group 10680	5	0	1	1	0	0	0	0	0	1	0	0	0	0	0	0	1	0	1
1451011_at	BF449729	Zfp358	zinc finger protein 358	1	1	1	1	1	1	0	0	1	7	18	391.463	0.45098	0.00522685								1	1	Homologene group 9996	5	0	1	1	1	0	0	0	0	1	0	0	0	0	0	0	1	0	0
1430900_at	AK019590	4930430O22Rik	RIKEN cDNA 4930430O22 gene	1	1	1	1	1	1	0	0	1	7	3	381.432	0	0.005205
1448127_at	BB758819	Rrm1	ribonucleotide reductase M1	1	1	1	1	1	1	0	0	1	7	8	373.923	0.642857	0.0051704								1	1	Homologene group 806	18	1	1	1	1	1	1	1	1	1	1	1	1	1	1	1	1	1	1
1451873_a_at	U58993	Smad5	MAD homolog 5 (Drosophila)	1	0	1	1	1	1	0	1	1	7	3	365.495	0.666667	0.00520957								1	0	Homologene group 4313	5	0	1	1	0	0	0	0	0	1	0	1	0	0	0	0	1	0	1
1443977_at	BB538930	E130014H10Rik	RIKEN cDNA E130014H10 gene	1	1	1	1	1	1	0	0	1	7	4	349.679	0	0.00517779
1428511_at	AK005277	Phkg2	phosphorylase kinase; gamma 2 (testis)	1	1	1	1	1	1	0	0	1	7	21	348.904	0.5	0.00522881								1	1	Homologene group 47915	8	1	1	1	1	0	0	1	0	1	0	1	0	0	0	0	1	0	0
1430914_at	BB025171	5330426L24Rik	RIKEN cDNA 5330426L24 gene	1	1	1	1	1	1	0	0	1	7	14	345.09	0.642857	0.00521268
1433962_at	BB131965	6720458F09Rik	RIKEN cDNA 6720458F09 gene	1	1	1	1	1	1	0	0	1	7	35	335.887	0.619048	0.00514219								1	1	Homologene group 6229	14	1	1	1	1	1	1	0	0	1	0	1	1	1	0	1	1	1	1
1450491_at	D16338	Ptger1	prostaglandin E receptor 1 (subtype EP1)	1	1	1	1	1	1	0	0	1	7	2	334.579	0	0.00517765								1	1	Homologene group 738	5	0	1	1	0	0	0	0	0	1	0	1	0	0	0	0	1	0	0
1421042_at	NM_008487	Arhgef2	rho/rac guanine nucleotide exchange factor (GEF) 2	1	1	1	1	1	1	0	0	1	7	17	324.036	0.381818	0.00521398								1	1	Homologene group 3468	4	0	1	1	0	0	0	0	0	1	0	1	0	0	0	0	0	0	0
1428342_at	BB667699	Rcor3	REST corepressor 3	1	1	1	1	1	1	0	0	1	7	5	293.756	0.6	0.00520664								1	1	Homologene group 69249	7	0	1	0	1	0	0	1	0	1	0	1	0	0	0	0	1	0	1
1422562_at	NM_019662	Rrad	Ras-related associated with diabetes	1	1	1	1	1	1	0	0	1	7	10	282.776	0.555556	0.00520722								1	1	Homologene group 3071	8	0	1	1	1	0	0	1	0	1	0	1	0	0	0	0	1	0	1
1436315_at	BF468324	Myst3	MYST histone acetyltransferase (monocytic leukemia) 3	1	1	1	1	1	1	0	0	1	7	4	281.39	0.5	0.00520249								1	1	Homologene group 4924	6	0	0	1	1	0	0	0	0	1	0	1	0	0	0	0	1	0	1
1419944_at	AU015121	---	---	1	1	1	1	1	1	0	0	1	7	39	280.416	0.731225	0.00514568
1421344_a_at	NM_010590	Jub	ajuba	1	1	1	1	1	1	0	0	1	7	5	279.25	0	0.00519763								1	1	Homologene group 7789	4	0	1	1	0	0	0	0	0	1	0	1	0	0	0	0	0	0	0
1416943_at	NM_009455	Ube2e1	ubiquitin-conjugating enzyme E2E 1; UBC4/5 homolog (yeast)	1	1	1	1	1	1	0	0	1	7	2	273.651	0	0.00521206								1	1	Homologene group 84372	9	0	1	0	1	0	0	1	0	1	0	1	0	1	0	0	1	1	1
1454837_at	BB514333	Cln6	ceroid-lipofuscinosis; neuronal 6	1	1	1	1	1	1	0	0	1	7	2	262.479	0	0.00518698								1	1	Homologene group 9898	5	0	1	1	0	0	0	0	0	1	0	0	0	0	0	0	1	0	1
1438604_at	BF319676	Atp8b3	ATPase; Class I; type 8B; member 3	1	1	1	1	1	1	0	0	1	7	4	260.591	0	0.00520545								1	0	Homologene group 19034	4	0	1	1	0	0	0	0	0	1	0	1	0	0	0	0	0	0	1
1435105_at	BG066986	1110061N23Rik	RIKEN cDNA 1110061N23 gene	1	1	1	1	1	1	0	0	1	7	23	259.07	0.774704	0.00517817
1449892_at	NM_026092	Lyzl1	lysozyme-like 1	1	1	1	1	1	1	0	0	1	7	5	234.543	0.666667	0.00520245								1	1	Homologene group 81913	7	0	1	1	1	0	0	1	0	1	0	1	0	0	0	0	1	0	0
1452388_at	AW763765	Hspa1a	heat shock protein 1A	1	1	1	1	1	1	0	0	1	7	8	181.286	0.266667	0.00520651								1	1	Homologene group 74294	9	0	1	1	1	1	0	0	0	1	0	1	1	1	0	1	0	0	0
1425081_at	BE651907	Zfp286	zinc finger protein 286	1	1	1	1	1	1	0	0	1	7	3	168.345	0	0.00521979								1	1	Homologene group 56892	4	0	1	1	0	0	0	0	0	1	0	0	0	0	0	0	1	0	0
1460453_at	BM220475	Tagap1	T-cell activation GTPase activating protein 1	1	1	1	1	1	1	0	0	1	7	12	166.277	0.714286	0.00522001
1427817_at	M11024	---	---	1	1	1	1	1	1	0	0	1	7	12	166.277	0.714286	0.00522001
1449496_at	NM_025929	2010109I03Rik	RIKEN cDNA 2010109I03 gene	1	1	1	1	1	1	0	0	1	7	8	161.148	0.5	0.00517601
1429152_at	AI509716	Zkscan1	zinc finger with KRAB and SCAN domains 1	1	1	1	1	1	1	0	0	1	7	3	154.817	0.333333	0.00522707								1	0	Homologene group 34523	3	0	1	1	0	0	0	0	0	1	0	0	0	0	0	0	1	0	0
1425049_at	AB067530	Oas1h	2'-5' oligoadenylate synthetase 1H	1	1	1	1	1	1	0	0	1	7	19	152.989	0.818713	0.00517809									0	Homologene group 77345	0	0	0	1	0	0	0	0	0	0	0	0	0	0	0	0	0	0	0
1426954_at	BE915274	Trim33	tripartite motif protein 33	1	1	1	1	1	1	0	0	1	7	20	148.335	0.784211	0.00517375								1	1	Homologene group 9296	8	0	1	1	1	0	0	1	0	1	0	1	0	0	0	0	1	0	1
1416023_at	NM_010174	Fabp3	fatty acid binding protein 3; muscle and heart	1	1	1	1	1	1	0	0	1	7	12	147.941	0.47619	0.00522301								1	1	Homologene group 68379	7	0	1	1	0	0	0	1	0	1	0	1	0	0	0	0	1	0	1
1450788_at	NM_009117	---	---	1	1	1	1	1	1	0	0	1	7	4	139.824	0.666667	0.00517837
1452163_at	BB151715	Ets1	E26 avian leukemia oncogene 1; 5' domain	1	1	1	1	1	1	0	0	1	7	5	126.954	0.166667	0.00521931								1	1	Homologene group 3837	5	0	1	1	0	0	0	0	0	1	0	1	0	0	0	0	0	0	1
1456802_at	AV045338	Rnf133	ring finger protein 133	1	1	1	1	1	1	0	0	1	7	14	125.291	0.769231	0.00517799								1	0	Homologene group 44549	2	0	0	1	0	0	0	0	0	1	0	0	0	0	0	0	1	0	0
1452592_at	AV066880	Mgst2	microsomal glutathione S-transferase 2	1	1	1	1	1	1	0	0	1	7	8	123.08	0.5	0.00518618								1	1	Homologene group 1811	5	0	0	1	0	0	0	0	0	1	0	1	0	0	0	0	1	0	1
1448460_at	NM_007394	Acvr1	activin A receptor; type 1	1	1	1	1	1	1	0	0	1	7	2	120.325	0	0.00520031								1	1	Homologene group 7	8	0	1	1	1	0	0	1	0	1	0	1	0	0	0	0	1	0	1
1448618_at	NM_080638	Mvp	major vault protein	1	1	1	1	1	1	0	0	1	7	20	119.394	0.736842	0.00517773								1	1	Homologene group 3752	6	0	1	1	0	0	0	0	0	1	0	1	0	0	0	0	1	0	1
1419018_at	NM_008955	Psx1	placenta specific homeobox 1	1	1	1	1	1	1	0	0	1	7	9	113.09	0.694444	0.00520136
1421773_at	NM_007959	Etsrp71	ets related protein 71	1	1	1	1	1	1	0	0	1	7	13	106.371	0.571429	0.00521903
1422287_at	NM_008833	Phxr2	per-hexamer repeat gene 2	1	1	1	1	1	1	0	0	1	7	7	91.6026	0.428571	0.00520937
1429431_at	AK009564	Zfpn1a5	zinc finger protein; subfamily 1A; 5	1	1	1	1	1	1	0	0	1	7	18	89.5985	0.6	0.00522314
1418966_a_at	AK014521	Dcbld1	discoidin; CUB and LCCL domain containing 1	1	1	1	1	1	1	0	0	1	7	8	85.9134	0.5	0.0052013								1	0	Homologene group 12010	5	0	1	1	0	0	0	0	0	1	0	1	0	0	0	0	1	0	1
1428090_at	AK013131	2810422B04Rik	RIKEN cDNA 2810422B04 gene	1	1	1	1	1	1	0	0	1	7	3	82.6825	0.333333	0.00519951
1436513_at	BM208226	3526402J09Rik	RIKEN cDNA 3526402J09 gene	1	1	1	1	1	1	0	0	1	7	6	82.6425	0.666667	0.00522397
1436184_at	BM117370	Gm632	gene model 632; (NCBI)	1	1	1	1	1	1	0	0	1	7	13	79.5894	0.910256	0.00517799
1429574_at	AK009020	Clic3	chloride intracellular channel 3	1	1	1	1	1	1	0	0	1	7	8	78.5308	0.4	0.00520478								1	1	Homologene group 3432	4	0	1	0	0	0	0	0	0	1	0	1	0	0	0	0	1	0	0
1417349_at	NM_019788	Pldn	pallidin	1	1	1	1	1	1	0	0	1	7	2	76.9081	0	0.00518633								1	1	Homologene group 40841	5	0	1	1	0	0	0	0	0	1	0	1	0	0	0	0	0	0	1
1419747_at	NM_007493	Asgr2	asialoglycoprotein receptor 2	1	1	1	1	1	1	0	0	1	7	3	73.3331	0	0.00519088								1	1	Homologene group 912	3	0	0	1	0	0	0	0	0	1	0	0	0	0	0	0	1	0	0
1436346_at	AV246882	Cd109	CD109 antigen	1	1	1	1	1	1	0	0	1	7	18	51.4414	0.527273	0.00521372								1	1	Homologene group 25183	7	1	1	1	0	0	0	1	0	1	0	0	0	0	0	0	1	0	1
1451271_a_at	BG070487	Acat1	acetyl-Coenzyme A acetyltransferase 1	1	1	1	1	1	1	0	0	1	7	25	48.8513	0.666667	0.00519181								1	1	Homologene group 6	17	1	1	1	1	1	1	1	0	1	1	1	1	1	1	1	1	1	1
1417633_at	NM_011435	Sod3	superoxide dismutase 3; extracellular	1	1	1	1	1	1	0	0	1	7	4	48.3717	0.333333	0.00519274								1	1	Homologene group 2334	6	0	1	1	0	0	0	0	0	1	0	1	0	0	0	0	1	0	1
1416671_a_at	NM_053177	Mcoln1	mucolipin 1	1	1	1	1	1	1	0	0	1	7	5	44.6397	0.166667	0.00519779								1	1	Homologene group 10744	6	0	1	1	0	0	0	0	0	1	0	1	0	0	0	0	1	0	1
1419674_a_at	NM_007876	Dpep1	dipeptidase 1 (renal)	1	1	1	1	1	1	0	0	1	7	10	43.1766	0.238095	0.00522185								1	1	Homologene group 80192	9	0	1	1	1	1	1	1	0	1	0	1	0	0	1	0	0	0	0
1419658_at	NM_010398	C920025E04Rik	RIKEN cDNA C920025E04 gene	1	1	1	1	1	1	0	0	1	7	6	41.6293	0.666667	0.00517339									0	Homologene group 113594	3	0	0	1	0	0	0	0	0	1	0	1	0	0	0	0	1	0	0
1458323_at	BB257479	E130014H08Rik	RIKEN cDNA E130014H08 gene	1	1	1	1	1	1	0	0	1	7	8	33.0242	0.833333	0.00521944
1424717_at	BC026790	Misc12	MIS12 homolog (yeast)	1	1	1	1	1	1	0	0	1	7	27	32.6107	0.628571	0.00516122
1416253_at	BC013898	Cdkn2d	cyclin-dependent kinase inhibitor 2D (p19; inhibits CDK4)	1	1	1	1	1	1	0	0	1	7	27	32.6097	0.75	0.00514555								1
1420336_at	NM_025629	Thsd6	thrombospondin; type I domain containing 6	1	1	1	1	1	1	0	0	1	7	11	31.928	0.607143	0.00516103
1436040_at	BI180630	2310005L22Rik	RIKEN cDNA 2310005L22 gene	1	1	1	1	1	1	0	0	1	7	10	31.3918	0.238095	0.00514522
1428791_at	BB183512	Ube2h	ubiquitin-conjugating enzyme E2H	1	1	1	1	1	1	0	0	1	7	7	31.1586	0.666667	0.00521502								1	1	Homologene group 103894	7	0	1	0	1	0	0	1	0	1	0	1	0	0	0	0	1	0	1
1457550_at	BB371633	9530059O14Rik	RIKEN cDNA 9530059O14 gene	1	1	1	1	1	1	0	0	1	7	4	28.5638	0	0.00518552
1460709_a_at	BG071718	Bat5	HLA-B associated transcript 5	1	1	1	1	1	1	0	0	1	7	4	28.4628	0.333333	0.00516614								1	1	Homologene group 10904	8	1	1	1	1	0	0	1	0	1	0	1	0	0	0	0	1	0	0
1427006_at	BB339051	Rapgef1	Rap guanine nucleotide exchange factor (GEF) 1	1	1	1	1	1	1	0	0	1	7	4	24.8608	0.5	0.00521057								1	1	Homologene group 50501	5	0	1	0	0	0	0	0	0	1	0	1	0	0	0	0	1	0	1
1419955_at	AW539211	---	---	1	1	1	1	1	1	0	0	1	7	2	23.2638	0	0.00521213
1436435_at	BB277190	9530026P05Rik	RIKEN cDNA 9530026P05 gene	1	1	1	1	1	1	0	0	1	7	27	16.96	0.75	0.0051668
1429714_at	BB822050	Sumf2 /// LOC381750	sulfatase modifying factor 2 /// similar to Sulfatase modifying factor 2 precursor (C-alpha-formyglycine-generating enzyme 2)	1	1	1	1	1	1	0	0	1	7	5	15.9173	0.333333	0.00520519
1423783_at	BC024469	Tor2a	torsin family 2; member A	1	1	1	1	1	1	0	0	1	7	14	15.7768	0.923077	0.00517372								1	1	Homologene group 25260	6	0	1	1	0	0	0	0	0	1	0	1	0	0	0	0	1	0	1
1451898_a_at	AF363972	Sema6c	sema domain; transmembrane domain (TM); and cytoplasmic domain; (semaphorin) 6C	1	1	1	1	1	1	0	0	1	7	7	14.8031	0.619048	0.00522101								1	0	Homologene group 7931	4	0	1	1	0	0	0	0	0	1	0	1	0	0	0	0	1	0	0
1434402_at	BQ176258	1110053F04Rik	RIKEN cDNA 1110053F04 gene	1	1	1	1	1	1	0	0	1	7	22	14.5077	0.722944	0.00516682
1460702_at	AK007514	1810015M01Rik	RIKEN cDNA 1810015M01 gene	1	1	1	1	1	1	0	0	1	7	9	14.3408	0.527778	0.00521831
1450027_at	BB528350	Sdc3	syndecan 3	1	1	1	1	1	1	0	0	1	7	7	9.40749	0.761905	0.00522393								1	1	Homologene group 7965	6	0	1	1	0	0	0	0	0	1	0	1	0	0	0	0	1	0	1
1449432_a_at	NM_013783	Mell1	mel transforming oncogene-like 1	1	1	1	1	1	1	0	0	1	7	4	8.50581	0.833333	0.00522485
1433474_at	BB377340	Edil3	EGF-like repeats and discoidin I-like domains 3	1	1	1	1	1	1	0	0	1	7	5	6.71197	0.333333	0.00520175								1	1	Homologene group 21166	5	0	1	0	0	0	0	0	0	1	0	1	0	0	0	0	1	0	1
1417800_at	AF072521	Parp2	poly (ADP-ribose) polymerase family; member 2	1	1	1	1	1	1	0	0	1	7	6	5.92975	0.8	0.00520576								1	0	Homologene group 4004	8	0	1	1	0	0	0	0	0	1	1	1	0	1	1	0	1	1	0
1452472_at	AJ428064	Tmem7	transmembrane protein 7	1	1	1	1	1	1	0	0	1	7	18	5.26397	0.823529	0.00516688
1426690_a_at	AI326423	Srebf1	sterol regulatory element binding factor 1	1	1	1	1	1	1	0	0	1	7	9	4.16584	0.833333	0.00519171								1	1	Homologene group 3079	7	1	1	1	1	0	0	1	0	1	0	1	0	0	0	0	0	0	0
1421644_at	NM_011409	Slfn3	schlafen 3	1	1	1	1	1	1	0	0	1	7	15	3.27218	0.933333	0.00517799
1434472_at	AV287497	5031436O03Rik	RIKEN cDNA 5031436O03 gene	1	1	1	1	1	1	0	0	1	7	16	3.17596	0.833333	0.00521427
1434487_at	AV334508	Mef2d	Myocyte enhancer factor 2D	1	1	1	1	1	1	0	0	1	7	3	2.90051	0	0.00518582								1	0	Homologene group 4327	5	1	0	1	0	0	0	0	0	1	0	1	0	0	0	0	1	0	1
1451648_a_at	BC022108	Folr2	folate receptor 2 (fetal)	1	1	1	1	1	1	0	0	1	7	5	2.28071	0.666667	0.00519959								1	1	Homologene group 627	4	0	1	1	0	0	0	0	0	1	0	0	0	0	0	0	1	0	0
1429952_at	AV265561	Mospd4	motile sperm domain containing 4	1	1	1	1	1	1	0	0	1	7	2	1.95396	0	0.00515358									0	Homologene group 19187	0	0	0	1	0	0	0	0	0	0	0	0	0	0	0	0	0	0	0
1423807_a_at	BC021347	Calm2	calmodulin 2	1	1	1	1	1	1	0	0	1	7	13	1.51793	0.722222	0.00520344								1
1444692_at	BB295954	---	---	1	1	1	1	1	1	0	0	1	7	5	1.5	0.333333	0.000228624
1425374_at	AB067534	Oas3	2'-5' oligoadenylate synthetase 3	1	1	1	1	1	1	0	0	1	7	6	1.49815	0.733333	0.00516656								1	0	Homologene group 4510	2	0	1	0	0	0	0	0	0	1	0	0	0	0	0	0	1	0	0
1423539_at	BM239600	Pms2	postmeiotic segregation increased 2 (S. cerevisiae)	1	1	1	1	1	1	0	0	1	7	3	1.46527	0.666667	0.00517119								1	1	Homologene group 450	16	1	1	1	1	1	1	1	0	1	1	1	1	1	1	1	1	1	0
1419001_at	NM_007519	Baat	bile acid-Coenzyme A: amino acid N-acyltransferase	1	1	1	1	1	1	0	0	1	7	2	1	0	0.000228519								1	0	Homologene group 1286	3	0	1	1	0	0	0	0	0	1	0	0	0	0	0	0	0	0	1
1448798_at	NM_133867	Eps8l3	ESP8-like 3	1	1	1	1	1	1	0	0	1	7	2	1	0	0.00512839								1	1	Homologene group 15878	4	0	1	1	0	0	0	0	0	1	0	0	0	0	0	0	1	0	0
1425137_a_at	BC011215	H2-Q10	histocompatibility 2; Q region locus 10	1	1	1	1	1	1	0	0	1	7	6	0.5	0.666667	0.0050948									1	Homologene group 115651	2	0	0	0	0	0	0	0	0	1	0	0	0	0	0	0	1	0	0
1444350_at	BB227643	Slfn10	schlafen 10	1	1	1	1	1	1	0	0	1	7	2	0.428571	0	0.00519774								1	0	Homologene group 45432	2	0	0	1	0	0	0	0	0	1	0	0	0	0	0	0	1	0	0
1431449_at	AK014872	Slco6d1	solute carrier organic anion transporter family; member 6d1	1	1	1	1	1	1	0	0	1	7	9	0.310545	0.972222	0.00517791
1434183_at	BI415031	---	---	1	1	1	1	1	1	0	0	1	7	4	0.225768	0	0.00517766
1421901_at	BB077436	Eif2ak1	eukaryotic translation initiation factor 2 alpha kinase 1	1	1	1	1	1	1	0	0	1	7	6	0.155167	0.666667	0.00516099								1	1	Homologene group 8290	7	0	0	1	0	0	1	1	0	1	0	1	0	0	0	0	1	0	1
1432542_at	AK013405	2810474C18Rik	RIKEN cDNA 2810474C18 gene	1	1	1	1	1	1	0	0	1	7	4	0.1	0.666667	0.00520159
1419630_a_at	NM_053168	Trim11	tripartite motif protein 11	1	1	1	1	1	1	0	0	1	7	9	0.0386473	0.972222	0.00517753								1	1	Homologene group 14225	4	0	1	1	0	0	0	0	0	1	0	0	0	0	0	0	1	0	0
1431971_at	AK018689	---	---	1	1	1	1	1	1	0	0	1	7	5	0.0271902	0.9	0.00516663
1460603_at	BB145092	AA175286	EST AA175286	1	1	1	1	1	1	0	0	1	7	6	0.0140845	0.933333	0.00516114
1453259_at	BB667513	3830422K02Rik	RIKEN cDNA 3830422K02 gene	1	1	1	1	1	1	0	0	1	7	9	0	1	0.00519107
1430274_a_at	AK018331	Stard3nl	STARD3 N-terminal like	1	1	1	1	1	1	0	0	1	7	6	0	1	0.00519109								1	1	Homologene group 11501	6	0	1	1	0	0	0	0	0	1	0	1	0	0	0	0	1	0	1
1424396_a_at	AU040643	Asrgl1	asparaginase like 1	1	1	1	1	1	1	0	0	1	7	5	0	1	0.00520025								1	1	Homologene group 11825	9	0	1	1	1	0	0	1	0	1	0	1	0	1	0	0	1	0	1
1420752_at	NM_030714	Dtx3	deltex 3 homolog (Drosophila)	1	1	1	1	1	1	0	0	1	7	5	0	1	0.00516602								1	1	Homologene group 12754	4	0	0	1	0	0	0	0	0	1	0	1	0	0	0	0	1	0	0
1426906_at	M74124	Ifi203	interferon activated gene 203	1	1	1	1	1	1	0	0	1	7	5	0	1	0.00516624									0	Homologene group 86937	0	0	0	1	0	0	0	0	0	0	0	0	0	0	0	0	0	0	0
1431008_at	BG916808	0610037M15Rik	RIKEN cDNA 0610037M15 gene	1	1	1	1	1	1	0	0	1	7	4	0	1	0.0050948
1458151_at	AV253033	4833444G19Rik	RIKEN cDNA 4833444G19 gene	1	1	1	1	1	1	0	0	1	7	4	0	1	0.00519363
1437493_at	BG066117	5230400M03Rik	RIKEN cDNA 5230400M03 gene	1	1	1	1	1	1	0	0	1	7	4	0	1	0.00520247
1442579_at	BB306259	---	Adult male diencephalon cDNA; RIKEN full-length enriched library; clone:9330107B13 product:unclassifiable; full insert sequence	1	1	1	1	1	1	0	0	1	7	4	0	1	0.00520667
1456673_at	AW554761	AL022943	Expressed sequence AL022943	1	1	1	1	1	1	0	0	1	7	4	0	1	0.00519594
1440993_at	BB667477	AW111846	Expressed sequence AW111846	1	1	1	1	1	1	0	0	1	7	4	0	1	0.0051503
1435768_at	AV371758	Arid4b	AT rich interactive domain 4B (Rbp1 like)	1	1	1	1	1	1	0	0	1	7	4	0	1	0.00521774								1	1	Homologene group 12847	5	0	1	1	0	0	0	0	0	1	0	1	0	0	0	0	1	0	0
1438275_at	AA221216	C130046K22Rik	RIKEN cDNA C130046K22 gene	1	1	1	1	1	1	0	0	1	7	4	0	1	0.00520467
1417439_at	NM_054042	Cd248	CD248 antigen; endosialin	1	1	1	1	1	1	0	0	1	7	4	0	1	0.00520306								1	0	Homologene group 10699	3	0	1	1	0	0	0	0	0	1	0	0	0	0	0	0	1	0	0
1439594_at	BG087177	D130062J10Rik	RIKEN cDNA D130062J10 gene	1	1	1	1	1	1	0	0	1	7	4	0	1	0.000228571
1436517_at	BI416101	H1fx	H1 histone family; member X	1	1	1	1	1	1	0	0	1	7	4	0	1	0.00518832								1	1	Homologene group 4397	6	0	1	1	0	0	0	0	0	1	0	1	0	0	0	0	1	0	1
1417227_at	NM_023644	Mccc1	methylcrotonoyl-Coenzyme A carboxylase 1 (alpha)	1	1	1	1	1	1	0	0	1	7	4	0	1	0.00519913								1	1	Homologene group 10603	12	1	1	1	1	0	0	1	0	1	1	0	0	1	1	0	1	1	1
1445068_at	BM239348	Malt1	Mucosa associated lymphoid tissue lymphoma translocation gene 1	1	1	1	1	1	1	0	0	1	7	4	0	1	0.00519513								1	1	Homologene group 4938	6	0	1	1	0	0	0	0	0	1	0	1	0	0	0	0	1	0	1
1419709_at	NM_025288	Stfa3	stefin A3	1	1	1	1	1	1	0	0	1	7	4	0	1	0.00512061									0	Homologene group 115602	0	0	0	1	0	0	0	0	0	0	0	0	0	0	0	0	0	0	0
1417247_at	NM_133818	AI597479	expressed sequence AI597479	1	1	1	1	1	1	0	0	1	7	3	0	1	0.000228624								1	1	Homologene group 11459	6	0	1	1	0	0	0	0	0	1	0	1	0	0	0	0	1	0	1
1454989_at	AW553463	BC055915	cDNA sequence BC055915	1	1	1	1	1	1	0	0	1	7	3	0	1	0.00517334
1425201_a_at	BC024619	6430559E15Rik	RIKEN cDNA 6430559E15 gene	1	1	1	1	1	1	0	0	1	7	3	0	1	0.00519498
1441757_at	AI120476	1190002F15Rik	RIKEN cDNA 1190002F15 gene	1	1	1	1	1	1	0	0	1	7	2	0	NA	0.00518408
1428894_at	AK005048	1300018J18Rik	RIKEN cDNA 1300018J18 gene	1	1	1	1	1	1	0	0	1	7	2	0	NA	0.000228467								1	0	Homologene group 69439	7	0	1	1	0	0	0	1	0	1	0	1	0	1	0	0	0	1	1
1429675_at	AK006257	1700023A16Rik	RIKEN cDNA 1700023A16 gene	1	1	1	1	1	1	0	0	1	7	2	0	NA	0.00515795								1	1	Homologene group 106211	3	0	1	0	0	0	0	0	0	1	0	0	0	0	0	0	1	0	0
1417807_at	NM_027356	2700038N03Rik	RIKEN cDNA 2700038N03 gene	1	1	1	1	1	1	0	0	1	7	2	0	NA	0.00519724
1430800_at	AK015825	4930518F22Rik	RIKEN cDNA 4930518F22 gene	1	1	1	1	1	1	0	0	1	7	2	0	NA	0.00515187
1453952_at	AK016278	4930572G02Rik	RIKEN cDNA 4930572G02 gene	1	1	1	1	1	1	0	0	1	7	2	0	NA	0.0051789
1430023_at	AK017218	5133400G04Rik	RIKEN cDNA 5133400G04 gene	1	1	1	1	1	1	0	0	1	7	2	0	NA	0.00520633								1	1	Homologene group 32688	3	0	1	0	0	0	0	0	0	1	0	0	0	0	0	0	1	0	0
1434084_at	BF142017	5730601F06Rik	RIKEN cDNA 5730601F06 gene	1	1	1	1	1	1	0	0	1	7	2	0	NA	0.00516695									0	Homologene group 106019	0	0	0	1	0	0	0	0	0	0	0	0	0	0	0	0	0	0	0
1432588_at	BB032042	---	---	1	1	1	1	1	1	0	0	1	7	2	0	NA	0.0051793
1431194_at	AK020081	6030468B19Rik	RIKEN cDNA 6030468B19 gene	1	1	1	1	1	1	0	0	1	7	2	0	NA	0.00519787								1	0	Homologene group 90660	0	0	0	0	0	0	0	0	0	0	0	0	0	0	0	0	1	0	0
1454458_at	AK018099	---	---	1	1	1	1	1	1	0	0	1	7	2	0	NA	0.0052085
1440922_at	AI506672	9130208D14Rik	RIKEN cDNA 9130208D14 gene	1	1	1	1	1	1	0	0	1	7	2	0	NA	0.000228467									1	Homologene group 32708	3	0	0	1	0	0	0	0	0	0	0	0	0	0	0	0	1	0	1
1417000_at	NM_030251	Abtb1	ankyrin repeat and BTB (POZ) domain containing 1	1	1	1	1	1	1	0	0	1	7	2	0	NA	0.00519258								1	1	Homologene group 32731	12	0	1	1	0	1	1	0	0	1	1	1	0	1	1	1	0	1	1
1417561_at	NM_007469	Apoc1	apolipoprotein C-I	1	1	1	1	1	1	0	0	1	7	2	0	NA	0.00516735								1	0	Homologene group 1244	3	0	1	1	0	0	0	0	0	1	0	0	0	0	0	0	1	0	0
1419549_at	NM_007482	Arg1	arginase 1; liver	1	1	1	1	1	1	0	0	1	7	2	0	NA	0.000228467								1	1	Homologene group 29	10	0	1	1	0	1	1	0	0	1	1	1	1	0	1	1	0	0	0
1423526_at	BM247863	Arid3b	AT rich interactive domain 3B (Bright like)	1	1	1	1	1	1	0	0	1	7	2	0	NA	0.000228571								1	1	Homologene group 4721	5	0	1	1	0	0	0	0	0	1	0	1	0	0	0	0	1	0	0
1436845_at	BB398993	Axin2	axin2	1	1	1	1	1	1	0	0	1	7	2	0	NA	0.00518992								1	1	Homologene group 3420	6	0	1	1	0	0	0	0	0	1	0	1	0	0	0	0	1	0	1
1446443_at	BB307279	B230213L16Rik	RIKEN cDNA B230213L16 gene	1	1	1	1	1	1	0	0	1	7	2	0	NA	0.00516947
1416608_a_at	NM_030561	BC004004	cDNA sequence BC004004	1	1	1	1	1	1	0	0	1	7	2	0	NA	0.000228467								1	1	Homologene group 12728	6	0	1	1	0	0	0	0	0	1	0	1	0	0	0	0	1	0	1
1438784_at	BB329234	---	---	1	1	1	1	1	1	0	0	1	7	2	0	NA	0.00521158
1416250_at	NM_007570	Btg2	B-cell translocation gene 2; anti-proliferative	1	1	1	1	1	1	0	0	1	7	2	0	NA	0.000228467								1	1	Homologene group 31406	6	0	1	1	0	0	0	0	0	1	0	1	0	0	0	0	1	0	1
1434021_at	BG064982	C230096C10Rik	RIKEN cDNA C230096C10 gene	1	1	1	1	1	1	0	0	1	7	2	0	NA	0.000228467									1	Homologene group 9002	11	1	1	1	1	0	0	1	0	1	0	1	0	1	0	0	1	1	1
1441394_at	BG065701	Upf2	UPF2 regulator of nonsense transcripts homolog (yeast)	1	1	1	1	1	1	0	0	1	7	2	0	NA	0.000228571								1	1	Homologene group 6101	15	0	1	1	1	1	1	1	0	1	1	1	0	1	1	1	1	1	1
1460139_at	BG066463	Mbnl1	Muscleblind-like 1 (Drosophila)	1	1	1	1	1	1	0	0	1	7	2	0	NA	0.00521634								1	0	Homologene group 23186	7	0	1	1	1	0	0	1	0	1	0	1	0	0	0	0	1	0	1
1456972_at	BG066759	D430042O09Rik	RIKEN cDNA D430042O09 gene	1	1	1	1	1	1	0	0	1	7	2	0	NA	0.000228467								1	1	Homologene group 45841	7	1	1	1	0	0	0	0	0	1	0	1	0	0	0	0	1	0	1
1447197_at	C86544	---	---	1	1	1	1	1	1	0	0	1	7	2	0	NA	0.00515517
1445089_at	BG069671	---	---	1	1	1	1	1	1	0	0	1	7	2	0	NA	0.00517205
1459118_at	BB471224	D230038C21	hypothetical protein D230038C21	1	1	1	1	1	1	0	0	1	7	2	0	NA	0.00516782
1424625_a_at	BC023016	6030446I19Rik	RIKEN cDNA 6030446I19 gene	1	1	1	1	1	1	0	0	1	7	2	0	NA	0.00515867
1445104_at	BB366803	E230029C05Rik	RIKEN cDNA E230029C05 gene	1	1	1	1	1	1	0	0	1	7	2	0	NA	0.00521514
1453416_at	BE199211	Gas2l3	growth arrest-specific 2 like 3	1	1	1	1	1	1	0	0	1	7	2	0	NA	0.000228467								1	1	Homologene group 18386	5	0	0	1	0	0	0	0	0	1	0	1	0	0	0	0	1	0	1
1437425_at	BB419318	Gdap1	ganglioside-induced differentiation-associated-protein 1	1	1	1	1	1	1	0	0	1	7	2	0	NA	0.00518435								1	1	Homologene group 40713	10	0	1	1	1	0	0	1	0	1	0	1	0	1	0	0	1	1	1
1449671_at	AW546472	---	---	1	1	1	1	1	1	0	0	1	7	2	0	NA	0.000228467
1460308_a_at	NM_026729	Ict1	immature colon carcinoma transcript 1	1	1	1	1	1	1	0	0	1	7	2	0	NA	0.00519571								1	1	Homologene group 1185	10	1	0	1	1	0	0	1	0	1	0	1	0	1	0	0	1	1	1
1427164_at	BB730912	Il13ra1	interleukin 13 receptor; alpha 1	1	1	1	1	1	1	0	0	1	7	2	0	NA	0.00516389								1	0	Homologene group 1198	4	0	1	1	0	0	0	0	0	1	0	0	0	0	0	0	1	0	1
1420462_at	NM_030688	Il1rapl2	interleukin 1 receptor accessory protein-like 2	1	1	1	1	1	1	0	0	1	7	2	0	NA	0.00519823								1	1	Homologene group 9681	4	0	1	1	0	0	0	0	0	1	0	0	0	0	0	0	0	0	1
1454755_at	AV375361	Itpkc	inositol 1;4;5-trisphosphate 3-kinase C	1	1	1	1	1	1	0	0	1	7	2	0	NA	0.00511966								1	1	Homologene group 11868	5	0	1	1	0	0	0	0	0	1	0	1	0	0	0	0	1	0	0
1433894_at	BB755745	AI591476	expressed sequence AI591476	1	1	1	1	1	1	0	0	1	7	2	0	NA	0.000228467
1445150_at	BB376789	---	---	1	1	1	1	1	1	0	0	1	7	2	0	NA	0.00518372
1458164_at	BB128089	---	16 days neonate cerebellum cDNA; RIKEN full-length enriched library; clone:9630027L18 product:unknown EST; full insert sequence	1	1	1	1	1	1	0	0	1	7	2	0	NA	0.00513225
1421650_at	NM_053172	Mepe	matrix extracellular phosphoglycoprotein with ASARM motif (bone)	1	1	1	1	1	1	0	0	1	7	2	0	NA	0.00518776								1	1	Homologene group 10623	4	0	1	1	0	0	0	0	0	1	0	0	0	0	0	0	1	0	0
1420870_at	BB353133	Mllt10	myeloid/lymphoid or mixed lineage-leukemia translocation to 10 homolog (Drosophila)	1	1	1	1	1	1	0	0	1	7	2	0	1	0.00521804								1	1	Homologene group 20973	5	0	1	1	0	0	0	0	0	1	0	1	0	0	0	0	0	0	1
1441055_at	BB431157	R75368	Expressed sequence R75368	1	1	1	1	1	1	0	0	1	7	2	0	1	0.00520067
1448874_a_at	NM_011363	Sh2bpsm1	SH2-B PH domain containing signaling mediator 1	1	1	1	1	1	1	0	0	1	7	2	0	1	0.00520211
1454622_at	BG066984	Slc38a5	solute carrier family 38; member 5	1	1	1	1	1	1	0	0	1	7	2	0	1	0.00519472								1	1	Homologene group 24917	4	0	0	1	0	0	0	0	0	1	0	1	0	0	0	0	1	0	0
1431128_at	AI593513	9030409E16Rik	RIKEN cDNA 9030409E16 gene	1	1	1	1	1	1	0	0	1	7	2	0	1	0.0051859
1416156_at	NM_009502	---	---	1	1	1	1	1	1	0	0	1	7	2	0	1	0.00515948
1454234_at	AK007170	1700111I05Rik	RIKEN cDNA 1700111I05 gene	1	1	1	1	1	1	0	0	1	7	2	0	1	0.00517018
1452612_at	BM231649	Zfp294	zinc finger protein 294	1	1	1	1	1	1	0	0	1	7	2	0	1	0.00521219								1
1418222_at	NM_019836	2610024G14Rik	RIKEN cDNA 2610024G14 gene	1	1	1	1	1	1	0	0	1	7	1	0	NA	0.000228467								1	1	Homologene group 10518	7	0	1	1	0	0	0	0	0	1	0	0	0	1	0	0	1	1	1
1454029_at	AK015267	4930431F12Rik	RIKEN cDNA 4930431F12 gene	1	1	1	1	1	1	0	0	1	7	1	0	NA	0.000228467
1456896_at	BB053380	6720462K09Rik	RIKEN cDNA 6720462K09 gene	1	1	1	1	1	1	0	0	1	7	1	0	NA	0.000228467
1418458_at	NM_019805	Anapc7	anaphase promoting complex subunit 7	1	1	1	1	1	1	0	0	1	7	1	0	NA	0.000228467								1	1	Homologene group 10512	10	0	1	1	1	0	0	1	0	1	0	1	0	1	0	0	1	1	1
1451836_at	BC022651	BC022651	cDNA sequence BC022651	1	1	1	1	1	1	0	0	1	7	1	0	NA	0.0051888								1	1	Homologene group 19603	5	0	1	1	0	0	0	0	0	1	0	1	0	0	0	0	1	0	0
1451635_at	AB056443	D630002G06 /// C730048C13Rik	hypothetical protein D630002G06 /// RIKEN cDNA C730048C13 gene	1	1	1	1	1	1	0	0	1	7	1	0	NA	0.000228467
1428485_at	AK009873	Car12	carbonic anyhydrase 12	1	1	1	1	1	1	0	0	1	7	1	0	NA	0.000228467								1	1	Homologene group 20327	5	0	1	1	0	0	0	0	0	1	0	0	0	0	0	0	1	0	1
1434565_at	AV305616	Cgrrf1	cell growth regulator with ring finger domain 1	1	1	1	1	1	1	0	0	1	7	1	0	NA	0.00518543								1	1	Homologene group 4789	6	0	1	1	0	0	0	0	0	1	0	1	0	0	0	0	1	0	1
1426902_at	BC024135	Coq6	coenzyme Q6 homolog (yeast)	1	1	1	1	1	1	0	0	1	7	1	0	NA	0.0052043								1	1	Homologene group 6039	17	1	1	1	1	1	1	1	0	1	1	1	1	1	1	1	1	1	1
1456428_at	AV022238	---	Transcribed locus	1	1	1	1	1	1	0	0	1	7	1	0	NA	0.000228467
1427723_at	AF092734	Gdf11	growth differentiation factor 11	1	1	1	1	1	1	0	0	1	7	1	0	NA	0.00520571								1	0	Homologene group 21183	4	1	0	1	0	0	0	0	0	1	0	1	0	0	0	0	1	0	0
1444302_at	AV278332	BC049816	cDNA sequence BC049816	1	1	1	1	1	1	0	0	1	7	1	0	NA	0.00516217
1439121_at	AW822416	H2-T10 /// H2-T17 /// H2-T22 /// H2-T9	histocompatibility 2; T region locus 10 /// histocompatibility 2; T region locus 17 /// histocompatibility 2; T region locus 22 /// histocompatibility 2; T region locus 9	1	1	1	1	1	1	0	0	1	7	1	0	NA	0.00514831
1438037_at	AW208668	Herc5	hect domain and RLD 5	1	1	1	1	1	1	0	0	1	7	1	0	NA	0.00520081									1	Homologene group 70768	4	0	1	1	0	0	0	0	0	1	0	0	0	0	0	0	1	0	0
1416176_at	BF166000	Hmgb1	high mobility group box 1	1	1	1	1	1	1	0	0	1	7	1	0	NA	0.00514516								1	1	Homologene group 87355	3	0	0	1	0	0	0	0	0	1	0	0	0	0	0	0	1	0	0
1425895_a_at	U43884	Idb1	inhibitor of DNA binding 1	1	1	1	1	1	1	0	0	1	7	1	0	NA	0.0051976
1423104_at	BB345784	Irs1	insulin receptor substrate 1	1	1	1	1	1	1	0	0	1	7	1	0	NA	0.00520571								1	1	Homologene group 4049	6	0	1	1	0	0	0	0	0	1	0	1	0	0	0	0	1	0	1
1454729_at	BB293313	B130017P16Rik	RIKEN cDNA B130017P16 gene	1	1	1	1	1	1	0	0	1	7	1	0	NA	0.0051521
1437178_at	BM228804	Gm149	gene model 149; (NCBI)	1	1	1	1	1	1	0	0	1	7	1	0	NA	0.00519584
1418990_at	NM_025658	Ms4a4d	membrane-spanning 4-domains; subfamily A; member 4D	1	1	1	1	1	1	0	0	1	7	1	0	NA	0.0051034									0	Homologene group 113790	0	0	0	1	0	0	0	0	0	0	0	0	0	0	0	0	0	0	0
1421333_a_at	AK019238	Mynn	myoneurin	1	1	1	1	1	1	0	0	1	7	1	0	NA	0.00518109								1	1	Homologene group 10253	6	0	1	1	0	0	0	0	0	1	0	1	0	0	0	0	1	0	1
1436188_a_at	AI837704	---	---	1	1	1	1	1	1	0	0	1	7	1	0	NA	0.00519783
1447705_at	BB410237	4833432M17Rik	RIKEN cDNA 4833432M17 gene	1	1	1	1	1	1	0	0	1	7	1	0	NA	0.000228571
1450765_a_at	NM_023898	Pde6h	phosphodiesterase 6H; cGMP-specific; cone; gamma	1	1	1	1	1	1	0	0	1	7	1	0	NA	0.000228467								1	1	Homologene group 4522	6	0	1	1	0	0	0	0	0	1	0	1	0	0	0	0	1	0	1
1428228_at	AK013402	Pgm3	phosphoglucomutase 3	1	1	1	1	1	1	0	0	1	7	1	0	NA	0.00521264								1	1	Homologene group 9205	17	1	1	1	1	1	1	1	0	1	1	1	1	1	1	1	1	1	1
1450533_a_at	NM_009538	Plagl1	pleiomorphic adenoma gene-like 1	1	1	1	1	1	1	0	0	1	7	1	0	NA	0.00519719								1
1424902_at	AF378760	Plxdc1	plexin domain containing 1	1	1	1	1	1	1	0	0	1	7	1	0	NA	0.000228467								1	1	Homologene group 10700	5	0	1	1	0	0	0	0	0	1	0	0	0	0	0	0	1	0	1
1420737_at	NM_019938	Pmfbp1	polyamine modulated factor 1 binding protein 1	1	1	1	1	1	1	0	0	1	7	1	0	NA	0.00513481								1	1	Homologene group 23182	4	0	1	1	0	0	0	0	0	1	0	0	0	0	0	0	1	0	0
1449028_at	AF378088	Rhou	ras homolog gene family; member U	1	1	1	1	1	1	0	0	1	7	1	0	NA	0.00520038								1	1	Homologene group 49663	4	0	1	0	0	0	0	0	0	1	0	1	0	0	0	0	0	0	1
1451293_at	BC014703	Rnu3ip2	RNA; U3 small nucleolar interacting protein 2	1	1	1	1	1	1	0	0	1	7	1	0	NA	0.00519099
1448328_at	BC010198	Sh3bp2	SH3-domain binding protein 2	1	1	1	1	1	1	0	0	1	7	1	0	NA	0.000228467								1	0	Homologene group 2276	5	0	1	1	0	0	0	0	0	1	0	1	0	0	0	0	1	0	1
1425086_a_at	AF248636	Slamf6	SLAM family member 6	1	1	1	1	1	1	0	0	1	7	1	0	NA	0.000228467								1	1	Homologene group 49945	3	0	0	1	0	0	0	0	0	1	0	0	0	0	0	0	1	0	0
1420361_at	NM_013612	Slc11a1	solute carrier family 11 (proton-coupled divalent metal ion transporters); member 1	1	1	1	1	1	1	0	0	1	7	1	0	NA	0.00516443								1	1	Homologene group 73884	7	0	1	1	0	0	0	0	0	1	0	0	0	1	0	0	1	1	1
1424905_a_at	BC019647	Slc39a11	solute carrier family 39 (metal ion transporter); member 11	1	1	1	1	1	1	0	0	1	7	1	0	NA	0.00516141								1	1	Homologene group 12331	9	1	1	1	1	0	0	1	0	1	0	1	0	0	0	0	1	0	1
1453875_at	AK008024	2010001P20Rik	RIKEN cDNA 2010001P20 gene	1	1	1	1	1	1	0	0	1	7	1	0	NA	0.00517208
1452516_at	AJ245454	Smok2	sperm motility kinase 2	1	1	1	1	1	1	0	0	1	7	1	0	NA	0.00517492
1452069_a_at	BM210680	---	---	1	1	1	1	1	1	0	0	1	7	1	0	NA	0.00520582
1419170_at	BB667295	2310044D20Rik	RIKEN cDNA 2310044D20 gene	1	1	1	1	1	1	0	0	1	7	1	0	NA	0.00517655
1425308_at	BC026666	Trim31	tripartite motif-containing 31	1	1	1	1	1	1	0	0	1	7	1	0	NA	0.00521428								1	1	Homologene group 17137	3	0	0	1	0	0	0	0	0	1	0	0	0	0	0	0	1	0	0
1448361_at	BB833716	Ttc3	tetratricopeptide repeat domain 3	1	1	1	1	1	1	0	0	1	7	1	0	NA	0.00521488								1	1	Homologene group 2487	5	0	1	1	0	0	0	0	0	1	0	0	0	0	0	0	1	0	1
1416256_a_at	NM_011655	Tubb5	tubulin; beta 5	1	1	1	1	1	1	0	0	1	7	1	0	NA	0.00519997								1	1	Homologene group 69099	9	1	1	1	0	0	0	0	1	1	0	1	0	1	0	0	1	1	0
1421750_a_at	NM_011692	Vbp1	von Hippel-Lindau binding protein 1	1	1	1	1	1	1	0	0	1	7	1	0	NA	0.00518483								1	1	Homologene group 2531	16	1	1	0	1	1	1	1	0	1	1	1	1	1	1	1	1	1	1
1418176_at	AV290079	Vdr	vitamin D receptor	1	1	1	1	1	1	0	0	1	7	1	0	NA	0.00520425								1	1	Homologene group 37297	7	0	1	1	1	0	0	1	0	1	0	1	0	0	0	0	0	0	1
1439320_at	BB398014	BC030477	cDNA sequence BC030477	1	1	1	1	1	1	0	0	1	7	1	0	NA	0.00510513
1425293_a_at	BC017627	1500031H04Rik	RIKEN cDNA 1500031H04 gene	1	1	1	1	1	1	0	0	1	7	1	0	NA	0.00515894
1456507_at	BG923959	Zfp454	zinc finger protein 454	1	1	1	1	1	1	0	0	1	7	1	0	NA	0.00519056								1	1	Homologene group 72226	2	0	0	0	0	0	0	0	0	1	0	0	0	0	0	0	1	0	0
1421539_at	NM_009576	Zic4	zinc finger protein of the cerebellum 4	1	1	1	1	1	1	0	0	1	7	1	0	NA	0.000228467								1	1	Homologene group 32075	5	0	1	1	0	0	0	0	0	1	0	0	0	0	0	0	1	0	1
1434088_at	BM119467	Zfp496	zinc finger protein 496	1	1	1	1	1	1	0	0	1	7	1	0	NA	0.00519921
1423862_at	BE986504	Plekhf2	pleckstrin homology domain containing; family F (with FYVE domain) member 2	1	1	0	1	1	1	0	1	1	7												1	1	Homologene group 11620	8	1	0	1	1	0	0	1	0	1	0	1	0	0	0	0	1	0	1
1423809_at	BC004617	Tcf19	transcription factor 19	1	1	0	1	1	1	0	1	1	7												1	1	Homologene group 5156	4	0	1	1	0	0	0	0	0	1	0	1	0	0	0	0	0	0	0
1460255_at	NM_033622	Tnfsf13b	tumor necrosis factor (ligand) superfamily; member 13b	1	1	0	1	1	1	0	1	1	7												1	1	Homologene group 48443	6	0	1	1	0	0	0	0	0	1	0	1	0	0	0	0	1	0	1
1451747_a_at	AK016474	Apg12l	autophagy 12-like (S. cerevisiae)	1	0	1	1	1	1	0	1	1	7
1424292_at	BC005799	Depdc1a	DEP domain containing 1a	1	0	1	1	1	1	0	1	1	7												1	0	Homologene group 9834	5	0	1	1	0	0	0	0	0	1	0	1	0	0	0	0	1	0	1
1453064_at	AK018594	5730466H23Rik	RIKEN cDNA 5730466H23 gene	1	0	1	1	1	1	0	1	1	7
1423335_at	AW545354	1110004F10Rik	RIKEN cDNA 1110004F10 gene	1	1	1	1	1	1	0	0	1	7												1	1	Homologene group 8606	6	0	1	1	0	0	0	0	0	1	0	1	0	0	0	0	1	0	1
1429468_at	AK003775	1110018F16Rik	RIKEN cDNA 1110018F16 gene	1	1	1	1	1	1	0	0	1	7
1428628_at	AK004439	1190002A17Rik	RIKEN cDNA 1190002A17 gene	1	1	1	1	1	1	0	0	1	7												1	1	Homologene group 17622	8	0	1	1	0	0	0	0	0	1	0	1	0	1	0	0	1	1	1
1429286_at	AK004474	1190003M12Rik	RIKEN cDNA 1190003M12 gene	1	1	1	1	1	1	0	0	1	7												1	1	Homologene group 87422	3	0	0	1	0	0	0	0	0	1	0	0	0	0	0	0	1	0	0
1453075_at	AK005436	1600012P17Rik	RIKEN cDNA 1600012P17 gene	1	1	1	1	1	1	0	0	1	7
1440775_at	AV046380	1700054K19Rik	RIKEN cDNA 1700054K19 gene	1	1	1	1	1	1	0	0	1	7
1430027_at	BQ126961	1810028F09Rik	RIKEN cDNA 1810028F09 gene	1	1	1	1	1	1	0	0	1	7
1442945_at	BG072448	2010109K09Rik	RIKEN cDNA 2010109K09 gene	1	1	1	1	1	1	0	0	1	7
1430964_at	AK009622	2310034O05Rik	RIKEN cDNA 2310034O05 gene	1	1	1	1	1	1	0	0	1	7
1424038_a_at	BC020179	2310044H10Rik	RIKEN cDNA 2310044H10 gene	1	1	1	1	1	1	0	0	1	7												1	1	Homologene group 18036	5	0	1	1	0	0	0	0	0	1	0	1	0	0	0	0	1	0	0
1435377_at	BB035728	2410002O22Rik	RIKEN cDNA 2410002O22 gene	1	1	1	1	1	1	0	0	1	7												1	1	Homologene group 11792	10	1	1	1	1	0	0	1	0	1	0	1	0	1	0	0	1	0	1
1452607_at	BB410125	2610030H06Rik	RIKEN cDNA 2610030H06 gene	1	1	1	1	1	1	0	0	1	7
1449553_at	AK009389	2610200G18Rik	RIKEN cDNA 2610200G18 gene	1	1	1	1	1	1	0	0	1	7
1428452_at	AK012812	2810025M15Rik	RIKEN cDNA 2810025M15 gene	1	1	1	1	1	1	0	0	1	7
1452268_at	AV337692	2810485I05Rik	RIKEN cDNA 2810485I05 gene	1	1	1	1	1	1	0	0	1	7												1
1431595_at	AK013746	2900064B16Rik	RIKEN cDNA 2900064B16 gene	1	1	1	1	1	1	0	0	1	7
1436035_at	AV225683	3830431G21Rik	RIKEN cDNA 3830431G21 gene	1	1	1	1	1	1	0	0	1	7												1	0	Homologene group 15090	4	1	0	1	0	0	0	0	0	1	0	0	0	0	0	0	1	0	1
1454353_at	AK014733	---	---	1	1	1	1	1	1	0	0	1	7
1438987_at	AV044525	4921509E07Rik	RIKEN cDNA 4921509E07 gene	1	1	1	1	1	1	0	0	1	7												1
1432120_at	AK014877	4921513D11Rik	RIKEN cDNA 4921513D11 gene	1	1	1	1	1	1	0	0	1	7
1433244_at	AK016289	---	---	1	1	1	1	1	1	0	0	1	7
1436563_at	AV277283	4932441J04Rik	RIKEN cDNA 4932441J04 gene	1	1	1	1	1	1	0	0	1	7
1432009_at	AK016816	4933415D12Rik	RIKEN cDNA 4933415D12 gene	1	1	1	1	1	1	0	0	1	7
1421422_at	NM_138654	AF397014	cDNA sequence AF397014	1	1	1	1	1	1	0	0	1	7
1453395_at	BB022670	5330403D14Rik	RIKEN cDNA 5330403D14 gene	1	1	1	1	1	1	0	0	1	7
1453150_at	BG069341	5830406J20Rik	RIKEN cDNA 5830406J20 gene	1	1	1	1	1	1	0	0	1	7
1429896_at	BE135996	5830408B19Rik	RIKEN cDNA 5830408B19 gene	1	1	1	1	1	1	0	0	1	7
1454429_at	AK018030	---	---	1	1	1	1	1	1	0	0	1	7
1439971_at	AV328193	6330439K17Rik	RIKEN cDNA 6330439K17 gene	1	1	1	1	1	1	0	0	1	7												1	0	Homologene group 10037	4	0	1	0	0	0	0	0	0	1	0	1	0	0	0	0	1	0	1
1430687_at	AV333178	6330545A04Rik	RIKEN cDNA 6330545A04 gene	1	1	1	1	1	1	0	0	1	7												1	1	Homologene group 12793	5	0	1	1	0	0	0	0	0	1	0	1	0	0	0	0	1	0	0
1457694_at	AV343405	6430537H07Rik	RIKEN cDNA 6430537H07 gene	1	1	1	1	1	1	0	0	1	7												1	0	Homologene group 18691	5	0	1	1	0	0	0	0	0	1	0	1	0	0	0	0	1	0	1
1440584_at	AV377077	9130221L21Rik	RIKEN cDNA 9130221L21 gene	1	1	1	1	1	1	0	0	1	7
1432531_at	AK020314	9230104L09Rik	RIKEN cDNA 9230104L09 gene	1	1	1	1	1	1	0	0	1	7													0	Homologene group 87070	0	0	0	1	0	0	0	0	0	0	0	0	0	0	0	0	0	0	0
1432867_at	BB174628	---	---	1	1	1	1	1	1	0	0	1	7
1429231_at	AK015078	---	---	1	1	1	1	1	1	0	0	1	7
1454331_at	BB104606	9430092D12Rik	RIKEN cDNA 9430092D12 gene	1	1	1	1	1	1	0	0	1	7
1440430_at	BB152199	A130004G07Rik	RIKEN cDNA A130004G07 gene	1	1	1	1	1	1	0	0	1	7
1441509_at	BB152912	A130009I22Rik	RIKEN cDNA A130009I22 gene	1	1	1	1	1	1	0	0	1	7
1444343_at	BB475564	E030024I16Rik	RIKEN cDNA E030024I16 gene	1	1	1	1	1	1	0	0	1	7
1435596_at	BB820613	A530088I07Rik	RIKEN cDNA A530088I07 gene	1	1	1	1	1	1	0	0	1	7
1455370_at	AI451630	A630023P12Rik	RIKEN cDNA A630023P12 gene	1	1	1	1	1	1	0	0	1	7
1446519_at	BB259739	A730091E23Rik	RIKEN cDNA A730091E23 gene	1	1	1	1	1	1	0	0	1	7
1419831_at	AA416453	---	---	1	1	1	1	1	1	0	0	1	7
1459100_at	BG070231	---	---	1	1	1	1	1	1	0	0	1	7
1439000_at	AV282564	LOC328845	similar to hypothetical protein	1	1	1	1	1	1	0	0	1	7
1428386_at	AK012088	Acsl3	UTP14; U3 small nucleolar ribonucleoprotein; homolog B (yeast)	1	1	1	1	1	1	0	0	1	7												1	0	Homologene group 3278	9	0	1	1	1	0	0	1	0	1	0	1	0	1	0	0	1	1	1
1450110_at	NM_009626	Adh7	alcohol dehydrogenase 7 (class IV); mu or sigma polypeptide	1	1	1	1	1	1	0	0	1	7												1	0	Homologene group 37333	2	0	0	1	0	0	0	0	0	1	0	0	0	0	0	0	1	0	0
1457541_at	BB019018	LOC434756	similar to Testis-specific A-kinase-anchoring-protein	1	1	1	1	1	1	0	0	1	7
1446396_at	BB554891	Angptl1	Angiopoietin-like 1	1	1	1	1	1	1	0	0	1	7												1	1	Homologene group 83224	6	0	1	1	0	0	0	0	0	1	0	1	0	0	0	0	1	0	1
1417082_at	NM_130889	Anp32b	acidic nuclear phosphoprotein 32 family; member B	1	1	1	1	1	1	0	0	1	7												1	1	Homologene group 21286	7	0	1	1	0	0	0	0	0	1	0	1	0	1	0	0	1	1	0
1416374_at	AF242857	Ap3m1	adaptor-related protein complex 3; mu 1 subunit	1	1	1	1	1	1	0	0	1	7												1	1	Homologene group 22693	8	1	1	1	0	0	1	0	0	1	0	1	0	0	0	0	1	0	1
1417889_at	NM_009694	Apobec2	apolipoprotein B editing complex 2	1	1	1	1	1	1	0	0	1	7												1	1	Homologene group 4941	5	0	1	1	0	0	0	0	0	1	0	1	0	0	0	0	0	0	1
1416735_at	NM_019734	Asah1	N-acylsphingosine amidohydrolase 1	1	1	1	1	1	1	0	0	1	7												1	1	Homologene group 10504	7	1	1	1	0	0	0	0	0	1	0	1	0	0	0	0	1	0	1
1420346_at	NM_080858	Asb12	ankyrin repeat and SOCS box-containing protein 12	1	1	1	1	1	1	0	0	1	7												1	1	Homologene group 15446	6	0	1	1	0	0	0	0	0	1	0	1	0	0	0	0	1	0	1
1435784_at	AU019532	Apg9l1	APG9 autophagy 9-like 1 (S. cerevisiae)	1	1	1	1	1	1	0	0	1	7
1452811_at	BB393498	Atic	5-aminoimidazole-4-carboxamide ribonucleotide formyltransferase/IMP cyclohydrolase	1	1	1	1	1	1	0	0	1	7												1	1	Homologene group 2983	17	1	1	1	1	1	1	1	0	1	1	1	1	1	1	1	1	1	1
1431822_a_at	AK004992	Azi2	5-azacytidine induced gene 2	1	1	1	1	1	1	0	0	1	7												1	1	Homologene group 8443	6	0	1	1	0	0	0	0	0	1	0	1	0	0	0	0	1	0	1
1446206_at	BB306696	B230209C24Rik	RIKEN cDNA B230209C24 gene	1	1	1	1	1	1	0	0	1	7
1453695_at	AK016782	---	---	1	1	1	1	1	1	0	0	1	7
1448941_at	AW125856	B4galt2	UDP-Gal:betaGlcNAc beta 1;4- galactosyltransferase; polypeptide 2	1	1	1	1	1	1	0	0	1	7												1	0	Homologene group 2804	4	0	1	1	0	0	0	0	0	1	0	1	0	0	0	0	0	0	1
1457791_at	BB333194	B830008H07Rik	RIKEN cDNA B830008H07 gene	1	1	1	1	1	1	0	0	1	7
1445714_at	BB343145	B930042K01Rik	RIKEN cDNA B930042K01 gene	1	1	1	1	1	1	0	0	1	7
1443094_at	BB031311	BB031773	expressed sequence BB031773	1	1	1	1	1	1	0	0	1	7
1456235_at	BB198406	---	Transcribed locus	1	1	1	1	1	1	0	0	1	7
1423919_at	BC027393	BC023882	cDNA sequence BC023882	1	1	1	1	1	1	0	0	1	7												1	1	Homologene group 75209	6	0	0	1	0	0	0	0	0	1	0	1	0	1	0	0	0	1	1
1454885_at	BM211194	---	Similar to Zinc finger protein 267 (Zinc finger protein HZF2)	1	1	1	1	1	1	0	0	1	7
1423753_at	AF153440	Bambi	BMP and activin membrane-bound inhibitor; homolog (Xenopus laevis)	1	1	1	1	1	1	0	0	1	7												1	1	Homologene group 8215	6	0	1	1	0	0	0	0	0	1	0	1	0	0	0	0	1	0	1
1418133_at	NM_033601	Bcl3	B-cell leukemia/lymphoma 3	1	1	1	1	1	1	0	0	1	7												1	1	Homologene group 81738	4	0	1	1	0	0	0	0	0	1	0	1	0	0	0	0	0	0	0
1459923_at	AA185889	LOC328660	similar to RIKEN cDNA 2410004M13 gene; similar to p75NTR-associated cell death executor (Nerve growth factor receptor associated protein 1)	1	1	1	1	1	1	0	0	1	7
1416405_at	BC019502	Bgn	biglycan	1	1	1	1	1	1	0	0	1	7												1	1	Homologene group 1293	5	0	1	1	0	0	0	0	0	1	0	1	0	0	0	0	1	0	0
1427434_at	AI451585	---	---	1	1	1	1	1	1	0	0	1	7
1422767_at	BG079188	Bysl	bystin-like	1	1	1	1	1	1	0	0	1	7												1	1	Homologene group 2991	16	1	1	0	1	1	1	1	0	1	1	1	1	1	1	1	1	1	1
1423456_at	BM932775	Bzw2	basic leucine zipper and W2 domains 2	1	1	1	1	1	1	0	0	1	7												1	1	Homologene group 8530	8	0	1	1	0	0	0	0	0	1	0	1	0	1	0	0	1	1	1
1432547_at	AK021047	C030005H24Rik	RIKEN cDNA C030005H24 gene	1	1	1	1	1	1	0	0	1	7
1435610_at	BB282772	C130034I18Rik	RIKEN cDNA C130034I18 gene	1	1	1	1	1	1	0	0	1	7
1442033_at	AV376830	9130217G22Rik	RIKEN cDNA 9130217G22 gene	1	1	1	1	1	1	0	0	1	7
1451202_at	BC021479	C330007P06Rik	RIKEN cDNA C330007P06 gene	1	1	1	1	1	1	0	0	1	7												1	0	Homologene group 11133	8	1	1	1	1	0	0	1	0	1	0	1	0	0	0	0	1	0	1
1447981_at	BG066203	Camk2d	Calcium/calmodulin-dependent protein kinase II; delta	1	1	1	1	1	1	0	0	1	7												1	1	Homologene group 55561	9	1	1	1	1	0	0	1	0	1	0	1	0	0	0	0	1	0	1
1442984_at	BG066695	Helz	Helicase with zinc finger domain	1	1	1	1	1	1	0	0	1	7													1	Homologene group 8918	8	0	1	1	1	0	0	1	0	1	0	1	0	0	0	0	1	0	1
1429930_at	AK006449	MGI:1919120	nasopharyngeal epithelium specific protein 1	1	1	1	1	1	1	0	0	1	7
1424465_at	BC024862	AI413631	expressed sequence AI413631	1	1	1	1	1	1	0	0	1	7
1426928_at	BC024674	4633402D15Rik	RIKEN cDNA 4633402D15 gene	1	1	1	1	1	1	0	0	1	7
1416427_at	NM_017367	Ccni	cyclin I	1	1	1	1	1	1	0	0	1	7												1	1	Homologene group 4979	6	0	1	1	0	0	0	0	0	1	0	1	0	0	0	0	1	0	1
1452389_at	L24495	Tnfrsf7	tumor necrosis factor receptor superfamily; member 7	1	1	1	1	1	1	0	0	1	7
1448617_at	NM_007651	Cd53	CD53 antigen	1	1	1	1	1	1	0	0	1	7												1	1	Homologene group 20152	5	0	1	1	0	0	0	0	0	1	0	1	0	0	0	0	1	0	0
1426170_a_at	U34882	Cd8b1	CD8 antigen; beta chain 1	1	1	1	1	1	1	0	0	1	7												1	1	Homologene group 3621	5	0	1	1	0	0	0	0	0	1	0	0	0	0	0	0	1	0	1
1436723_at	BB258991	Fshprh1	FSH primary response 1	1	1	1	1	1	1	0	0	1	7
1425642_at	BC004690	BC004690	cDNA sequence BC004690	1	1	1	1	1	1	0	0	1	7
1436352_at	BF226994	5730599I05Rik	RIKEN cDNA 5730599I05 gene	1	1	1	1	1	1	0	0	1	7
1437297_at	BB409788	Chd8	chromodomain helicase DNA binding protein 8	1	1	1	1	1	1	0	0	1	7												1	1	Homologene group 72405	4	0	1	1	0	0	0	0	0	1	0	0	0	0	0	0	1	0	0
1453844_at	AK009012	Chit1	Chitinase 1 (chitotriosidase)	1	1	1	1	1	1	0	0	1	7												1	0	Homologene group 68318	9	1	0	1	1	0	0	1	0	1	1	0	0	1	1	0	1	1	0
1429553_at	AK004006	Cilp2	cartilage intermediate layer protein 2	1	1	1	1	1	1	0	0	1	7												1	1	Homologene group 17713	5	0	1	1	0	0	0	0	0	1	0	1	0	0	0	0	1	0	0
1435938_at	AA197362	2610318C08Rik	RIKEN cDNA 2610318C08 gene	1	1	1	1	1	1	0	0	1	7
1448761_a_at	NM_017478	Copg2	coatomer protein complex; subunit gamma 2	1	1	1	1	1	1	0	0	1	7												1	0	Homologene group 56292	15	1	1	0	1	1	1	1	0	1	1	1	1	1	1	1	1	1	1
1433715_at	BB426433	Cpne7	copine VII	1	1	1	1	1	1	0	0	1	7												1	1	Homologene group 65128	4	0	1	1	0	0	0	0	0	1	0	1	0	0	0	0	0	0	0
1452754_at	AK017880	5730592L21Rik	RIKEN cDNA 5730592L21 gene	1	1	1	1	1	1	0	0	1	7
1422012_at	U21729	Crhr2	corticotropin releasing hormone receptor 2	1	1	1	1	1	1	0	0	1	7												1	1	Homologene group 55612	7	0	1	1	1	0	0	1	0	1	0	0	0	0	0	0	1	0	1
1418476_at	NM_018827	Crlf1	cytokine receptor-like factor 1	1	1	1	1	1	1	0	0	1	7												1	1	Homologene group 3489	5	0	1	1	0	0	0	0	0	1	0	1	0	0	0	0	1	0	0
1452055_at	BB770944	Ctdsp1	CTD (carboxy-terminal domain; RNA polymerase II; polypeptide A) small phosphatase 1	1	1	1	1	1	1	0	0	1	7												1	1	Homologene group 100834	5	0	1	1	0	0	0	0	0	1	0	1	0	0	0	0	1	0	0
1418482_at	NM_019720	Cyb561d2	cytochrome b-561 domain containing 2	1	1	1	1	1	1	0	0	1	7												1	1	Homologene group 38261	4	0	1	1	0	0	0	0	0	1	0	1	0	0	0	0	0	0	0
1441653_at	BB228771	D030022P06Rik	RIKEN cDNA D030022P06 gene	1	1	1	1	1	1	0	0	1	7
1435050_at	BB353607	B930094H20Rik	RIKEN cDNA B930094H20 gene	1	1	1	1	1	1	0	0	1	7
1428408_a_at	BI102044	D12Ertd551e	DNA segment; Chr 12; ERATO Doi 551; expressed	1	1	1	1	1	1	0	0	1	7
1426780_at	AV247381	D14Ertd436e	DNA segment; Chr 14; ERATO Doi 436; expressed	1	1	1	1	1	1	0	0	1	7												1	1	Homologene group 45423	8	0	1	1	1	0	0	1	0	1	0	1	0	0	0	0	1	0	1
1451176_at	BC025825	D430028G21Rik	RIKEN cDNA D430028G21 gene	1	1	1	1	1	1	0	0	1	7												1	1	Homologene group 17004	4	0	1	1	0	0	0	0	0	1	0	0	0	0	0	0	1	0	0
1448520_at	NM_133865	Dclre1b	DNA cross-link repair 1B; PSO2 homolog (S. cerevisiae)	1	1	1	1	1	1	0	0	1	7												1	1	Homologene group 32553	8	0	1	1	0	0	0	0	0	1	0	1	0	1	0	0	1	1	1
1448446_at	NM_016874	Deaf1	deformed epidermal autoregulatory factor 1 (Drosophila)	1	1	1	1	1	1	0	0	1	7												1	1	Homologene group 9647	8	0	1	1	1	0	0	1	0	1	0	1	0	0	0	0	1	0	1
1437051_at	AV300013	Dffb	DNA fragmentation factor; beta subunit	1	1	1	1	1	1	0	0	1	7												1	1	Homologene group 3241	8	0	1	1	1	0	0	1	0	1	0	1	0	0	0	0	1	0	1
1451895_a_at	BC004738	---	---	1	1	1	1	1	1	0	0	1	7
1449929_at	NM_025975	Tcte1l	t-complex-associated-testis-expressed 1-like	1	1	1	1	1	1	0	0	1	7
1430825_at	AK021367	E130102C15Rik	RIKEN cDNA E130102C15 gene	1	1	1	1	1	1	0	0	1	7
1458461_at	BB703986	E330021D16Rik	RIKEN cDNA E330021D16 gene	1	1	1	1	1	1	0	0	1	7
1420079_at	AI326092	LOC435508	similar to putative pheromone receptor	1	1	1	1	1	1	0	0	1	7
1434127_a_at	BB252350	H3f3a	H3 histone; family 3A	1	1	1	1	1	1	0	0	1	7												1
1460021_at	BB825323	Chd9	Chromodomain helicase DNA binding protein 9	1	1	1	1	1	1	0	0	1	7												1	1	Homologene group 11844	5	0	1	0	0	0	0	0	0	1	0	1	0	0	0	0	1	0	1
1444962_at	AU043557	---	Sp100-rs1 mRNA; partial sequence	1	1	1	1	1	1	0	0	1	7
1422140_at	NM_033616	---	---	1	1	1	1	1	1	0	0	1	7
1449322_at	BC003761	Ptp4a1	protein tyrosine phosphatase 4a1	1	1	1	1	1	1	0	0	1	7												1
1444649_at	AF253414	---	Adult male testis cDNA; RIKEN full-length enriched library; clone:4921519B16 product:hypothetical protein; full insert sequence	1	1	1	1	1	1	0	0	1	7
1450909_at	BB406487	Eif4e	eukaryotic translation initiation factor 4E	1	1	1	1	1	1	0	0	1	7												1	1	Homologene group 84699	16	1	1	1	1	1	1	1	0	1	1	1	1	1	1	1	0	1	1
1452384_at	AV224446	Enpp3	ectonucleotide pyrophosphatase/phosphodiesterase 3	1	1	1	1	1	1	0	0	1	7												1	1	Homologene group 3683	5	0	1	1	0	0	0	0	0	1	0	0	0	1	0	0	1	0	0
1425702_a_at	BC011294	Enpp5	ectonucleotide pyrophosphatase/phosphodiesterase 5	1	1	1	1	1	1	0	0	1	7												1	0	Homologene group 23313	5	0	1	1	0	0	0	1	0	1	0	1	0	0	0	0	1	0	0
1419062_at	NM_013813	Epb4.1l3	erythrocyte protein band 4.1-like 3	1	1	1	1	1	1	0	0	1	7												1	1	Homologene group 49308	5	0	0	1	0	0	0	0	0	1	0	1	0	0	0	0	1	0	1
1417513_at	AI255184	Evi5	ecotropic viral integration site 5	1	1	1	1	1	1	0	0	1	7												1	0	Homologene group 88726	0	0	0	0	0	0	0	0	0	1	0	0	0	0	0	0	0	0	0
1434703_at	BG071142	Extl3	exostoses (multiple)-like 3	1	1	1	1	1	1	0	0	1	7												1	1	Homologene group 1103	9	1	1	1	1	0	0	1	0	1	0	1	0	0	0	0	1	0	1
1446558_at	BB200185	F730015K02Rik	RIKEN cDNA F730015K02 gene	1	1	1	1	1	1	0	0	1	7
1418438_at	NM_007980	Fabp2	fatty acid binding protein 2; intestinal	1	1	1	1	1	1	0	0	1	7												1	1	Homologene group 107	6	0	1	1	0	0	0	0	0	1	0	1	0	0	0	0	1	0	1
1457135_at	AW048300	---	Gene model 523; (NCBI)	1	1	1	1	1	1	0	0	1	7
1456038_at	BB003709	Fbxl4	F-box and leucine-rich repeat protein 4	1	1	1	1	1	1	0	0	1	7												1	1	Homologene group 8128	8	0	1	1	1	0	0	1	0	1	0	1	0	0	0	0	1	0	1
1420690_at	NM_008002	Fgf10	fibroblast growth factor 10	1	1	1	1	1	1	0	0	1	7												1	1	Homologene group 3284	5	0	1	1	0	0	0	0	0	1	0	1	0	0	0	0	1	0	0
1437075_at	BB099015	Frmd3	FERM domain containing 3	1	1	1	1	1	1	0	0	1	7												1	0	Homologene group 16012	6	0	1	1	1	0	0	1	0	1	0	1	0	0	0	0	1	0	0
1432381_a_at	AK005924	Fsip1	fibrous sheath-interacting protein 1	1	1	1	1	1	1	0	0	1	7												1	1	Homologene group 12390	6	0	1	1	0	0	0	0	0	1	0	1	0	0	0	0	1	0	1
1421978_at	AF326550	Gad2	glutamic acid decarboxylase 2	1	1	1	1	1	1	0	0	1	7												1	1	Homologene group 20223	5	0	1	1	0	0	0	0	0	1	0	0	0	0	0	0	1	0	1
1452567_at	L10908	---	---	1	1	1	1	1	1	0	0	1	7
1450127_a_at	NM_008101	Gcgr	glucagon receptor	1	1	1	1	1	1	0	0	1	7												1	1	Homologene group 131	5	0	1	1	0	0	0	0	0	1	0	1	0	0	0	0	1	0	0
1456833_at	BB353220	---	G protein-coupled receptor GPR17	1	1	1	1	1	1	0	0	1	7
1455476_a_at	BE686504	Gse1	genetic suppressor element 1	1	1	1	1	1	1	0	0	1	7												1	1	Homologene group 40964	6	0	1	1	0	0	0	0	0	1	0	1	0	0	0	0	1	0	1
1430802_at	AK013097	H2-Q8	histocompatibility 2; Q region locus 8	1	1	1	1	1	1	0	0	1	7
1458049_at	BB667582	---	---	1	1	1	1	1	1	0	0	1	7
1460584_at	AV272180	B430315C20Rik	RIKEN cDNA B430315C20 gene	1	1	1	1	1	1	0	0	1	7
1450889_at	BB206482	Smarca3	SWI/SNF related; matrix associated; actin dependent regulator of chromatin; subfamily a; member 3	1	1	1	1	1	1	0	0	1	7
1417637_a_at	NM_010440	Hmg20b	high mobility group 20 B	1	1	1	1	1	1	0	0	1	7												1	1	Homologene group 74949	4	0	1	1	0	0	0	0	0	1	0	1	0	0	0	0	0	0	0
1426953_at	AU018946	Hmgb2l1	high mobility group box 2-like 1	1	1	1	1	1	1	0	0	1	7												1	1	Homologene group 4007	7	0	1	1	0	0	0	1	0	1	0	1	0	0	0	0	1	0	1
1429920_at	AK016641	4933403M22Rik	RIKEN cDNA 4933403M22 gene	1	1	1	1	1	1	0	0	1	7
1418761_at	BB499476	Igf2bp1	insulin-like growth factor 2; binding protein 1	1	1	1	1	1	1	0	0	1	7												1	1	Homologene group 4772	8	0	1	1	1	0	0	1	0	1	0	1	0	0	0	0	1	0	1
1433731_at	BG092043	Igf2bp3	insulin-like growth factor 2; binding protein 3	1	1	1	1	1	1	0	0	1	7												1	1	Homologene group 4773	6	0	1	1	0	0	0	0	0	1	0	1	0	0	0	0	1	0	1
1450273_at	NM_133193	Il1rl2	interleukin 1 receptor-like 2	1	1	1	1	1	1	0	0	1	7												1	1	Homologene group 2860	4	0	1	1	0	0	0	0	0	1	0	0	0	0	0	0	1	0	0
1441280_at	BF322939	Kcnk12	potassium channel; subfamily K; member 12	1	1	1	1	1	1	0	0	1	7												1	1	Homologene group 11107	5	0	1	1	0	0	0	0	0	1	0	1	0	0	0	0	1	0	0
1429303_at	AK018361	Zfp393	zinc finger protein 393	1	1	1	1	1	1	0	0	1	7
1441200_at	BB327909	Klf3	Kruppel-like factor 3 (basic)	1	1	1	1	1	1	0	0	1	7												1	1	Homologene group 7396	6	0	1	1	0	0	0	0	0	1	0	1	0	0	0	0	1	0	1
1424887_at	BC012312	Klhdc4	kelch domain containing 4	1	1	1	1	1	1	0	0	1	7												1	0	Homologene group 69234	14	0	1	0	1	1	0	1	1	1	1	1	1	1	1	1	1	1	1
1435712_a_at	AW907444	Rps18	ribosomal protein S18	1	1	1	1	1	1	0	0	1	7												1	0	Homologene group 109622	2	0	0	1	0	0	0	0	0	1	0	0	0	0	0	0	1	0	0
1438081_at	BB794635	---	Transcribed locus	1	1	1	1	1	1	0	0	1	7
1449318_at	NM_134028	Tubg2	tubulin; gamma 2	1	1	1	1	1	1	0	0	1	7												1	1	Homologene group 69216	5	0	1	1	1	0	0	1	0	1	0	0	0	0	0	0	0	0	0
1424767_at	AB019618	Cdh22	cadherin 22	1	1	1	1	1	1	0	0	1	7												1	1	Homologene group 23148	3	0	1	0	0	0	0	0	0	1	0	0	0	0	0	0	0	0	1
1416088_a_at	NM_009091	Rps15	ribosomal protein S15	1	1	1	1	1	1	0	0	1	7												1	0	Homologene group 117955	2	0	0	1	0	0	0	0	0	1	0	0	0	0	0	0	1	0	0
1437481_at	AV032349	LOC433138	similar to RIKEN cDNA 4921517J08 gene	1	1	1	1	1	1	0	0	1	7
1429633_at	AK014072	MGI:2443930	Mblk1-related protein-2	1	1	1	1	1	1	0	0	1	7
1416040_at	NM_026334	Lipf	lipase; gastric	1	1	1	1	1	1	0	0	1	7												1	1	Homologene group 68139	5	0	1	1	1	0	0	0	0	1	0	0	0	0	0	0	1	0	0
1416836_at	BC011058	Lrp10	low-density lipoprotein receptor-related protein 10	1	1	1	1	1	1	0	0	1	7												1	1	Homologene group 8535	5	0	1	1	0	0	0	0	0	1	0	1	0	0	0	0	1	0	0
1451022_at	BB437173	Lrp6	low density lipoprotein receptor-related protein 6	1	1	1	1	1	1	0	0	1	7												1	1	Homologene group 1747	5	0	1	1	0	0	0	0	0	1	0	0	0	0	0	0	1	0	1
1449156_at	NM_008534	Ly9	lymphocyte antigen 9	1	1	1	1	1	1	0	0	1	7												1	1	Homologene group 1759	4	0	1	1	0	0	0	0	0	1	0	0	0	0	0	0	1	0	0
1424718_at	M18775	Mapt	microtubule-associated protein tau	1	1	1	1	1	1	0	0	1	7												1	1	Homologene group 74962	2	0	0	1	0	0	0	0	0	0	0	0	0	0	0	0	0	0	1
1455827_at	BB003847	Mbnl2	muscleblind-like 2	1	1	1	1	1	1	0	0	1	7												1	1	Homologene group 76766	5	0	1	0	0	0	0	0	0	1	0	1	0	0	0	0	1	0	1
1460586_at	BE573060	Egfl4	EGF-like-domain; multiple 4	1	1	1	1	1	1	0	0	1	7
1436018_at	BE951772	---	---	1	1	1	1	1	1	0	0	1	7
1452335_at	AV024565	2810423E13Rik	RIKEN cDNA 2810423E13 gene	1	1	1	1	1	1	0	0	1	7
1438239_at	BG073178	Mid1	RIKEN cDNA C230067J06 gene	1	1	1	1	1	1	0	0	1	7												1	1	Homologene group 7837	5	0	1	1	0	0	0	0	0	1	0	0	0	0	0	0	1	0	1
1423848_at	BC008161	Mphosph6	M phase phosphoprotein 6	1	1	1	1	1	1	0	0	1	7												1	1	Homologene group 38100	6	0	1	1	0	0	0	0	0	1	0	1	0	0	0	0	1	0	1
1421880_at	BB381813	Mtmr1	myotubularin related protein 1	1	1	1	1	1	1	0	0	1	7												1	1	Homologene group 2840	6	0	1	1	0	0	0	0	0	1	0	1	0	0	0	0	1	0	1
1430269_at	AK004148	1110037P11Rik	RIKEN cDNA 1110037P11 gene	1	1	1	1	1	1	0	0	1	7
1419272_at	BC005591	Myd88	myeloid differentiation primary response gene 88	1	1	1	1	1	1	0	0	1	7												1	1	Homologene group 1849	8	0	1	1	1	0	0	1	0	1	0	1	0	0	0	0	1	0	1
1424988_at	BC010206	Mylip	myosin regulatory light chain interacting protein	1	1	1	1	1	1	0	0	1	7												1	1	Homologene group 8309	8	0	1	1	1	0	0	1	0	1	0	1	0	0	0	0	1	0	1
1433433_at	BM225168	Myst2	MYST histone acetyltransferase 2	1	1	1	1	1	1	0	0	1	7												1	1	Homologene group 5134	8	0	1	1	1	0	0	1	0	1	0	1	0	0	0	0	1	0	1
1435961_at	BB702376	BC047219	cDNA sequence BC047219	1	1	1	1	1	1	0	0	1	7
1444163_at	BB049667	BB049667	expressed sequence BB049667	1	1	1	1	1	1	0	0	1	7
1428248_at	AK005038	Nfx1	nuclear transcription factor; X-box binding 1	1	1	1	1	1	1	0	0	1	7												1	1	Homologene group 1875	15	1	1	1	1	1	1	1	0	1	0	1	1	1	0	1	1	1	1
1422342_at	NM_008703	Nmbr	neuromedin B receptor	1	1	1	1	1	1	0	0	1	7												1	1	Homologene group 20560	6	0	1	1	0	0	0	0	0	1	0	1	0	0	0	0	1	0	1
1423826_at	BC024616	AI326906	expressed sequence AI326906	1	1	1	1	1	1	0	0	1	7
1424775_at	BC018470	Oas1a	2'-5' oligoadenylate synthetase 1A	1	1	1	1	1	1	0	0	1	7
1424502_at	BC024542	Oit1	oncoprotein induced transcript 1	1	1	1	1	1	1	0	0	1	7												1	1	Homologene group 16354	5	0	1	1	0	0	0	0	0	1	0	0	0	0	0	0	1	0	1
1422285_at	NM_011021	Otp	orthopedia homolog (Drosophila)	1	1	1	1	1	1	0	0	1	7												1	0	Homologene group 7874	5	0	1	1	1	0	0	1	0	1	0	0	0	0	0	0	1	0	0
1417575_at	AK006346	Otub2	OTU domain; ubiquitin aldehyde binding 2	1	1	1	1	1	1	0	0	1	7												1	1	Homologene group 57056	4	0	1	1	0	0	0	0	0	1	0	0	0	0	0	0	1	0	0
1452094_at	AI314028	P4ha1	procollagen-proline; 2-oxoglutarate 4-dioxygenase (proline 4-hydroxylase); alpha 1 polypeptide	1	1	1	1	1	1	0	0	1	7												1	1	Homologene group 30998	9	1	1	1	1	0	0	1	0	1	0	1	0	0	0	0	1	0	1
1428931_a_at	AK014142	Parp6	poly (ADP-ribose) polymerase family; member 6	1	1	1	1	1	1	0	0	1	7												1	0	Homologene group 10627	4	0	1	1	0	0	0	0	0	1	0	1	0	0	0	0	0	0	1
1449403_at	NM_008804	Pde9a	phosphodiesterase 9A	1	1	1	1	1	1	0	0	1	7												1	0	Homologene group 113697	3	0	1	1	0	0	0	0	0	0	0	1	0	0	0	0	0	0	1
1415729_at	BQ174223	Pdpk1	3-phosphoinositide dependent protein kinase-1	1	1	1	1	1	1	0	0	1	7												1	0	Homologene group 37643	9	1	1	1	1	0	0	1	0	1	0	1	0	1	0	0	0	1	1
1422091_at	BC018418	Pfkfb2	6-phosphofructo-2-kinase/fructose-2;6-biphosphatase 2	1	1	1	1	1	1	0	0	1	7												1	1	Homologene group 88554	14	0	1	1	0	1	1	0	0	1	1	1	1	1	1	1	1	1	1
1451149_at	BC008527	Pgm2	phosphoglucomutase 2	1	1	1	1	1	1	0	0	1	7												1	1	Homologene group 1979	16	1	1	1	1	1	1	1	0	1	1	1	1	1	1	1	0	1	1
1452485_at	AJ457190	Phospho1	phosphatase; orphan 1	1	1	1	1	1	1	0	0	1	7												1	1	Homologene group 13330	8	0	1	1	0	0	0	0	0	1	0	1	0	1	0	0	1	1	1
1448896_at	NM_008838	Pigf	phosphatidylinositol glycan; class F	1	1	1	1	1	1	0	0	1	7												1	1	Homologene group 31103	4	0	1	0	0	0	0	0	0	1	0	1	0	0	0	0	1	0	0
1460326_at	AI528567	6330412C24Rik	RIKEN cDNA 6330412C24 gene	1	1	1	1	1	1	0	0	1	7
1434980_at	AV230647	---	Transcribed locus	1	1	1	1	1	1	0	0	1	7
1418987_at	AF112983	Pla2g2d	phospholipase A2; group IID	1	1	1	1	1	1	0	0	1	7												1	1	Homologene group 7892	4	0	1	1	0	0	0	0	0	1	0	0	0	0	0	0	1	0	0
1456231_at	BB315153	Pla2g3	phospholipase A2; group III	1	1	1	1	1	1	0	0	1	7												1	1	Homologene group 9251	5	0	1	1	0	0	0	0	0	1	0	1	0	0	0	0	1	0	0
1435363_at	BG073502	Plekhg1	pleckstrin homology domain containing; family G (with RhoGef domain) member 1	1	1	1	1	1	1	0	0	1	7												1	1	Homologene group 18897	6	0	1	1	0	0	0	0	0	1	0	1	0	0	0	0	1	0	1
1451475_at	BC019530	Plxnd1	Plexin D1	1	1	1	1	1	1	0	0	1	7												1	0	Homologene group 22866	4	0	1	1	0	0	0	0	0	1	0	0	0	0	0	0	1	0	1
1429686_at	BG070811	---	---	1	1	1	1	1	1	0	0	1	7
1431373_at	AK012523	Pop5	processing of precursor 5; ribonuclease P/MRP family (S. cerevisiae)	1	1	1	1	1	1	0	0	1	7												1	1	Homologene group 41076	6	0	1	1	0	0	0	0	0	1	0	1	0	0	0	0	1	0	1
1423606_at	BI110565	Postn	periostin; osteoblast specific factor	1	1	1	1	1	1	0	0	1	7												1	1	Homologene group 4730	8	0	1	1	1	0	0	1	0	1	0	1	0	0	0	0	1	0	1
1423703_at	BC014688	Ppan	peter pan homolog (Drosophila)	1	1	1	1	1	1	0	0	1	7												1	1	Homologene group 5690	16	1	1	1	1	1	1	1	0	1	1	1	1	1	1	1	1	1	0
1437751_at	AV337619	---	---	1	1	1	1	1	1	0	0	1	7
1416498_at	NM_008908	Ppic	peptidylprolyl isomerase C	1	1	1	1	1	1	0	0	1	7												1	1	Homologene group 727	7	0	1	1	0	0	0	0	0	1	0	1	0	1	0	1	0	0	1
1453127_at	AK009235	MGI:1919137	protein phosphatase 2C zeta	1	1	1	1	1	1	0	0	1	7
1417591_at	NM_133783	Ptges2	prostaglandin E synthase 2	1	1	1	1	1	1	0	0	1	7												1	1	Homologene group 11819	11	1	1	1	1	0	0	1	0	1	0	1	0	1	0	0	1	1	1
1419641_at	BM220305	Purb	purine rich element binding protein B	1	1	1	1	1	1	0	0	1	7												1	0	Homologene group 69087	7	1	0	1	1	0	0	1	0	1	0	1	0	1	0	0	0	1	0
1428701_at	AK004821	Pvrl4	Poliovirus receptor-related 4	1	1	1	1	1	1	0	0	1	7												1	1	Homologene group 32744	3	0	1	1	0	0	0	0	0	1	0	0	0	0	0	0	0	0	0
1429317_at	AK012351	Qrsl1	Glutaminyl-tRNA synthase (glutamine-hydrolyzing)-like 1	1	1	1	1	1	1	0	0	1	7												1	1	Homologene group 6699	17	1	1	1	1	1	1	1	0	1	1	1	1	1	1	1	1	1	1
1415734_at	NM_009005	Rab7	RAB7; member RAS oncogene family	1	1	1	1	1	1	0	0	1	7												1	1	Homologene group 3408	17	1	1	1	1	1	1	1	0	1	1	1	1	1	1	1	1	1	1
1417248_at	NM_009067	Ralbp1	ralA binding protein 1	1	1	1	1	1	1	0	0	1	7												1	1	Homologene group 4940	9	1	1	1	1	0	0	1	0	1	0	1	0	0	0	0	1	0	1
1426968_a_at	BG073496	Rdh10	retinol dehydrogenase 10 (all-trans)	1	1	1	1	1	1	0	0	1	7												1	1	Homologene group 14061	6	0	1	1	0	0	0	0	0	1	0	1	0	0	0	0	1	0	1
1432053_at	AK016791	Rfx4	regulatory factor X; 4 (influences HLA class II expression)	1	1	1	1	1	1	0	0	1	7												1	1	Homologene group 31119	6	0	1	1	0	0	0	0	0	1	0	1	0	0	0	0	1	0	1
1429319_at	BM243660	Rhoh	ras homolog gene family; member H	1	1	1	1	1	1	0	0	1	7												1	1	Homologene group 3180	6	0	1	1	0	0	0	0	0	1	0	1	0	0	0	0	1	0	1
1419110_at	BM228482	Riok1	RIO kinase 1 (yeast)	1	1	1	1	1	1	0	0	1	7												1	1	Homologene group 6950	17	1	1	1	1	1	1	1	0	1	1	1	1	1	1	1	1	1	1
1455500_at	AW556558	D11Ertd759e	DNA segment; Chr 11; ERATO Doi 759; expressed	1	1	1	1	1	1	0	0	1	7
1423650_at	BC004739	Rnf26	ring finger protein 26	1	1	1	1	1	1	0	0	1	7												1
1450887_at	AK005025	Rqcd1	rcd1 (required for cell differentiation) homolog 1 (S. pombe)	1	1	1	1	1	1	0	0	1	7												1	1	Homologene group 3973	18	1	1	1	1	1	1	1	1	1	1	1	1	1	1	1	1	1	1
1455026_at	BE947961	9330180L10Rik	RIKEN cDNA 9330180L10 gene	1	1	1	1	1	1	0	0	1	7
1433974_at	BB293127	Sephs1	selenophosphate synthetase 1	1	1	1	1	1	1	0	0	1	7												1	1	Homologene group 56558	8	0	1	1	1	0	0	1	0	1	0	1	0	0	0	0	1	0	1
1449500_at	NM_027548	Serpinb7	serine (or cysteine) proteinase inhibitor; clade B; member 7	1	1	1	1	1	1	0	0	1	7												1	1	Homologene group 68363	4	0	1	1	0	0	0	0	0	1	0	0	0	0	0	0	1	0	0
1426854_a_at	BM229104	Set	SET translocation	1	1	1	1	1	1	0	0	1	7												1
1460222_at	NM_009164	Sh3bp1	SH3-domain binding protein 1	1	1	1	1	1	1	0	0	1	7												1	0	Homologene group 7534	5	0	1	1	0	0	0	0	0	1	0	1	0	0	0	0	1	0	1
1449163_at	NM_023059	AI256711	expressed sequence AI256711	1	1	1	1	1	1	0	0	1	7
1453472_a_at	AK016183	Slamf7	SLAM family member 7	1	1	1	1	1	1	0	0	1	7												1	1	Homologene group 49660	4	0	1	1	0	0	0	0	0	1	0	0	0	0	0	0	1	0	0
1420697_at	NM_023044	Slc15a3	solute carrier family 15; member 3	1	1	1	1	1	1	0	0	1	7												1	1	Homologene group 69222	3	0	0	1	0	0	0	0	0	1	0	0	0	0	0	0	1	0	0
1420138_at	AI323572	Slc19a1	solute carrier family 19 (sodium/hydrogen exchanger); member 1	1	1	1	1	1	1	0	0	1	7												1	1	Homologene group 57139	6	0	1	1	0	0	0	0	0	1	0	1	0	0	0	0	1	0	1
1456971_at	BB280296	Slc1a7	solute carrier family 1 (glutamate transporter); member 7	1	1	1	1	1	1	0	0	1	7												1	1	Homologene group 21327	5	0	0	1	0	0	0	0	0	1	0	1	0	0	0	0	1	0	1
1423108_at	AV008091	Slc25a20	solute carrier family 25 (mitochondrial carnitine/acylcarnitine translocase); member 20	1	1	1	1	1	1	0	0	1	7												1	1	Homologene group 331	14	1	0	1	1	1	0	1	0	1	1	1	1	1	1	1	1	1	0
1419657_a_at	BB503267	C330005L02Rik	RIKEN cDNA C330005L02 gene	1	1	1	1	1	1	0	0	1	7
1460565_at	BF134253	Slc41a1	solute carrier family 41; member 1	1	1	1	1	1	1	0	0	1	7												1	1	Homologene group 14871	5	1	1	0	0	0	0	0	0	1	0	1	0	0	0	0	0	0	1
1418612_at	NM_011407	Slfn1	schlafen 1	1	1	1	1	1	1	0	0	1	7													0	Homologene group 86967	0	0	0	1	0	0	0	0	0	0	0	0	0	0	0	0	0	0	0
1452789_at	AK012171	Snn	stannin	1	1	1	1	1	1	0	0	1	7												1	1	Homologene group 81710	5	0	1	1	0	0	0	0	0	1	0	1	0	0	0	0	0	0	1
1435655_at	BG807990	Rpl12 /// LOC432518	ribosomal protein L12 /// similar to 60S ribosomal protein L12	1	1	1	1	1	1	0	0	1	7
1451602_at	BC025911	Snx6	sorting nexin 6	1	1	1	1	1	1	0	0	1	7												1	0	Homologene group 12304	7	0	1	1	1	0	0	1	0	1	0	1	0	0	0	0	1	0	1
1423362_at	AV247637	Sort1	sortilin 1	1	1	1	1	1	1	0	0	1	7												1	1	Homologene group 39282	5	0	1	1	0	0	0	0	0	1	0	1	0	0	0	0	1	0	0
1440509_at	AV255326	Sox30	SRY-box containing gene 30	1	1	1	1	1	1	0	0	1	7												1	1	Homologene group 34027	5	0	1	1	0	0	0	0	0	1	0	0	0	0	0	0	1	0	1
1436375_at	C85414	---	---	1	1	1	1	1	1	0	0	1	7
1418076_at	NM_011176	St14	suppression of tumorigenicity 14 (colon carcinoma)	1	1	1	1	1	1	0	0	1	7												1	1	Homologene group 7906	5	0	1	1	0	0	0	0	0	1	0	1	0	0	0	0	0	0	1
1416252_at	NM_134115	Stk38	serine/threonine kinase 38	1	1	1	1	1	1	0	0	1	7												1	1	Homologene group 56033	10	0	1	1	1	0	0	1	0	1	0	1	0	1	0	0	1	1	1
1432350_at	AK004279	Sync	syncoilin	1	1	1	1	1	1	0	0	1	7												1	1	Homologene group 11351	4	0	1	1	0	0	0	0	0	1	0	1	0	0	0	0	0	0	0
1418064_at	NM_023524	Tfpt	TCF3 (E2A) fusion partner	1	1	1	1	1	1	0	0	1	7												1	1	Homologene group 8349	4	0	1	1	0	0	0	0	0	1	0	0	0	0	0	0	1	0	0
1427968_at	AF434662	MGI:2387796	TGIF homeobox 1	1	1	1	1	1	1	0	0	1	7
1451416_a_at	BC026422	Tgm1	transglutaminase 1; K polypeptide	1	1	1	1	1	1	0	0	1	7												1	1	Homologene group 306	7	0	1	1	1	0	0	1	0	1	0	1	0	0	0	0	1	0	0
1424052_at	BC013538	Thap4	THAP domain containing 4	1	1	1	1	1	1	0	0	1	7												1	1	Homologene group 12075	8	0	1	1	0	0	0	1	0	1	0	1	0	1	0	0	1	1	0
1436556_at	BB534983	A930027H06Rik	RIKEN cDNA A930027H06 gene	1	1	1	1	1	1	0	0	1	7
1420514_at	NM_138751	Tm4sf10	transmembrane 4 superfamily member 10	1	1	1	1	1	1	0	0	1	7
1423707_at	BC004841	B230114J08Rik	RIKEN cDNA B230114J08 gene	1	1	1	1	1	1	0	0	1	7
1448882_at	NM_025318	0610009E20Rik	RIKEN cDNA 0610009E20 gene	1	1	1	1	1	1	0	0	1	7
1428034_a_at	BC028507	Tnfrsf9	tumor necrosis factor receptor superfamily; member 9	1	1	1	1	1	1	0	0	1	7												1	1	Homologene group 1199	6	0	1	1	0	0	0	0	0	1	0	1	0	0	0	0	1	0	1
1452766_at	AK013631	2900041A09Rik	RIKEN cDNA 2900041A09 gene	1	1	1	1	1	1	0	0	1	7
1418097_a_at	NM_016715	Tslpr	thymic stromal-derived lymphopoietin; receptor	1	1	1	1	1	1	0	0	1	7
1430535_at	BB045401	1810043J12Rik	RIKEN cDNA 1810043J12 gene	1	1	1	1	1	1	0	0	1	7
1427838_at	M28739	---	---	1	1	1	1	1	1	0	0	1	7
1451936_a_at	BC013688	Txnrd2	thioredoxin reductase 2	1	1	1	1	1	1	0	0	1	7												1	1	Homologene group 4701	9	1	1	1	1	0	0	1	1	1	0	0	0	0	0	0	1	0	1
1423777_at	AK006800	Usp20	ubiquitin specific protease 20	1	1	1	1	1	1	0	0	1	7												1	1	Homologene group 4861	8	0	1	1	1	0	0	1	0	1	0	1	0	0	0	0	1	0	1
1421502_at	NM_031388	Usp26	ubiquitin specific protease 26	1	1	1	1	1	1	0	0	1	7												1	1	Homologene group 12851	3	0	1	1	0	0	0	0	0	1	0	0	0	0	0	0	0	0	0
1450892_a_at	BF321773	Usp4	ubiquitin specific protease 4 (proto-oncogene)	1	1	1	1	1	1	0	0	1	7												1	1	Homologene group 20716	10	0	1	1	0	0	1	0	0	1	1	1	0	1	1	0	1	0	1
1434125_at	AV227804	AW544865	expressed sequence AW544865	1	1	1	1	1	1	0	0	1	7
1452898_at	AK013045	2210415M20Rik	RIKEN cDNA 2210415M20 gene	1	1	1	1	1	1	0	0	1	7
1433676_at	BM232571	Prkwnk1	protein kinase; lysine deficient 1	1	1	1	1	1	1	0	0	1	7
1457810_at	BB769947	Zbtb37	zinc finger and BTB domain containing 37	1	1	1	1	1	1	0	0	1	7													1	Homologene group 13048	5	0	1	1	0	0	0	0	0	0	0	1	0	0	0	0	1	0	1
1433705_at	BG066277	6330415G19Rik	RIKEN cDNA 6330415G19 gene	1	1	1	1	1	1	0	0	1	7
1455153_at	BQ177220	Zfp236	zinc finger protein 236	1	1	1	1	1	1	0	0	1	7												1	1	Homologene group 7198	5	0	1	1	0	0	0	0	0	1	0	0	0	0	0	0	1	0	1
1416111_at	NM_009856	Cd83	CD83 antigen	1	0	0	1	1	1	1	1	1	7					CD83	CD83 antigen precursor (Cell surface protein HB15) (B-cell activation protein).	0	0	0	1	1	1	1	Homologene group 3121	5	0	1	1	0	0	0	0	0	1	0	0	0	0	0	0	1	0	1
1418930_at	NM_021274	Cxcl10	chemokine (C-X-C motif) ligand 10	1	0	0	1	1	1	1	1	1	7	4	5843.31	0	0.0051869	CXCL10	Small-inducible cytokine B10 precursor (CXCL10) (10 kDa interferon- gamma-induced protein) (Gamma-IP10) (IP-10) [Contains: CXCL10(1-73)].	5	0	0	1	1	1	1	Homologene group 1203	4	0	1	1	0	0	0	0	0	1	0	0	0	0	0	0	1	0	0
1418350_at	L07264	Hbegf	heparin-binding EGF-like growth factor	1	0	1	1	1	0	1	1	1	7	2	0	NA	0.00517213	HBEGF	Heparin-binding EGF-like growth factor precursor (HB-EGF) (HBEGF) (Diphtheria toxin receptor) (DT-R).	11	0.000348218	0	1	1	1	1	Homologene group 1466	6	0	1	1	0	0	0	0	0	1	0	1	0	0	0	0	1	0	1
1423602_at	BG064103	Traf1	Tnf receptor-associated factor 1	1	0	0	1	1	1	1	1	1	7					TRAF1	TNF receptor-associated factor 1 (Epstein-Barr virus-induced protein 6).	66	0.000370823	0	2	2	1	1	Homologene group 4138	5	0	1	0	0	0	0	0	0	1	0	1	0	0	0	0	1	0	1
1452217_at	BE570050	1110004P15Rik	RIKEN cDNA 1110004P15 gene	1	1	0	1	1	1	1	0	1	7	20	40121.3	0.128205	0.00522609
1426169_a_at	AF257136	Wbscr5	Williams-Beuren syndrome chromosome region 5 homolog (human)	1	1	1	1	0	0	1	1	1	7	45	35296.1	0.236453	0.00522477
1450020_at	BC012653	Cx3cr1	chemokine (C-X3-C) receptor 1	1	0	1	1	0	1	1	1	1	7	11	6548.31	0.333333	0.00521851								1	0	Homologene group 20350	4	0	1	1	0	0	0	0	0	1	0	0	0	0	0	0	1	0	1
1434272_at	AV231491	Cpeb2	cytoplasmic polyadenylation element binding protein 2	1	1	0	1	1	1	1	0	1	7	5	370.916	0.666667	0.00521294								1	1	Homologene group 17995	5	0	1	1	0	0	0	0	0	1	0	1	0	0	0	0	0	0	1
1426817_at	X82786	Mki67	antigen identified by monoclonal antibody Ki 67	1	0	1	1	0	1	1	1	1	7	6	59.1451	0.2	0.00520492								1	1	Homologene group 1814	3	0	0	1	0	0	0	0	0	1	0	0	0	0	0	0	1	0	0
1449662_at	AW558420	---	---	1	0	1	1	1	0	1	1	1	7	18	28.8805	0.686275	0.00519037
1416645_a_at	NM_007423	Afp	alpha fetoprotein	1	0	1	0	1	1	1	1	1	7	15	0.34202	0.892857	0.00516658								1	1	Homologene group 36278	4	0	1	1	0	0	0	0	0	1	0	0	0	0	0	0	1	0	0
1416303_at	AV360881	Litaf	LPS-induced TN factor	1	0	1	1	0	1	1	1	1	7	1	0	NA	0.0051882								1	1	Homologene group 37974	6	0	1	1	0	0	0	0	0	1	0	1	0	0	0	0	1	0	1
1423225_at	AK007523	MGI:1931466	selenoprotein K	1	1	0	0	1	1	1	1	1	7
1417191_at	NM_013760	Dnajb9	DnaJ (Hsp40) homolog; subfamily B; member 9	1	0	0	1	1	1	1	1	1	7												1	1	Homologene group 32155	6	0	1	1	0	0	0	0	0	1	0	1	0	0	0	0	1	0	1
1426133_a_at	BC020137	1500032H18Rik	RIKEN cDNA 1500032H18 gene	1	0	0	1	1	1	1	1	1	7
1448943_at	AK011144	Nrp1	neuropilin 1	1	0	0	1	1	1	1	1	1	7												1	1	Homologene group 2876	6	0	1	1	0	0	0	0	0	1	0	1	0	0	0	0	1	0	1
1454704_at	BI106458	Scarb2	scavenger receptor class B; member 2	1	0	0	1	1	1	1	1	1	7												1	1	Homologene group 48353	6	0	1	1	0	0	0	0	0	1	0	1	0	0	0	0	1	0	1
1416206_at	D11374	Sipa1	signal-induced proliferation associated gene 1	1	0	0	1	1	1	1	1	1	7												1	1	Homologene group 7940	3	0	1	1	0	0	0	0	0	1	0	0	0	0	0	0	0	0	0
1448325_at	NM_008654	Myd116	myeloid differentiation primary response gene 116	1	0	1	1	1	0	1	1	1	7													1	Homologene group 8639	4	0	1	1	0	0	0	0	0	1	0	0	0	0	0	0	1	0	0
1418580_at	BC024872	---	---	1	0	1	1	1	0	1	1	1	7
1416016_at	AW048052	---	---	1	0	1	1	1	0	1	1	1	7
1451377_a_at	BC025501	Aaas	achalasia; adrenocortical insufficiency; alacrimia	1	1	0	1	1	1	0	0	1	6	28	70.7446	0.660131	0.00519182	AAAS	Aladin (Adracalin).	33	0	0	1	1	1	1	Homologene group 9232	8	0	1	0	1	0	0	1	0	1	0	1	0	1	0	0	1	1	0
1422631_at	BE989096	Ahr	aryl-hydrocarbon receptor	1	1	0	1	1	1	0	0	1	6	6	12566	0	0.00518654	AHR	Aryl hydrocarbon receptor precursor (Ah receptor) (AhR).	24	2.73e-05	0	1	1	1	1	Homologene group 1224	5	0	1	1	0	0	0	0	0	1	0	1	0	0	0	0	0	0	1
1452829_at	AK010453	Cad	carbamoyl-phosphate synthetase 2; aspartate transcarbamylase; and dihydroorotase	1	1	0	1	1	1	0	0	1	6					CAD	CAD protein [Includes: Glutamine-dependent carbamoyl-phosphate synthase (EC 6.3.5.5); Aspartate carbamoyltransferase (EC 2.1.3.2); Dihydroorotase (EC 3.5.2.3)].	25	0.000156573	0	1	1	1	0	Homologene group 1412	16	1	1	1	1	1	1	1	1	1	1	1	1	1	1	1	1	1	0
1450691_at	NM_080643	Caskin2	cask-interacting protein 2	1	0	1	1	1	1	0	0	1	6					CASKIN2	Caskin-2.	0	0	0	1	1	1	1	Homologene group 32485	7	1	1	1	0	0	0	0	0	1	0	1	0	0	0	0	1	0	1
1449839_at	BG070529	Casp3	caspase 3; apoptosis related cysteine protease	1	0	1	1	1	1	0	0	1	6	2	0	NA	0.00515028	CASP3	Caspase-3 precursor (EC 3.4.22.56) (CASP-3) (Apopain) (Cysteine protease CPP32) (Yama protein) (CPP-32) (SREBP cleavage activity 1) (SCA-1) [Contains: Caspase-3 p17 subunit; Caspase-3 p12 subunit].	144	0.00479767	0	1	1	1	1	Homologene group 37912	7	0	1	1	0	0	0	1	0	1	0	1	0	0	0	0	1	0	1
1417910_at	X75483	Ccna2	cyclin A2	1	1	0	1	0	1	0	1	1	6	2	0	NA	0.00512069	CCNA2	Cyclin-A2 (Cyclin-A).	35	0.00018379	0	1	1	1	1	Homologene group 55562	10	0	1	1	1	0	0	1	0	1	0	1	0	1	0	0	1	1	1
1416492_at	NM_007633	Ccne1	cyclin E1	1	0	1	1	1	1	0	0	1	6	37	34555.5	0.316017	0.00518192	CCNE1	G1/S-specific cyclin-E1.	35	9.21e-05	0	2	2	1	1	Homologene group 14452	9	1	1	1	1	0	0	1	0	1	0	1	0	0	0	0	1	0	1
1422484_at	NM_007808	Cycs	cytochrome c; somatic	1	0	1	1	1	1	0	0	1	6	2	0	NA	0.0051507	CYCS	Cytochrome c.	131	0.00177376	0	1	1	1
1431875_a_at	AK017841	E2f1	E2F transcription factor 1	1	0	1	1	1	1	0	0	1	6					E2F1	Transcription factor E2F1 (E2F-1) (Retinoblastoma-binding protein 3) (RBBP-3) (PRB-binding protein E2F-1) (PBR3) (Retinoblastoma-associated protein 1) (RBAP-1).	55	0.000363014	0	2	2	1	1	Homologene group 3828	5	0	1	1	0	0	0	0	0	1	0	1	0	0	0	0	0	0	1
1434604_at	BM236870	Eif5b	Eukaryotic translation initiation factor 5B	1	0	1	1	1	1	0	0	1	6	18	60444.9	0.109091	0.00523018	EIF5B	Eukaryotic translation initiation factor 5B (eIF-5B) (Translation initiation factor IF-2).	107	4.24e-05	0	1	1	1	1	Homologene group 5291	18	1	1	1	1	1	1	1	1	1	1	1	1	1	1	1	1	1	1
1449088_at	NM_007994	Fbp2	fructose bisphosphatase 2	1	0	1	1	1	1	0	0	1	6					FBP2	Fructose-1,6-bisphosphatase isozyme 2 (EC 3.1.3.11) (D-fructose-1,6- bisphosphate 1-phosphohydrolase 2) (FBPase 2).	5	4.78e-06	0	1	1	1	1	Homologene group 55784	6	0	1	1	0	0	0	0	0	1	0	1	0	0	0	0	1	0	1
1428407_at	BG073366	Hnrpa0	heterogeneous nuclear ribonucleoprotein A0	1	1	1	1	1	1	0	0	0	6	6	4190	0.5	0.00518351	HNRPA0	Heterogeneous nuclear ribonucleoprotein A0 (hnRNP A0).	111	0.000104575	0	1	1
1427129_a_at	AW701147	Hnrpr	heterogeneous nuclear ribonucleoprotein R	1	1	1	1	1	0	0	0	1	6	5	278.048	0.333333	0.00520512	HNRPR	Heterogeneous nuclear ribonucleoprotein R (hnRNP R).	113	0.000228954	0	1	1
1449864_at	NM_021283	Il4	interleukin 4	1	0	1	1	1	1	0	0	1	6	23	3639.6	0.228571	0.00520605	IL4	Interleukin-4 precursor (IL-4) (B-cell stimulatory factor 1) (BSF-1) (Lymphocyte stimulatory factor 1) (Binetrakin) (Pitrakinra).	5	8.86e-06	0	1	1	1	1	Homologene group 491	4	0	1	1	0	0	0	0	0	1	0	0	0	0	0	0	1	0	0
1423813_at	BC003427	Kif22	kinesin family member 22	1	1	0	1	1	1	0	0	1	6	19	59.5607	0.393939	0.00512118	KIF22	Kinesin-like protein KIF22 (Kinesin-like DNA-binding protein) (Kinesin-like protein 4).	5	9.3e-06	0	1	1	1	1	Homologene group 32011	7	0	1	1	0	0	0	0	0	1	0	1	0	1	0	0	1	1	0
1415860_at	NM_010655	Kpna2	karyopherin (importin) alpha 2	1	0	1	1	1	1	0	0	1	6	15	1312.56	0.266667	0.00521438	KPNA2	Importin subunit alpha-2 (Karyopherin subunit alpha-2) (SRP1-alpha) (RAG cohort protein 1).	38	0.000721248	0	5	5	1
1426285_at	U12147	Lama2	laminin; alpha 2	1	0	1	1	1	1	0	0	1	6					LAMA2	Laminin subunit alpha-2 precursor (Laminin M chain) (Merosin heavy chain).	2	4.6e-06	0	1	1	1	0	Homologene group 37306	4	1	0	1	0	0	0	0	0	1	0	0	0	0	0	0	1	0	1
1426808_at	X16834	Lgals3	lectin; galactose binding; soluble 3	1	1	1	1	0	1	0	1	0	6	10	20044.6	0.238095	0.0051893	LGALS3	Galectin-3 (Galactose-specific lectin 3) (Mac-2 antigen) (IgE-binding protein) (35 kDa lectin) (Carbohydrate-binding protein 35) (CBP 35) (Laminin-binding protein) (Lectin L-29) (L-31) (Galactoside-binding protein) (GALBP).	12	0.000338446	0	1	1	1	1	Homologene group 37608	6	0	1	1	0	0	0	0	0	1	0	1	0	0	0	0	1	0	1
1421654_a_at	NM_019390	Lmna	lamin A	1	0	1	1	1	1	0	0	1	6					LMNA	Lamin-A/C (70 kDa lamin) (Renal carcinoma antigen NY-REN-32).	29	0.000921722	0	1	1	1	1	Homologene group 41321	6	0	1	1	0	0	0	1	0	1	0	1	0	0	0	0	1	0	0
1451318_a_at	M57697	Lyn	Yamaguchi sarcoma viral (v-yes-1) oncogene homolog	1	0	1	1	1	1	0	0	1	6					LYN	Tyrosine-protein kinase Lyn (EC 2.7.10.2).	104	0.00172482	0	2	2	1	1	Homologene group 55649	6	0	1	1	0	0	0	0	0	1	0	1	0	0	0	0	1	0	1
1427705_a_at	L28118	Nfkb1	nuclear factor of kappa light chain gene enhancer in B-cells 1; p105	1	0	1	1	1	1	0	0	1	6	16	820.938	0.275	0.00521222	NFKB1	Nuclear factor NF-kappa-B p105 subunit (DNA-binding factor KBF1) (EBP- 1) [Contains: Nuclear factor NF-kappa-B p50 subunit].	121	0.00115842	0	2	2	1	1	Homologene group 2971	5	0	1	1	0	0	0	0	0	1	0	0	0	0	0	0	1	0	1
1418634_at	NM_008714	Notch1	Notch gene homolog 1 (Drosophila)	1	1	0	1	1	1	0	0	1	6					NOTCH1	Notch homolog 1, translocation-associated (Drosophila).	4	4.31e-06	0	1	1	1	1	Homologene group 32049	8	0	1	1	1	0	0	1	0	1	0	1	0	0	0	0	1	0	1
1450722_at	NM_016714	Nup50	nucleoporin 50	1	0	1	1	1	1	0	0	1	6	15	131560	0.371429	0.00523612	NUP50	Nucleoporin 50 kDa (Nuclear pore-associated protein 60 kDa-like).	35	5.48e-07	0	1	1	1	1	Homologene group 5190	8	0	1	1	1	0	0	1	0	1	0	1	0	0	0	0	1	0	1
1435679_at	BB770843	Optn	optineurin	1	1	1	1	1	1	0	0	0	6	12	7446.17	0.106061	0.00522466	OPTN	Optineurin (Optic neuropathy-inducing protein) (E3-14.7K-interacting protein) (FIP-2) (Huntingtin-interacting protein HYPL) (NEMO-related protein) (Transcription factor IIIA-interacting protein) (TFIIIA- IntP).	8	3.22e-05	0	1	1	1	1	Homologene group 11085	6	0	1	1	0	0	0	0	0	1	0	1	0	0	0	0	1	0	1
1441026_at	BB552308	Parp4	poly (ADP-ribose) polymerase family; member 4	1	1	1	1	0	1	0	0	1	6	1	0	NA	0.00521517	PARP4	Poly [ADP-ribose] polymerase 4 (EC 2.4.2.30) (PARP-4) (Vault poly(ADP- ribose) polymerase) (VPARP) (193 kDa vault protein) (PARP- related/IalphaI-related H5/proline-rich) (PH5P).	1	0	0	1	1	1	1	Homologene group 114807	5	0	0	1	0	0	0	0	0	1	0	1	0	0	0	0	1	0	1
1451839_a_at	AY007702	Pde7a	phosphodiesterase 7A	1	0	1	1	1	1	0	0	1	6					PDE7A	High affinity cAMP-specific 3',5'-cyclic phosphodiesterase 7A (EC 3.1.4.17) (HCP1) (TM22).	0	0	0	1	1	1	0	Homologene group 1956	5	0	1	1	0	0	0	1	0	1	0	1	0	0	0	0	1	0	0
1422707_at	BB205102	Pik3cg	phosphoinositide-3-kinase; catalytic; gamma polypeptide	1	1	1	1	1	1	0	0	0	6	1	0	NA	0.00517029	PIK3CG	Phosphatidylinositol-4,5-bisphosphate 3-kinase catalytic subunit gamma isoform (EC 2.7.1.153) (PI3-kinase p110 subunit gamma) (PtdIns-3- kinase subunit p110) (PI3K) (PI3Kgamma) (p120-PI3K).	17	0.000649309	0	1	1	1	1	Homologene group 68269	6	0	1	1	0	0	0	0	0	1	0	1	0	0	0	0	1	0	1
1459231_at	BB298101	Pkn1	protein kinase N1	1	1	1	0	1	1	0	0	1	6					PKN1	Serine/threonine-protein kinase N1 (EC 2.7.11.13) (Protein kinase C- like 1) (Protein-kinase C-related kinase 1) (Protein kinase C-like PKN) (Serine-threonine protein kinase N) (Protein kinase PKN-alpha).	25	0.000537443	0	1	1	1	1	Homologene group 48130	5	0	1	1	0	0	0	0	0	1	0	1	0	0	0	0	1	0	0
1423725_at	BC005459	Pls3	plastin 3 (T-isoform)	1	0	1	1	1	1	0	0	1	6	11	105.386	0.436364	0.00522087	PLS3	Plastin-3 (T-plastin).	7	3.64e-06	1	0	1	1	1	Homologene group 68250	17	1	1	1	1	1	1	1	0	1	1	1	1	1	1	1	1	1	1
1427886_at	BC028835	Pom121	nuclear pore membrane protein 121	1	1	1	1	1	1	0	0	0	6	5	195.022	0.6	0.00520339	POM121	POM121 membrane glycoprotein (Rat).	13	0	0	1	1	1	0	Homologene group 70878	6	0	0	1	1	0	0	1	0	1	0	1	0	0	0	0	1	0	1
1460165_at	NM_031868	Ppp1ca	protein phosphatase 1; catalytic subunit; alpha isoform	1	1	1	1	0	1	0	0	1	6					PPP1CA	Serine/threonine-protein phosphatase PP1-alpha catalytic subunit (EC 3.1.3.16) (PP-1A).	76	0.0047551	0	2	2	1	1	Homologene group 105262	16	1	1	1	1	1	1	1	0	1	1	1	1	1	1	1	1	1	0
1426205_at	M27073	Ppp1cb	protein phosphatase 1; catalytic subunit; beta isoform	1	1	1	1	1	0	0	0	1	6					PPP1CB	Serine/threonine-protein phosphatase PP1-beta catalytic subunit (EC 3.1.3.16) (PP-1B).	25	0.000201691	0	1	1	1	1	Homologene group 37659	11	1	1	1	1	0	0	1	0	1	0	1	0	1	0	0	1	1	1
1448632_at	NM_013640	Psmb10	proteasome (prosome; macropain) subunit; beta type 10	1	0	1	1	1	1	0	0	1	6	10	2536.67	0.533333	0.0052159	PSMB10	Proteasome subunit beta type 10 precursor (EC 3.4.25.1) (Proteasome MECl-1) (Macropain subunit MECl-1) (Multicatalytic endopeptidase complex subunit MECl-1).	41	0	0	1	1	1	1	Homologene group 20616	3	0	1	1	0	0	0	0	0	1	0	0	0	0	0	0	0	0	0
1416240_at	NM_011187	Psmb7	proteasome (prosome; macropain) subunit; beta type 7	1	1	1	0	1	1	0	0	1	6					PSMB7	Proteasome subunit beta type 7 precursor (EC 3.4.25.1) (Proteasome subunit Z) (Macropain chain Z) (Multicatalytic endopeptidase complex chain Z).	47	3.69e-05	0	1	1	1	1	Homologene group 2093	15	0	0	1	1	1	1	0	1	1	1	1	1	1	1	1	1	1	1
1438421_at	BI134275	Pvrl1	poliovirus receptor-related 1	1	0	1	1	1	1	0	0	1	6					PVRL1	Poliovirus receptor-related protein 1 precursor (Herpes virus entry mediator C) (HveC) (Nectin-1) (Herpesvirus Ig-like receptor) (HIgR) (CD111 antigen).	6	1.23e-05	0	1	1	1	1	Homologene group 2138	4	0	1	1	0	0	0	0	0	1	0	1	0	0	0	0	0	0	0
1423734_at	BC003828	Rac1	RAS-related C3 botulinum substrate 1	1	1	1	1	1	0	0	0	1	6	1	0	NA	0.00515976	RAC1	Ras-related C3 botulinum toxin substrate 1 precursor (p21-Rac1) (Ras- like protein TC25) (Cell migration-inducing gene 5 protein).	169	0.00122517	4	0	4	1	1	Homologene group 69035	10	0	1	1	1	0	0	0	0	1	1	1	0	1	1	0	0	1	1
1418281_at	NM_011234	Rad51	RAD51 homolog (S. cerevisiae)	1	0	0	1	1	1	0	1	1	6	18	209.33	0.405229	0.00517069	RAD51	DNA repair protein RAD51 homolog 1 (hRAD51) (HsRAD51).	31	0.000680864	0	1	1	1	1	Homologene group 2155	17	1	1	1	1	1	1	0	1	1	1	1	1	1	1	1	1	1	1
1456433_at	BB000798	Rcbtb1	regulator of chromosome condensation (RCC1) and BTB (POZ) domain containing protein 1	1	1	0	1	1	1	0	0	1	6					RCBTB1	RCC1 and BTB domain-containing protein 1 (Regulator of chromosome condensation and BTB domain-containing protein 1) (Chronic lymphocytic leukemia deletion region gene 7 protein) (CLL deletion region gene 7 protein).	0	0	0	1	1	1	1	Homologene group 10061	6	0	1	1	0	0	0	0	0	1	0	1	0	0	0	0	1	0	1
1423148_at	AV347477	Skp1a	S-phase kinase-associated protein 1A	1	0	1	1	1	1	0	0	1	6	2	4190	0	0.00519946	SKP1A	S-phase kinase-associated protein 1A (Cyclin A/CDK2-associated protein p19) (p19A) (p19skp1) (RNA polymerase II elongation factor-like protein) (Organ of Corti protein 2) (OCP-II protein) (OCP-2) (Transcription elongation factor B) (SIII).	64	0.00272	0	1	1	1	1	Homologene group 38775	15	1	1	1	1	1	1	0	0	1	1	1	1	0	1	1	1	1	1
1448707_at	NM_025444	Taf13	TAF13 RNA polymerase II; TATA box binding protein (TBP)-associated factor	1	1	0	1	1	1	0	0	1	6	1	0	NA	0.00518704	TAF13	Transcription initiation factor TFIID subunit 13 (Transcription initiation factor TFIID 18 kDa subunit) (TAF(II)18) (TAFII-18) (TAFII18).	41	0	0	1	1	1	1	Homologene group 4126	10	1	1	1	1	0	0	1	0	1	0	1	0	1	0	0	1	0	1
1422778_at	NM_027139	Taf9	TAF9 RNA polymerase II; TATA box binding protein (TBP)-associated factor	1	1	1	1	1	1	0	0	0	6					TAF9	Transcription initiation factor TFIID subunit 9 (Transcription initiation factor TFIID 31 kDa subunit) (TAFII-31) (TAFII-32) (TAFII32) (STAF31/32).	60	0.000368981	0	2	2	1	1	Homologene group 39986	9	0	1	1	0	1	1	0	0	1	0	1	1	0	0	1	0	0	1
1440841_at	BF714941	Ywhae	Tyrosine 3-monooxygenase/tryptophan 5-monooxygenase activation protein; epsilon polypeptide	1	0	1	1	1	1	0	0	1	6	4	0	1	0.00516743	YWHAE	14-3-3 protein epsilon (14-3-3E).	76	0.00094489	1	1	2	1	1	Homologene group 38223	13	0	1	1	1	0	1	1	0	1	1	1	0	1	1	0	1	1	1
1419332_at	NM_019397	Egfl6	EGF-like-domain; multiple 6	1	1	1	1	1	1	0	0	0	6	62	247295	0.126856	0.00522741								1	0	Homologene group 9166	5	0	1	1	0	0	0	0	0	1	0	1	0	0	0	0	1	0	1
1452968_at	AK003674	Cthrc1	collagen triple helix repeat containing 1	1	1	1	1	1	0	0	0	1	6	46	155795	0.14023	0.00524106								1	1	Homologene group 16320	4	0	0	1	0	0	0	0	0	1	0	1	0	0	0	0	1	0	0
1421732_at	NM_008132	Glrp1	glutamine repeat protein 1	1	0	1	1	1	1	0	0	1	6	38	128501	0.225108	0.00524183
1437677_at	BG063913	1500001M20Rik	RIKEN cDNA 1500001M20 gene	1	0	1	1	1	1	0	0	1	6	13	117087	0.285714	0.00522794								1	0	Homologene group 13754	11	1	1	1	1	0	0	1	0	1	1	1	0	1	1	0	1	0	1
1419793_at	BG069991	---	---	1	1	1	0	1	1	0	0	1	6	46	112231	0.147692	0.00524398
1449060_at	NM_134471	Kif2c	kinesin family member 2C	1	0	1	1	1	1	0	0	1	6	39	106504	0.166667	0.00523593								1	1	Homologene group 21355	6	0	1	1	0	0	0	0	0	1	0	1	0	0	0	0	1	0	1
1416631_at	NM_026193	1810038H16Rik	RIKEN cDNA 1810038H16 gene	1	1	1	1	1	1	0	0	0	6	29	102718	0.1	0.00522977
1459178_at	BG068081	D8Ertd503e	DNA segment; Chr 8; ERATO Doi 503; expressed	1	0	1	1	1	1	0	0	1	6	38	89569.8	0.147186	0.00524535
1451537_at	BC005611	Chi3l1	chitinase 3-like 1	1	1	0	1	1	1	0	0	1	6	36	75764.9	0.194805	0.00523439								1	1	Homologene group 55569	9	0	1	1	0	1	0	0	0	1	1	0	1	0	1	1	1	0	0
1432730_at	AK017932	---	---	1	0	1	1	1	1	0	0	1	6	61	75064.2	0.247748	0.00524156
1453708_a_at	AK019582	Gsto2	glutathione S-transferase omega 2	1	1	0	1	1	1	0	0	1	6	21	73200.4	0.181818	0.00522942								1	1	Homologene group 57057	4	0	1	1	0	0	0	0	0	1	0	0	0	0	0	0	1	0	0
1448317_at	NM_025480	2810021O14Rik	RIKEN cDNA 2810021O14 gene	1	1	1	0	1	1	0	0	1	6	38	72883.6	0.100996	0.00524948
1417599_at	NM_133983	MGI:2183926	B7 homlog 3	1	0	1	1	1	1	0	0	1	6	14	71437.6	0.0833333	0.00522382
1419196_at	NM_032541	Hamp	hepcidin antimicrobial peptide	1	1	1	0	1	1	0	0	1	6	56	70775.3	0.174603	0.00522139								1
1449364_at	NM_020572	Aurkc	aurora kinase C	1	1	1	1	1	1	0	0	0	6	130	69095.3	0.190175	0.00521874								1
1422514_at	NM_009636	Aebp1	AE binding protein 1	1	0	1	1	1	1	0	0	1	6	62	65047.7	0.168293	0.0052327								1	0	Homologene group 878	2	0	0	1	0	0	0	0	0	1	0	1	0	0	0	0	0	0	0
1428422_at	AK008825	2210404D11Rik	RIKEN cDNA 2210404D11 gene	1	1	0	1	1	1	0	0	1	6	19	61741.4	0.157895	0.00523638
1436349_at	BI408855	2700094K13Rik	RIKEN cDNA 2700094K13 gene	1	1	1	1	1	1	0	0	0	6	26	55868.5	0.0916667	0.00523438								1	0	Homologene group 86009	1	0	0	0	0	0	0	0	0	1	0	1	0	0	0	0	0	0	0
1457334_at	BB371179	C130057M05Rik	RIKEN cDNA C130057M05 gene	1	1	1	0	1	1	0	0	1	6	31	52419.9	0.115789	0.0052365
1415671_at	NM_013477	Atp6v0d1	ATPase; H+ transporting; V0 subunit D isoform 1	1	1	0	1	1	1	0	0	1	6	18	52188.8	0.0757576	0.00522055								1	1	Homologene group 3444	17	1	1	1	1	1	1	1	0	1	1	1	1	1	1	1	1	1	1
1454750_a_at	BG069746	BC057552	cDNA sequence BC057552	1	0	1	1	1	1	0	0	1	6	23	49761.4	0.363636	0.00520516								1	1	Homologene group 18182	5	0	1	1	0	0	0	0	0	1	0	1	0	0	0	0	1	0	0
1433610_at	BB522283	AA986860	expressed sequence AA986860	1	0	1	1	1	1	0	0	1	6	27	46241.6	0.27619	0.00523775								1	1	Homologene group 49741	5	0	0	1	0	0	0	0	0	1	0	1	0	0	0	0	1	0	1
1455114_at	BB547482	C86987	expressed sequence C86987	1	1	1	1	1	1	0	0	0	6	20	44719.6	0.2	0.00522597
1429967_at	BI465735	2600002B07Rik	RIKEN cDNA 2600002B07 gene	1	0	1	1	1	1	0	0	1	6	52	44379.7	0.329545	0.00519533
1425159_at	BC024448	0610012C01Rik	RIKEN cDNA 0610012C01 gene	1	1	1	1	1	1	0	0	0	6	48	43325.3	0.251613	0.00522094
1451244_a_at	BC018339	Zfp422	zinc finger protein 422	1	1	1	1	1	1	0	0	0	6	12	41861.6	0.393939	0.00524155								1	1	Homologene group 5067	3	0	0	1	0	0	0	0	0	1	0	0	0	0	0	0	1	0	0
1417896_at	NM_013769	Tjp3	tight junction protein 3	1	0	1	1	1	1	0	0	1	6	17	39573.3	0.397059	0.00519195								1	1	Homologene group 8458	4	0	1	1	0	0	0	0	0	1	0	0	0	0	0	0	1	0	0
1452395_at	AA111022	Med19	mediator of RNA polymerase II transcription; subunit 19 homolog (yeast)	1	0	1	1	1	1	0	0	1	6	42	39544.8	0.140394	0.00524158								1	1	Homologene group 14684	8	0	1	1	1	0	0	1	0	1	0	1	0	0	0	0	1	0	1
1456888_at	BE136572	C230090D14	hypothetical protein C230090D14	1	1	0	1	1	1	0	0	1	6	16	38923	0.175	0.00522995
1419714_at	NM_021893	Pdcd1lg1	programmed cell death 1 ligand 1	0	1	1	1	1	1	0	0	1	6	3	38335.7	0	0.00521788
1457801_at	BB144328	9930024M15Rik	RIKEN cDNA 9930024M15 gene	1	1	1	1	1	1	0	0	0	6	32	37324.3	0.173684	0.00523466
1442840_at	BG070294	---	---	1	0	1	1	1	1	0	0	1	6	65	36634.9	0.220635	0.00522099
1432039_a_at	AK006731	2310006J04Rik	RIKEN cDNA 2310006J04 gene	1	0	1	1	1	1	0	0	1	6	93	34827.7	0.260606	0.00521155
1429253_at	AK018207	Zfp262	zinc finger protein 262	1	1	1	1	1	1	0	0	0	6	7	34748.5	0.285714	0.00521226
1450250_at	NM_130880	AJ430384	cDNA sequence AJ430384	1	1	1	1	1	1	0	0	0	6	32	34671.9	0.17619	0.00523685
1456966_at	BB668091	C920021L13Rik	RIKEN cDNA C920021L13 gene	1	0	1	1	1	1	0	0	1	6	11	34287.7	0.142857	0.00521627
1450995_at	BG245669	Folr1	folate receptor 1 (adult)	1	0	1	1	1	1	0	0	1	6	27	33322.7	0.183333	0.00522872								1	1	Homologene group 7322	5	0	1	1	0	0	0	0	0	1	0	1	0	0	0	0	0	0	1
1415749_a_at	NM_017475	Rragc	Ras-related GTP binding C	1	0	1	1	1	1	0	0	1	6	14	31576.8	0.197802	0.00522495								1	1	Homologene group 39141	8	1	0	1	1	0	0	1	0	1	0	1	0	0	0	0	1	0	1
1432209_at	AK007425	1810010K12Rik	RIKEN cDNA 1810010K12 gene	1	0	1	1	1	1	0	0	1	6	158	29128.1	0.254212	0.00520491
1429817_at	AK016704	4933406N12Rik	RIKEN cDNA 4933406N12 gene	1	0	1	1	1	1	0	0	1	6	20	28885.2	0.0789474	0.00524439
1435650_at	BB082407	Hapln4	hyaluronan and proteoglycan link protein 4	1	0	1	1	1	1	0	0	1	6	28	28265.3	0.210526	0.00523232								1	1	Homologene group 11304	4	0	0	1	0	0	0	0	0	1	0	1	0	0	0	0	1	0	0
1451309_at	BC006592	Arhgap1	Rho GTPase activating protein 1	1	1	1	1	1	0	0	0	1	6	16	27626.3	0.0888889	0.00521219								1	1	Homologene group 20909	10	1	1	1	1	0	1	1	0	1	0	1	0	0	0	0	1	0	1
1448075_at	BG076663	AA408251	Expressed sequence AA408251	1	1	1	0	1	1	0	0	1	6	27	27316.7	0.233333	0.00523495
1449482_at	NM_030082	Hist3h2ba	histone 3; H2ba	1	0	1	1	1	1	0	0	1	6	27	27086.9	0.208333	0.00521852								1	1	Homologene group 113580	9	0	1	1	0	0	0	0	1	1	0	1	0	1	0	0	1	1	1
1422832_at	NM_021340	Rgr	retinal G protein coupled receptor	1	1	1	1	1	1	0	0	0	6	6	26661.5	0	0.00522037								1	1	Homologene group 37709	6	0	1	1	0	0	0	0	0	1	0	1	0	0	0	0	1	0	1
1432412_at	AK020544	9530004P13Rik	RIKEN cDNA 9530004P13 gene	1	1	1	1	0	1	0	0	1	6	94	26642.7	0.319774	0.00523474
1455006_at	W42220	2310016M24Rik	RIKEN cDNA 2310016M24 gene	1	1	1	1	1	1	0	0	0	6	14	26202.4	0.127273	0.00522285								1	1	Homologene group 50025	2	0	0	1	0	0	0	0	0	1	0	0	0	0	0	0	0	0	0
1457755_at	BQ174809	Gng8	guanine nucleotide binding protein (G protein); gamma 8 subunit	1	0	1	1	1	1	0	0	1	6	44	25936.4	0.436667	0.00519502								1	1	Homologene group 7740	4	0	1	1	0	0	0	0	0	1	0	1	0	0	0	0	0	0	0
1418736_at	BC003835	B3galt3	UDP-Gal:betaGlcNAc beta 1;3-galactosyltransferase; polypeptide 3	1	1	1	0	1	1	0	0	1	6	28	25854.3	0.316667	0.00524506
1455367_at	BF020021	Dnd1	dead end homolog 1 (zebrafish)	0	1	1	1	1	1	0	0	1	6	19	25669.8	0.257576	0.00522826								1	1	Homologene group 65262	5	0	1	1	0	0	0	0	0	1	0	0	0	0	0	0	1	0	1
1423507_a_at	BB807595	Sirt2	sirtuin 2 (silent mating type information regulation 2; homolog) 2 (S. cerevisiae)	1	0	1	1	1	1	0	0	1	6	6	25479.8	0	0.00522395								1	1	Homologene group 40823	12	0	1	1	1	1	1	1	0	1	0	1	1	0	1	1	1	0	0
1448471_a_at	NM_007796	Ctla2a	cytotoxic T lymphocyte-associated protein 2 alpha	1	1	0	1	1	1	0	0	1	6	13	25361	0.111111	0.00522145									0	Homologene group 74869	0	0	0	1	0	0	0	0	0	0	0	0	0	0	0	0	0	0	0
1449829_at	NM_008405	Itgb2l	integrin beta 2-like	1	0	1	1	1	1	0	0	1	6	21	25326.1	0.358974	0.00522908
1420496_at	NM_021489	F12	coagulation factor XII (Hageman factor)	1	1	1	1	1	0	0	0	1	6	20	25145.8	0.115385	0.00522645								1	0	Homologene group 425	3	0	1	1	0	0	0	0	0	1	0	0	0	0	0	0	1	0	0
1445035_at	C86683	D6Mit97	DNA segment; Chr 6; Massachusetts Institute of Technology 97	1	1	1	1	1	1	0	0	0	6	44	24964.3	0.18	0.00521212
1421375_a_at	NM_011313	S100a6	S100 calcium binding protein A6 (calcyclin)	1	1	1	1	1	0	0	0	1	6	16	24488	0.216667	0.00523388								1	0	Homologene group 7925	4	0	1	1	0	0	0	0	0	1	0	0	0	0	0	0	1	0	1
1432652_at	AK005767	1700008H02Rik	RIKEN cDNA 1700008H02 gene	1	0	1	1	1	1	0	0	1	6	89	24304.5	0.377551	0.00519847
1441069_at	BG069709	---	Transcribed locus	1	1	1	1	1	1	0	0	0	6	9	23956	0.0833333	0.00523655
1421601_at	NM_133256	Gsh2	genomic screened homeo box 2	1	1	1	1	1	1	0	0	0	6	16	23463	0.194444	0.00520938
1449592_at	NM_009328	Tcf15	transcription factor 15	1	0	1	1	1	1	0	0	1	6	21	23385.2	0.342857	0.00519207								1	1	Homologene group 37943	5	0	1	1	0	0	0	0	0	1	0	1	0	0	0	0	0	0	1
1424721_at	BI661422	Mfap3	microfibrillar-associated protein 3	1	1	0	1	1	1	0	0	1	6	17	22835.2	0.163636	0.00521702								1	1	Homologene group 4333	5	0	1	1	0	0	0	0	0	1	0	0	0	0	0	0	1	0	1
1440520_a_at	BB117906	Slc13a5	solute carrier family 13 (sodium-dependent citrate transporter); member 5	1	0	1	1	1	1	0	0	1	6	64	22236.2	0.407937	0.00519797								1	1	Homologene group 21941	7	1	1	1	0	0	0	0	0	1	0	1	0	0	0	0	1	0	1
1460513_a_at	AK017486	Ednra	endothelin receptor type A	1	0	1	1	1	1	0	0	1	6	16	21355.4	0.277778	0.00522903								1	1	Homologene group 1478	6	0	1	1	0	0	0	0	0	1	0	1	0	0	0	0	1	0	1
1450138_a_at	NM_009254	Serpinb6a	serine (or cysteine) proteinase inhibitor; clade B; member 6a	1	0	1	1	1	1	0	0	1	6	9	20730	0.0833333	0.00522321								1	0	Homologene group 20956	4	0	1	1	0	0	0	0	0	1	0	1	0	0	0	0	0	0	1
1424842_a_at	BC025502	Arhgap24	Rho GTPase activating protein 24	1	0	1	1	1	1	0	0	1	6	16	20588.4	0.2	0.00522639								1	1	Homologene group 32754	6	0	1	1	0	0	0	0	0	1	0	1	0	0	0	0	1	0	1
1460369_at	BC003267	BC003267	cDNA sequence BC003267	1	1	0	1	1	1	0	0	1	6	9	20077.7	0.047619	0.00520284
1419403_at	NM_133214	BC017612	cDNA sequence BC017612	1	1	1	0	1	1	0	0	1	6	25	19732.6	0.133333	0.0052296								1	1	Homologene group 10607	3	0	1	1	0	0	0	0	0	1	0	0	0	0	0	0	0	0	0
1417100_at	AV336016	425O18-1	hypothetical protein 425O18-1	0	1	1	1	1	1	0	0	1	6	18	18852.5	0.327273	0.0052304
1442130_at	BG091940	Hsh2d	Hematopoietic SH2 domain containing	1	0	1	1	1	1	0	0	1	6	7	17966.5	0	0.00522597								1	1	Homologene group 13142	4	0	1	0	0	0	0	0	0	1	0	1	0	0	0	0	1	0	0
1451462_a_at	AF013486	Ifnar2	interferon (alpha and beta) receptor 2	1	0	1	1	1	1	0	0	1	6	30	17771.6	0.275	0.00522505								1	1	Homologene group 49242	4	0	1	0	0	0	0	0	0	1	0	0	0	0	0	0	1	0	1
1453149_at	AK011759	MGI:1917156	mitochondrial folate transporter/carrier	1	0	1	1	1	1	0	0	1	6	2	16748	0	0.00516242
1433834_at	BQ176049	F830029L24Rik	RIKEN cDNA F830029L24 gene	1	0	1	1	1	1	0	0	1	6	49	16680.5	0.273399	0.0052207
1443499_at	BB206430	A430075N02	hypothetical protein A430075N02	1	1	1	1	0	1	0	0	1	6	17	16526.4	0.254545	0.00522858
1416251_at	NM_008567	Mcm6	minichromosome maintenance deficient 6 (MIS5 homolog; S. pombe) (S. cerevisiae)	1	0	1	1	1	1	0	0	1	6	35	16461.8	0.351449	0.00519518								1	1	Homologene group 4322	17	1	1	1	1	1	1	1	0	1	1	1	1	1	1	1	1	1	1
1439023_at	C88117	Ddx55	DEAD (Asp-Glu-Ala-Asp) box polypeptide 55	1	1	1	1	1	1	0	0	0	6	32	16055.7	0.144928	0.00522058								1	1	Homologene group 12196	15	0	1	0	1	1	1	1	0	1	1	1	1	1	1	1	1	1	1
1456068_at	BB409198	Nfasc	neurofascin	1	1	0	1	1	1	0	0	1	6	14	15987.2	0.197802	0.00522357								1	1	Homologene group 24945	6	0	1	1	0	0	0	0	0	1	0	1	0	0	0	0	1	0	1
1436507_at	AV241470	Irak2	interleukin-1 receptor-associated kinase 2	1	0	1	1	1	1	0	0	1	6	8	15666.6	0.0666667	0.00520342								1	1	Homologene group 1207	5	0	1	1	0	0	0	0	0	1	0	0	0	0	0	0	1	0	1
1419220_at	NM_011724	Cmya1	cardiomyopathy associated 1	1	0	1	1	1	1	0	0	1	6	9	15243.1	0.416667	0.00522137
1439677_at	BB230023	Epm2a	epilepsy; progressive myoclonic epilepsy; type 2 gene alpha	1	1	1	0	1	1	0	0	1	6	20	15208.5	0.227273	0.00523802								1	1	Homologene group 38087	5	0	0	1	0	0	0	0	0	1	0	1	0	0	0	0	1	0	1
1448038_at	AI595379	1810021B22Rik	RIKEN cDNA 1810021B22 gene	1	0	1	1	1	1	0	0	1	6	11	14862.8	0.133333	0.00521986
1446102_at	BG066577	Rbm6	RNA binding motif protein 6	1	1	1	1	0	1	0	0	1	6	15	14801.8	0.107143	0.00522188								1	0	Homologene group 31336	4	0	1	1	0	0	0	0	0	1	0	0	0	0	0	0	1	0	1
1434572_at	BB750646	D030072B18Rik	RIKEN cDNA D030072B18 gene	1	0	1	1	1	1	0	0	1	6	11	14407.7	0.142857	0.0052067
1449002_at	NM_013750	Phlda3	pleckstrin homology-like domain; family A; member 3	1	0	1	1	1	1	0	0	1	6	21	14183	0.233333	0.00523781								1	0	Homologene group 8233	3	0	0	1	0	0	0	0	0	1	0	1	0	0	0	0	1	0	0
1453937_at	AK016719	4933407G14Rik	RIKEN cDNA 4933407G14 gene	1	0	1	1	1	1	0	0	1	6	12	13897.9	0.178571	0.0052281
1423870_at	BI104583	2610208M17Rik	RIKEN cDNA 2610208M17 gene	1	1	0	1	1	1	0	0	1	6	14	13645	0.142857	0.00523151
1436601_at	BQ043107	Fbxo46	F-box protein 46	1	0	1	1	1	1	0	0	1	6	12	13490.3	0.190476	0.00515692									0	Homologene group 18467	4	0	1	1	0	0	0	0	0	1	0	1	0	0	0	0	1	0	0
1455436_at	BM114282	Diras2	DIRAS family; GTP-binding RAS-like 2	1	1	1	1	1	0	0	0	1	6	34	13478.3	0.2	0.00522276								1	1	Homologene group 56777	7	0	1	1	1	0	0	1	0	1	0	0	0	0	0	0	1	0	1
1420120_at	AU020177	Phf3	PHD finger protein 3	1	1	0	1	1	1	0	0	1	6	8	13468.6	0.1	0.00522224								1	1	Homologene group 9040	5	0	1	1	0	0	0	0	0	1	0	1	0	0	0	0	0	0	1
1445896_at	BG798172	2810433D01Rik	RIKEN cDNA 2810433D01 gene	1	0	1	1	1	1	0	0	1	6	49	13449.9	0.48046	0.00515901
1422046_at	NM_008401	Itgam	integrin alpha M	1	1	0	1	1	1	0	0	1	6	15	13441.2	0.2	0.00521658								1	0	Homologene group 526	3	0	1	1	0	0	0	0	0	1	0	0	0	0	0	0	1	0	0
1419604_at	NM_021394	Zbp1	Z-DNA binding protein 1	1	0	1	1	1	1	0	0	1	6	17	13134.4	0.25	0.00523946								1	1	Homologene group 10972	3	0	0	1	0	0	0	0	0	1	0	0	0	0	0	0	1	0	0
1453296_at	AK011270	2610002I17Rik	RIKEN cDNA 2610002I17 gene	1	1	0	1	1	1	0	0	1	6	3	12717.9	0	0.00520247
1452376_at	BE951951	6230401O10Rik	RIKEN cDNA 6230401O10 gene	1	1	1	0	1	1	0	0	1	6	8	12702	0.214286	0.00523683
1435695_a_at	AA673177	A030007L17Rik	RIKEN cDNA A030007L17 gene	1	0	1	1	1	1	0	0	1	6	16	12637.3	0.25	0.00522642									1	Homologene group 11437	9	1	1	1	1	0	0	1	0	1	0	1	0	0	0	0	1	0	1
1439181_at	AV020760	LOC381880	LOC381880	1	0	1	1	1	1	0	0	1	6	30	12540.4	0.279412	0.00523305
1416037_a_at	NM_007636	Cct2	chaperonin subunit 2 (beta)	1	0	1	1	1	1	0	0	1	6	14	12451.9	0.47619	0.00521801								1	1	Homologene group 4696	18	1	1	1	1	1	1	1	1	1	1	1	1	1	1	1	1	1	1
1436525_at	AV225391	Ap3s2	adaptor-related protein complex 3; sigma 2 subunit	1	1	1	1	1	0	0	0	1	6	5	12399.4	0	0.00522641								1	1	Homologene group 100592	9	1	1	0	1	0	0	1	0	1	0	1	0	1	0	0	1	1	0
1451000_at	BB667677	1810020E01Rik	RIKEN cDNA 1810020E01 gene	1	1	1	0	1	1	0	0	1	6	13	12285.5	0.282051	0.00524219
1425882_at	AF156890	Gdf2	growth differentiation factor 2	1	1	0	1	1	1	0	0	1	6	13	12243.4	0.194444	0.00521909								1	1	Homologene group 32299	6	0	1	1	0	0	0	0	0	1	0	1	0	0	0	0	1	0	1
1441000_at	BB076832	---	Adult male diencephalon cDNA; RIKEN full-length enriched library; clone:9330129D21 product:unclassifiable; full insert sequence	1	1	1	1	1	1	0	0	0	6	26	12186.2	0.176471	0.00522965
1458863_at	BB198972	6330415G19Rik	RIKEN cDNA 6330415G19 gene	1	1	1	1	1	0	0	0	1	6	5	12097.4	0	0.00518463
1423896_a_at	AW488376	2410016F01Rik	RIKEN cDNA 2410016F01 gene	1	1	0	1	1	1	0	0	1	6	10	11689.9	0.0888889	0.00522181
1456946_at	BE949337	4831416G18Rik	RIKEN cDNA 4831416G18 gene	1	0	1	1	1	1	0	0	1	6	5	11340.1	0.1	0.00521174
1439936_at	BE949265	---	Transcribed locus	1	0	1	1	1	1	0	0	1	6	6	11023.7	0.166667	0.00521124
1425095_at	BC002059	BC002059	cDNA sequence BC002059	1	1	1	1	1	1	0	0	0	6	8	10764.6	0.4	0.00521571								1
1447490_at	AW240647	---	Transcribed locus	1	0	1	1	1	1	0	0	1	6	13	10622.7	0.0952381	0.00522225
1454469_at	AK017393	5430434N17Rik	RIKEN cDNA 5430434N17 gene	1	0	1	1	1	1	0	0	1	6	12	10618.7	0.238095	0.00520735
1428164_at	AK004444	Nudt9	nudix (nucleoside diphosphate linked moiety X)-type motif 9	1	0	1	1	1	1	0	0	1	6	31	10511.1	0.447312	0.00517062								1	1	Homologene group 11435	9	1	1	1	1	0	0	1	0	1	0	1	0	0	0	0	1	0	1
1421632_at	NM_080466	Kcnn3	potassium intermediate/small conductance calcium-activated channel; subfamily N; member 3	1	0	1	1	1	1	0	0	1	6	9	10183.8	0.3	0.00523125								1	1	Homologene group 20516	7	1	1	1	1	0	0	1	0	1	0	1	0	0	0	0	0	0	0
1454560_at	AK015846	---	---	1	0	1	1	1	1	0	0	1	6	10	10085.2	0.2	0.0052227
1428620_at	BF584204	Ensa	endosulfine alpha	0	1	1	1	1	1	0	0	1	6	9	9818.8	0.1	0.00520356								1	1	Homologene group 37924	6	0	1	1	0	0	0	0	0	1	0	1	0	0	0	0	1	0	1
1443752_at	BB139156	---	---	1	1	1	1	1	1	0	0	0	6	14	9784.87	0.25	0.00521536
1429309_at	BF471654	C130091E20	hypothetical protein C130091E20	1	0	1	1	1	1	0	0	1	6	10	9570.28	0.466667	0.00522439
1434461_at	AV025957	2610041B18Rik	RIKEN cDNA 2610041B18 gene	1	1	0	1	1	1	0	0	1	6	20	9375.78	0.457895	0.00522612
1424324_at	BB308198	Esco1	establishment of cohesion 1 homolog 1 (S. cerevisiae)	1	0	1	1	1	1	0	0	1	6	14	9269.52	0.25	0.00515724								1	1	Homologene group 62166	5	0	1	1	0	0	0	0	0	1	0	0	0	0	0	0	1	0	1
1451856_at	BC006835	BC006835	cDNA sequence BC006835	1	0	1	1	1	1	0	0	1	6	9	9212.93	0.1	0.00522506
1436785_a_at	AV024133	1110069O07Rik	RIKEN cDNA 1110069O07 gene	1	1	0	1	1	1	0	0	1	6	13	9182.92	0.238095	0.00520113
1424273_at	BC025822	Cyp2c70	cytochrome P450; family 2; subfamily c; polypeptide 70	0	1	1	1	1	1	0	0	1	6	37	9174.9	0.195238	0.00521037									0	Homologene group 120027	0	0	0	1	0	0	0	0	0	0	0	0	0	0	0	0	0	0	0
1439300_at	BG065782	Chic1	cysteine-rich hydrophobic domain 1	1	1	0	1	1	1	0	0	1	6	10	9135.79	0.1	0.00521064								1	1	Homologene group 47543	6	1	0	1	0	0	0	0	0	1	0	1	0	0	0	0	1	0	1
1425267_a_at	BB752266	3110045G13Rik	RIKEN cDNA 3110045G13 gene	1	1	1	1	1	1	0	0	0	6	12	9135.71	0.266667	0.00522376
1431118_at	BB664131	6720427H10Rik	RIKEN cDNA 6720427H10 gene	0	1	1	1	1	1	0	0	1	6	4	8949.95	0	0.00520788
1436909_at	AW542746	B430110G05Rik	RIKEN cDNA B430110G05 gene	1	1	1	1	0	1	0	0	1	6	9	8920.91	0.166667	0.00522761
1425737_at	BC002195	1500002F19Rik	RIKEN cDNA 1500002F19 gene	1	0	1	1	1	1	0	0	1	6	27	8453.25	0.304762	0.00522914
1427162_a_at	AW146130	2310011G17Rik	RIKEN cDNA 2310011G17 gene	1	0	1	1	1	1	0	0	1	6	4	8434.71	0	0.00520217
1451049_at	AV066734	Bcap31	B-cell receptor-associated protein 31	1	0	1	1	1	1	0	0	1	6	11	8395.98	0.266667	0.00518955								1	1	Homologene group 38095	8	1	1	1	1	0	0	1	0	1	0	1	0	0	0	0	1	0	0
1422476_at	NM_023065	Ifi30	interferon gamma inducible protein 30	1	1	0	1	1	1	0	0	1	6	12	8384.86	0.321429	0.00515377								1	1	Homologene group 38171	10	1	1	1	1	0	0	1	0	1	0	1	0	1	0	0	1	0	1
1434271_at	BM124000	Gba2	glucosidase beta 2	1	1	0	1	1	1	0	0	1	6	10	8379	0.3	0.00519612								1	0	Homologene group 10859	9	1	1	1	1	0	0	1	0	1	0	1	0	1	0	0	1	1	0
1416604_at	NM_025567	Cyc1	cytochrome c-1	1	0	1	1	1	1	0	0	1	6	5	8379	0	0.00517622								1	1	Homologene group 55617	17	1	1	1	1	1	1	1	1	1	1	1	1	1	1	1	1	1	0
1430474_a_at	AK007757	Mtch2	mitochondrial carrier homolog 2 (C. elegans)	1	1	1	1	1	1	0	0	0	6	3	8379	0	0.00514959								1	1	Homologene group 8645	9	1	1	1	1	0	0	1	0	1	0	1	0	0	0	0	1	0	1
1417928_at	NM_019417	Pdlim4	PDZ and LIM domain 4	1	1	1	1	0	1	0	0	1	6	4	8378.42	0	0.00522258								1	1	Homologene group 2735	5	0	1	0	0	0	0	0	0	1	0	1	0	0	0	0	1	0	1
1428288_at	AW488885	2310051E17Rik	RIKEN cDNA 2310051E17 gene	0	1	1	1	1	0	0	1	1	6	4	8378	0	0.00519786
1419270_a_at	AF091101	Dut	deoxyuridine triphosphatase	1	0	1	1	1	1	0	0	1	6	4	8378	0	0.00511195								1	1	Homologene group 31475	15	1	1	0	1	1	1	1	0	1	0	1	1	1	1	1	1	1	1
1455465_at	BB769473	---	Adult male medulla oblongata cDNA; RIKEN full-length enriched library; clone:6330504I23 product:unknown EST; full insert sequence	1	1	1	1	1	1	0	0	0	6	9	8353.95	0.333333	0.00522247
1448788_at	AF004023	Cd200 /// 2300009N04Rik	Cd200 antigen /// RIKEN cDNA 2300009N04 gene	1	0	1	1	1	1	0	0	1	6	9	8264.56	0.4	0.0052118
1453387_at	BB095161	4833432E10Rik	RIKEN cDNA 4833432E10 gene	1	0	1	1	1	1	0	0	1	6	18	8129.88	0.175824	0.00521599
1434965_at	BG067081	D19Ertd386e	DNA segment; Chr 19; ERATO Doi 386; expressed	1	0	1	1	1	1	0	0	1	6	16	8055.1	0.177778	0.00521588								1	1	Homologene group 8707	5	0	1	1	0	0	0	0	0	1	0	1	0	0	0	0	1	0	0
1440292_at	BG070282	Cdc14b	CDC14 cell division cycle 14 homolog B (S. cerevisiae)	1	1	0	1	1	1	0	0	1	6	33	7998.56	0.347826	0.00523572									1	Homologene group 104197	6	0	1	1	0	0	0	0	0	1	0	1	0	0	0	0	1	0	1
1444640_at	AI413361	LOC433931	similar to hypothetical protein FLJ20265	1	1	1	1	1	1	0	0	0	6	11	7940.72	0.0545455	0.00523213
1422869_at	NM_008587	Mertk	c-mer proto-oncogene tyrosine kinase	1	0	1	1	1	1	0	0	1	6	5	7865.63	0.166667	0.00519949								1	1	Homologene group 4626	6	0	1	1	0	0	0	0	0	1	0	1	0	0	0	0	1	0	1
1420576_at	NM_020028	Edg4	endothelial differentiation; lysophosphatidic acid G-protein-coupled receptor 4	1	0	1	1	1	1	0	0	1	6	15	7838.82	0.138889	0.00522367
1415756_a_at	BB667523	Snapap	SNAP-associated protein	0	1	1	1	1	1	0	0	1	6	5	7761.97	0.2	0.00521518
1418109_at	NM_008179	Gspt2	G1 to phase transition 2	1	0	1	1	1	1	0	0	1	6	7	7592.23	0.166667	0.00521269								1	1	Homologene group 99786	4	0	1	1	0	0	0	0	0	1	0	0	0	0	0	0	1	0	0
1432904_at	AK014131	---	---	1	1	1	1	1	1	0	0	0	6	12	7538.16	0.222222	0.00522651
1423448_at	BE986863	Rab11b	RAB11B; member RAS oncogene family	1	0	1	1	1	1	0	0	1	6	7	7372.62	0.238095	0.00520934								1	1	Homologene group 68691	10	0	1	1	0	0	0	0	0	1	0	1	1	1	0	1	1	1	1
1415890_at	NM_011863	Papss1	3'-phosphoadenosine 5'-phosphosulfate synthase 1	1	1	0	1	1	1	0	0	1	6	6	7308.16	0.4	0.00522306								1	1	Homologene group 81740	9	0	1	0	1	0	0	1	0	1	0	1	1	1	0	0	1	0	1
1433408_a_at	AK010648	Mcm10	minichromosome maintenance deficient 10 (S. cerevisiae)	1	0	1	1	1	1	0	0	1	6	25	7293.23	0.45	0.00519147								1	1	Homologene group 41275	9	1	1	1	1	0	0	1	0	1	0	1	0	0	0	0	1	0	1
1416331_a_at	NM_008686	Nfe2l1	nuclear factor; erythroid derived 2;-like 1	1	1	1	1	1	1	0	0	0	6	6	7275.53	0.0666667	0.00522457								1	0	Homologene group 20685	5	0	1	1	0	0	0	0	0	1	0	1	0	0	0	0	1	0	1
1450621_a_at	NM_008221	Hbb-y	hemoglobin Y; beta-like embryonic chain	1	1	0	1	1	1	0	0	1	6	9	7184.8	0.3	0.00520994								1	1	Homologene group 110794	5	0	1	1	0	0	0	0	0	1	0	1	0	0	0	0	0	0	1
1416319_at	NM_134079	Adk	adenosine kinase	1	0	1	1	1	1	0	0	1	6	40	7089.25	0.376812	0.00522496								1	1	Homologene group 4891	11	1	1	1	1	0	0	1	0	1	0	1	0	1	0	0	1	1	1
1441146_at	C76358	---	---	1	0	1	1	1	1	0	0	1	6	13	6950.02	0.142857	0.00520814
1452576_at	X88902	J558	Ig anti-DNA heavy chain VDJ	1	1	0	1	1	1	0	0	1	6	6	6820.54	0.666667	0.00518939
1418125_at	BM238259	4632409L19Rik	RIKEN cDNA 4632409L19 gene	1	0	1	1	1	1	0	0	1	6	5	6700.8	0.666667	0.00517032
1440510_at	BB407702	C430002N11Rik	RIKEN cDNA C430002N11 gene	1	0	1	1	1	1	0	0	1	6	20	6653.82	0.363636	0.00521299
1428022_at	BC027556	Lcn13	lipocalin 13	1	1	1	1	0	1	0	0	1	6	11	6414.93	0.333333	0.00518192									1	Homologene group 105714	3	0	0	1	0	0	0	0	0	1	0	0	0	0	0	0	1	0	0
1419167_at	NM_009475	Prap1	proline-rich acidic protein 1	1	0	1	1	1	1	0	0	1	6	30	6383.26	0.514943	0.00514602								1	1	Homologene group 7585	4	0	1	1	0	0	0	0	0	1	0	0	0	0	0	0	1	0	0
1435017_at	AV000569	LOC217149	similar to ENSANGP00000013261	1	0	1	1	1	1	0	0	1	6	35	6375.68	0.494071	0.00517057
1425294_at	BC024587	Slamf8	SLAM family member 8	1	0	1	1	1	1	0	0	1	6	14	6351.47	0.340659	0.00523275								1	1	Homologene group 10589	3	0	0	1	0	0	0	0	0	1	0	0	0	0	0	0	1	0	0
1449227_at	NM_009890	Ch25h	cholesterol 25-hydroxylase	1	1	1	1	1	1	0	0	0	6	7	6340.84	0.4	0.00519234								1	1	Homologene group 2942	6	0	1	1	0	0	0	0	0	1	0	1	0	0	0	0	1	0	1
1425559_a_at	AB022340	Sah	SA rat hypertension-associated homolog	1	0	1	1	1	1	0	0	1	6	9	6336.02	0.333333	0.00520616
1440134_at	AI647584	Cyp4a10 /// BC013476	cytochrome P450; family 4; subfamily a; polypeptide 10 /// cDNA sequence BC013476	1	1	1	1	1	1	0	0	0	6	11	6192.56	0.285714	0.00521717
1460241_a_at	BB829192	St3gal5	ST3 beta-galactoside alpha-2;3-sialyltransferase 5	1	1	0	1	1	1	0	0	1	6	5	6186.32	0	0.0052113								1	1	Homologene group 2893	6	0	1	1	0	0	0	0	0	1	0	1	0	0	0	0	1	0	1
1458720_at	BG066985	Clstn2	Calsyntenin 2	1	1	1	1	1	0	0	0	1	6	13	5951.4	0.107143	0.00522606								1	0	Homologene group 49698	6	0	1	1	1	0	0	0	0	1	0	1	0	0	0	0	1	0	1
1459925_at	BG079457	Lman2l	Lectin; mannose-binding 2-like	1	0	1	1	1	1	0	0	1	6	9	5903.73	0.2	0.00520823								1	1	Homologene group 57125	5	0	1	1	0	0	0	0	0	1	0	1	0	0	0	0	1	0	0
1428075_at	BG968046	Ndufb4	NADH dehydrogenase (ubiquinone) 1 beta subcomplex 4	1	1	1	1	1	1	0	0	0	6	12	5901.69	0.285714	0.00522909								1
1422636_at	NM_011806	Dmtf1	cyclin D binding myb-like transcription factor 1	1	1	1	1	1	1	0	0	0	6	4	5896.58	0	0.00522308								1	1	Homologene group 8017	6	0	1	1	0	0	0	0	0	1	0	1	0	0	0	0	1	0	1
1426924_at	AA709668	Mnab	membrane associated DNA binding protein	1	0	1	1	1	1	0	0	1	6	12	5813.94	0.272727	0.00522565
1430446_at	AI462873	2310057B04Rik	RIKEN cDNA 2310057B04 gene	1	0	1	1	1	1	0	0	1	6	4	5755.56	0	0.00520417
1425079_at	BC024498	Tm6sf2	transmembrane 6 superfamily member 2	1	1	1	1	1	1	0	0	0	6	8	5662.02	0.321429	0.00520012								1	1	Homologene group 77694	4	0	1	1	0	0	0	0	0	1	0	0	0	0	0	0	1	0	0
1440899_at	BB141577	---	---	1	1	1	1	1	1	0	0	0	6	5	5359.14	0	0.00518088
1437443_at	BB546492	Pxmp3	Peroxisomal membrane protein 3	0	1	1	1	1	1	0	0	1	6	6	5336.27	0	0.00522536
1449020_at	NM_023564	Plscr3	phospholipid scramblase 3	1	0	1	1	1	1	0	0	1	6	3	5332.65	0.333333	0.00520331								1	1	Homologene group 23219	4	0	1	1	0	0	0	0	0	1	0	0	0	0	0	0	1	0	0
1415830_at	NM_011959	Orc5l	origin recognition complex; subunit 5-like (S. cerevisiae)	1	0	1	1	1	1	0	0	1	6	15	5255.39	0.4	0.00518182								1	1	Homologene group 37636	13	0	1	1	1	0	1	1	0	1	1	1	0	1	1	0	1	1	1
1438493_at	AW554531	4933433K01Rik	RIKEN cDNA 4933433K01 gene	1	1	0	1	1	1	0	0	1	6	4	5209.79	0	0.00521073
1423613_at	BB033597	---	---	1	1	1	1	1	1	0	0	0	6	13	5202.68	0.269231	0.00522696
1442285_at	AW551808	Syne2	synaptic nuclear envelope 2	1	1	1	1	1	1	0	0	0	6	8	5088.49	0.428571	0.00521057								1	0	Homologene group 56700	3	0	1	1	0	0	0	0	0	1	0	0	0	0	0	0	1	0	0
1424420_at	BC006717	Ccpg1	cell cycle progression 1	1	1	0	1	1	1	0	0	1	6	7	5060.76	0.2	0.00520861								1	1	Homologene group 3487	6	0	1	1	0	0	0	0	0	1	0	1	0	0	0	0	1	0	1
1424553_at	BC024464	1110011D13Rik	RIKEN cDNA 1110011D13 gene	1	1	1	1	0	1	0	0	1	6	22	5009.01	0.32381	0.00521652
1426648_at	BG918951	Mapkapk2	MAP kinase-activated protein kinase 2	1	0	1	1	0	1	0	1	1	6	5	4845.81	0	0.00519443								1	1	Homologene group 56412	6	0	1	1	0	0	0	0	0	1	0	1	0	0	0	0	1	0	1
1418529_at	NM_133676	Osgep	O-sialoglycoprotein endopeptidase	1	1	0	1	1	1	0	0	1	6	5	4698.84	0.3	0.00522389								1	1	Homologene group 6395	16	1	0	1	1	1	1	1	1	1	1	1	1	1	1	1	1	1	0
1455748_at	AI662241	5930418K15Rik	RIKEN cDNA 5930418K15 gene	1	1	1	0	1	1	0	0	1	6	3	4690.01	0	0.0051896
1433618_at	BB397899	C330006A16Rik	RIKEN cDNA C330006A16 gene	1	0	1	1	1	1	0	0	1	6	10	4529.09	0.4	0.00517456								1	1	Homologene group 66992	2	0	0	1	0	0	0	0	0	0	0	1	0	0	0	0	0	0	0
1428562_at	AK008813	2210403K04Rik	RIKEN cDNA 2210403K04 gene	1	1	0	1	1	1	0	0	1	6	16	4489.33	0.4	0.00521116
1426767_at	AK014328	3230401M21Rik	RIKEN cDNA 3230401M21 gene	1	1	0	1	1	1	0	0	1	6	3	4413.46	0	0.00518929
1429662_at	AK015003	Spata1	spermatogenesis associated 1	1	0	1	1	1	1	0	0	1	6	4	4405.91	0.166667	0.00519364								1	1	Homologene group 23356	4	0	1	1	0	0	0	0	0	1	0	0	0	0	0	0	0	0	1
1435991_at	BQ174990	---	Transcribed locus	1	1	0	1	1	1	0	0	1	6	6	4324.21	0.333333	0.00521755
1456384_at	BB308872	Nlgn3	neuroligin 3	1	0	1	1	1	1	0	0	1	6	13	4319.05	0.464286	0.00518129								1	1	Homologene group 23133	8	0	1	1	1	0	0	0	0	1	1	1	0	0	1	0	1	0	0
1425066_a_at	BC018294	1110061O04Rik	RIKEN cDNA 1110061O04 gene	1	1	1	1	1	0	0	0	1	6	16	4293.29	0.441667	0.00521709
1452256_at	AK003325	1110002N22Rik	RIKEN cDNA 1110002N22 gene	1	0	1	1	1	1	0	0	1	6	4	4256.4	0	0.00518248								1	1	Homologene group 11657	5	0	1	1	0	0	0	0	0	1	0	1	0	0	0	0	1	0	0
1449354_at	NM_011663	U2af1-rs1	U2 small nuclear ribonucleoprotein auxiliary factor (U2AF) 1; related sequence 1	1	1	0	1	1	1	0	0	1	6	5	4207.39	0.2	0.00521187
1425815_a_at	BC021427	Hmmr	hyaluronan mediated motility receptor (RHAMM)	1	0	1	1	1	1	0	0	1	6	9	4207.34	0.142857	0.00520684								1	1	Homologene group 8271	6	0	1	1	0	0	0	0	0	1	0	1	0	0	0	0	1	0	1
1428762_at	AU067719	4921526G09Rik	RIKEN cDNA 4921526G09 gene	1	1	0	1	1	1	0	0	1	6	6	4190.08	0.333333	0.00520574
1457278_at	BB076796	6720489N17Rik	RIKEN cDNA 6720489N17 gene	1	0	1	1	1	1	0	0	1	6	5	4190	0.333333	0.00514488
1416755_at	AK002290	Dnajb1	DnaJ (Hsp40) homolog; subfamily B; member 1	1	0	0	1	1	1	0	1	1	6	4	4190	0	0.00517424								1	1	Homologene group 55957	14	1	1	1	0	1	1	0	0	1	1	1	1	1	1	1	1	1	0
1445990_at	BG069640	---	---	1	1	0	1	1	1	0	0	1	6	4	4190	0	0.00518073
1451588_at	BC014724	1810022C23Rik	RIKEN cDNA 1810022C23 gene	0	1	1	1	1	1	0	0	1	6	4	4190	0	0.00518354									0	Homologene group 74357	6	0	0	1	1	1	0	1	0	0	1	0	0	0	1	1	0	0	0
1453841_at	BG061080	2310050P20Rik	RIKEN cDNA 2310050P20 gene	1	1	0	1	1	1	0	0	1	6	3	4190	0	0.00517213
1435801_at	AV365405	Fcmd	Fukuyama type congenital muscular dystrophy homolog (human)	1	1	0	1	1	1	0	0	1	6	3	4190	0	0.00514215
1455167_at	AA144594	Cox8c	cytochrome c oxidase; subunit VIIIc	1	0	1	1	1	1	0	0	1	6	3	4190	0	0.0051494								1	0	Homologene group 83496	0	0	0	1	0	0	0	0	0	0	0	0	0	0	0	0	0	0	0
1416865_at	BC011462	Fgd1	FYVE; RhoGEF and PH domain containing 1	1	1	1	1	0	1	0	0	1	6	3	4190	0	0.0052112								1	0	Homologene group 3282	3	0	1	1	0	0	0	0	0	1	0	1	0	0	0	0	0	0	0
1450524_at	NM_020293	Cldn9	claudin 9	1	0	1	1	1	1	0	0	1	6	2	4190	0	0.0051599								1	1	Homologene group 10656	4	0	1	1	0	0	0	0	0	1	0	1	0	0	0	0	0	0	0
1422572_at	NM_019566	Rhog	ras homolog gene family; member G	1	0	1	1	1	1	0	0	1	6	2	4190	0	0.00517678								1	1	Homologene group 68196	4	0	1	1	0	0	0	0	0	1	0	1	0	0	0	0	0	0	0
1438298_a_at	AI326328	---	---	1	0	1	1	1	1	0	0	1	6	2	4190	0	0.00517641
1453313_at	AK017464	Sesn3	sestrin 3	1	0	1	1	1	1	0	0	1	6	2	4190	0	0.00520458								1	1	Homologene group 14386	8	1	1	1	1	0	0	1	0	1	0	1	0	0	0	0	0	0	1
1430926_at	AK017232	Ttc18	tetratricopeptide repeat domain 18	1	0	1	1	1	1	0	0	1	6	2	4190	0	0.00516086								1	1	Homologene group 17048	6	0	1	1	0	0	0	0	0	1	0	1	0	0	0	0	1	0	1
1427214_at	AK017155	Agmat	agmatine ureohydrolase (agmatinase)	1	1	0	1	1	1	0	0	1	6	7	4156.93	0.3	0.00520861								1	1	Homologene group 99855	12	0	1	1	0	1	1	0	0	1	1	1	0	1	1	0	1	1	1
1436068_at	BG068032	Zbtb10	zinc finger and BTB domain containing 10	1	1	1	1	1	1	0	0	0	6	4	4152.15	0	0.00521449								1	1	Homologene group 11395	5	0	1	1	0	0	0	0	0	1	0	1	0	0	0	0	1	0	0
1450682_at	NM_008375	---	---	1	0	1	1	1	1	0	0	1	6	6	4135.19	0.333333	0.0052223
1445240_at	BG069568	---	---	1	0	1	1	1	1	0	0	1	6	45	3987.43	0.425806	0.00522283
1417080_a_at	NM_012029	MGI:1349469	signaling intermediate in Toll pathway-evolutionarily conserved	1	1	0	1	1	1	0	0	1	6	35	3910.99	0.605263	0.00514567
1435018_at	BB200314	5930434B04Rik	RIKEN cDNA 5930434B04 gene	1	1	0	1	1	1	0	0	1	6	16	3849.03	0.388889	0.00522675								1	1	Homologene group 41182	6	0	1	1	0	0	0	0	0	1	0	1	0	0	0	0	1	0	1
1448861_at	NM_011633	Traf5	Tnf receptor-associated factor 5	1	1	0	1	1	1	0	0	1	6	2	3555.78	0	0.00521704								1	1	Homologene group 27079	5	1	1	0	0	0	0	0	0	1	0	0	0	0	0	0	1	0	1
1415742_at	BC016485	Aup1	ancient ubiquitous protein	1	0	1	1	1	1	0	0	1	6	40	3474.1	0.547101	0.00514595								1	1	Homologene group 7239	7	1	1	1	0	0	0	0	0	1	0	1	0	0	0	0	1	0	1
1422515_at	NM_020264	---	---	1	0	1	1	1	1	0	0	1	6	12	3383.45	0.30303	0.00522518
1419241_a_at	NM_009646	Aire	autoimmune regulator (autoimmune polyendocrinopathy candidiasis ectodermal dystrophy)	1	0	1	1	1	1	0	0	1	6	12	3355.25	0.285714	0.00520175								1	1	Homologene group 327	6	0	1	1	0	0	0	0	0	1	0	1	0	0	0	0	1	0	1
1416951_a_at	NM_023721	Atp6v1d	ATPase; H+ transporting; V1 subunit D	1	0	0	1	1	1	0	1	1	6	4	3339.35	0.333333	0.00517412								1	0	Homologene group 5783	16	1	1	1	1	1	1	1	0	1	1	1	1	1	1	1	1	1	1
1423294_at	AW555393	Mest	mesoderm specific transcript	1	0	1	1	1	1	0	0	1	6	3	3254.63	0	0.00518811								1	1	Homologene group 1800	6	0	1	1	0	0	0	0	0	1	0	1	0	0	0	0	1	0	1
1456019_at	AV370154	Cwf19l2	CWF19-like 2; cell cycle control (S. pombe)	1	1	0	1	1	1	0	0	1	6	16	3249.03	0.361111	0.00520687								1	1	Homologene group 12366	11	1	1	1	1	0	0	1	0	1	0	1	0	1	0	0	1	1	1
1455442_at	BM119683	Slc6a19	solute carrier family 6 (neurotransmitter transporter); member 19	1	1	1	1	1	1	0	0	0	6	4	3046.82	0.166667	0.00520038								1	0	Homologene group 52819	3	0	0	1	0	0	0	0	0	1	0	1	0	0	0	0	0	0	1
1419872_at	AI323359	---	---	1	1	1	1	0	1	0	0	1	6	66	3046.37	0.377868	0.00523111
1419366_at	NM_026015	2610510L01Rik	RIKEN cDNA 2610510L01 gene	1	1	1	1	1	1	0	0	0	6	6	2937.03	0.333333	0.00522159
1423717_at	BC019174	Ak3l1	adenylate kinase 3 alpha-like 1	1	1	0	1	1	1	0	0	1	6	12	2933.19	0.428571	0.00521319								1
1419748_at	NM_011994	Abcd2	ATP-binding cassette; sub-family D (ALD); member 2	1	0	1	1	1	1	0	0	1	6	5	2852.63	0.333333	0.0052031								1	0	Homologene group 55873	7	1	1	1	1	0	0	1	0	1	0	0	0	0	0	0	1	0	1
1424532_at	AB033168	Ylpm1	YLP motif containing 1	1	1	0	1	1	1	0	0	1	6	6	2791.12	0.2	0.00521946								1	0	Homologene group 100073	0	0	0	1	0	0	0	0	0	0	0	0	0	0	0	0	0	0	0
1450198_at	NM_013849	Dusp13	dual specificity phosphatase 13	1	1	1	1	0	1	0	0	1	6	11	2737.66	0.285714	0.00522533								1	1	Homologene group 8476	6	0	1	1	0	0	0	0	0	1	0	1	0	0	0	0	1	0	1
1444299_at	BB209605	A430093F15Rik	RIKEN cDNA A430093F15 gene	1	1	1	1	1	1	0	0	0	6	4	2625.13	0	0.00516951
1435569_at	BB500602	D630029K05Rik	RIKEN cDNA D630029K05 gene	1	0	1	1	1	1	0	0	1	6	25	2595.25	0.410256	0.00520646
1452664_a_at	AK010720	Tm7sf3	transmembrane 7 superfamily member 3	0	1	1	1	1	1	0	0	1	6	10	2541.55	0.4	0.00521625								1	1	Homologene group 9560	6	0	1	1	0	0	0	0	0	1	0	1	0	0	0	0	1	0	1
1428961_a_at	AK003261	Sfrs16	splicing factor; arginine/serine-rich 16 (suppressor-of-white-apricot homolog; Drosophila)	1	0	1	1	1	1	0	0	1	6	5	2504.07	0	0.00520683								1	1	Homologene group 21391	8	1	1	1	0	0	0	0	0	1	0	1	0	1	0	0	1	1	0
1451040_at	AI451865	Hars2	histidyl tRNA synthetase 2	1	0	1	1	1	1	0	0	1	6	23	2377.25	0.363636	0.00515698								1	1	Homologene group 40819	5	0	1	0	0	0	0	0	1	1	0	0	0	0	0	0	1	0	1
1426641_at	BB354684	Trib2	tribbles homolog 2 (Drosophila)	1	1	1	1	1	1	0	0	0	6	4	2255.25	0.5	0.00519965								1	1	Homologene group 41445	6	0	1	1	0	0	0	0	0	1	0	1	0	0	0	0	1	0	1
1432300_at	AK004471	1190003K10Rik	RIKEN cDNA 1190003K10 gene	1	1	1	1	1	1	0	0	0	6	12	2250.67	0.214286	0.0052077
1419591_at	NM_031378	Mlze	melanoma-derived leucine zipper; extra-nuclear factor	1	1	1	0	1	1	0	0	1	6	3	2097.72	0	0.00521821
1452041_at	BB376289	C630013N10Rik	RIKEN cDNA C630013N10 gene	1	1	1	0	1	1	0	0	1	6	16	2010.33	0.333333	0.00520792
1433467_at	BB547620	Slc7a6	solute carrier family 7 (cationic amino acid transporter; y+ system); member 6	1	1	1	1	0	1	0	0	1	6	6	1990.67	0.0666667	0.00522444								1	0	Homologene group 62496	7	0	1	1	0	0	0	0	0	1	1	1	0	0	1	0	1	0	1
1427327_at	BB775785	Pilra	paired immunoglobin-like type 2 receptor alpha	1	1	1	1	1	1	0	0	0	6	5	1927.23	0.3	0.00520865								1	1	Homologene group 8387	4	0	1	1	0	0	0	0	0	1	0	0	0	0	0	0	1	0	0
1424682_at	BC003341	D5Ertd708e	DNA segment; Chr 5; ERATO Doi 708; expressed	1	0	1	1	1	1	0	0	1	6	6	1762.67	0	0.00520301
1456483_at	BB008902	Zfp9	zinc finger protein 9	1	0	1	1	1	1	0	0	1	6	7	1754.93	0.285714	0.00522381								1	0	Homologene group 49280	2	0	1	0	0	0	0	0	0	1	0	0	0	0	0	0	1	0	0
1431429_a_at	AK006286	Arl4	ADP-ribosylation factor-like 4	1	0	0	1	1	1	0	1	1	6	3	1713.63	0	0.00517829
1430511_at	AK005367	1500037O19Rik	RIKEN cDNA 1500037O19 gene	1	0	1	1	1	1	0	0	1	6	8	1679.4	0.3	0.00521285
1440904_at	BB189556	Senp5	SUMO/sentrin specific protease 5	1	1	1	1	1	1	0	0	0	6	7	1636.77	0.285714	0.00521353								1	0	Homologene group 17647	4	0	1	0	0	0	0	0	0	1	0	1	0	0	0	0	1	0	1
1457779_at	AV013305	1110046J04Rik	RIKEN cDNA 1110046J04 gene	1	1	1	1	1	0	0	0	1	6	46	1578.47	0.501538	0.0052029
1448835_at	NM_033270	E2f6	E2F transcription factor 6	1	0	1	1	1	1	0	0	1	6	25	1568.23	0.428571	0.00517026								1	1	Homologene group 1473	5	0	1	1	0	0	0	0	0	1	0	1	0	0	0	0	1	0	0
1449761_at	AA589418	---	---	1	1	1	1	0	1	0	0	1	6	8	1540.24	0.166667	0.00520849
1422018_at	NM_010437	Hivep2	human immunodeficiency virus type I enhancer binding protein 2	1	0	1	1	1	1	0	0	1	6	34	1507.11	0.363158	0.0052208								1	1	Homologene group 4900	6	0	1	1	0	0	0	0	0	1	0	1	0	0	0	0	1	0	1
1423697_at	BC006869	2400006A19Rik	RIKEN cDNA 2400006A19 gene	1	0	1	1	1	1	0	0	1	6	2	1469.41	0	0.0052107
1442076_at	AI415085	Cobl	cordon-bleu	1	1	1	1	1	1	0	0	0	6	4	1466.34	0	0.00519502								1	0	Homologene group 9058	4	0	1	1	0	0	0	0	0	1	0	0	0	0	0	0	1	0	1
1418164_at	NM_007941	Epim	epimorphin	0	1	1	1	1	1	0	0	1	6	3	1402.48	0	0.00520771
1438892_at	BB088198	Qk	Quaking	1	1	0	1	1	1	0	0	1	6	31	1371.22	0.535948	0.00512117									1	Homologene group 11059	6	1	1	1	0	0	0	0	0	1	0	1	0	0	0	0	0	0	1
1430421_a_at	AK003909	BC010787	cDNA sequence BC010787	1	1	0	1	1	1	0	0	1	6	8	1355.21	0.4	0.00520933
1450431_a_at	NM_010890	---	---	1	1	0	1	1	1	0	0	1	6	3	1282.37	0	0.00520178
1450986_at	BB729616	Nol5	nucleolar protein 5	1	0	1	1	1	1	0	0	1	6	7	1244.66	0.333333	0.0052115								1	1	Homologene group 7024	17	1	1	1	1	1	1	1	0	1	1	1	1	1	1	1	1	1	1
1431515_at	AV254510	4932414N04Rik	RIKEN cDNA 4932414N04 gene	1	0	1	1	1	1	0	0	1	6	3	1209.69	0	0.00519646
1443635_at	BF319756	Gm128	gene model 128; (NCBI)	0	1	1	1	1	1	0	0	1	6	3	1080.79	0	0.00520361								1	1	Homologene group 9885	4	0	1	1	0	0	0	0	0	1	0	0	0	0	0	0	1	0	0
1418857_at	BC013493	Slc13a2	solute carrier family 13 (sodium-dependent dicarboxylate transporter); member 2	1	1	0	1	1	1	0	0	1	6	4	1064.28	0.333333	0.00519679								1	1	Homologene group 2965	10	0	1	1	1	0	0	1	0	1	0	1	0	1	0	0	1	1	1
1419671_a_at	NM_134159	Il17rc	interleukin 17 receptor C	1	0	1	1	1	1	0	0	1	6	11	1033.53	0.666667	0.00520532								1	0	Homologene group 15894	3	0	1	1	0	0	0	0	0	1	0	0	0	0	0	0	1	0	0
1425915_at	BC027076	Slc26a8	solute carrier family 26; member 8	0	1	1	1	1	1	0	0	1	6	2	1019.71	0	0.00516884								1	1	Homologene group 27095	5	0	1	1	0	0	0	0	0	1	0	0	0	0	0	0	1	0	1
1452454_at	BB660702	Sdad1	SDA1 domain containing 1	1	0	1	1	1	1	0	0	1	6	3	991.397	0	0.00521024								1	0	Homologene group 6036	16	1	1	1	1	1	1	1	0	1	1	1	1	1	1	1	1	1	1
1443734_at	BE335271	---	---	1	0	1	1	1	1	0	0	1	6	6	967.071	0.333333	0.00515068
1433052_at	AK014085	---	---	1	1	1	1	1	1	0	0	0	6	12	962.286	0.464286	0.00520095
1449404_at	AK012196	Pip5k2a	phosphatidylinositol-4-phosphate 5-kinase; type II; alpha	1	1	1	0	1	1	0	0	1	6	7	958.066	0.47619	0.00523195
1426366_at	AW553784	Eif2c2	eukaryotic translation initiation factor 2C; 2	1	0	1	1	0	1	0	1	1	6	8	913.794	0.2	0.00519571								1	1	Homologene group 81825	10	1	1	1	1	0	0	1	0	1	0	1	0	1	0	0	1	1	0
1457672_at	AV050650	Chd9	chromodomain helicase DNA binding protein 9	1	1	0	1	1	1	0	0	1	6	29	875.717	0.411765	0.00517028								1	1	Homologene group 11844	5	0	1	0	0	0	0	0	0	1	0	1	0	0	0	0	1	0	1
1429237_at	BF682137	Stx16	syntaxin 16	1	0	1	1	1	1	0	0	1	6	2	853.195	0	0.0051898									1	Homologene group 2791	16	1	1	1	1	1	1	1	0	1	1	1	1	1	1	1	1	0	1
1435772_at	AV122249	Kif21b	kinesin family member 21B	1	0	1	1	1	1	0	0	1	6	48	811.977	0.568966	0.00514597								1	0	Homologene group 56868	4	0	1	1	0	0	0	0	0	1	0	1	0	0	0	0	0	0	1
1435088_at	BM945177	Nsd1	Nuclear receptor-binding SET-domain protein 1	1	1	1	1	1	1	0	0	0	6	14	810.983	0.681319	0.00519826								1	1	Homologene group 32543	6	0	1	1	0	0	0	0	0	1	0	1	0	0	0	0	1	0	1
1420991_at	AK009959	Ankrd1	ankyrin repeat domain 1 (cardiac muscle)	1	0	1	1	1	1	0	0	1	6	8	775.56	0.5	0.00522493								1	1	Homologene group 8289	6	0	1	1	0	0	0	0	0	1	0	1	0	0	0	0	1	0	1
1420933_a_at	AI746570	Eya3	eyes absent 3 homolog (Drosophila)	1	1	0	1	1	1	0	0	1	6	3	773.834	0	0.00518084								1	0	Homologene group 1508	5	0	1	1	0	0	0	0	0	1	0	1	0	0	0	0	1	0	1
1433439_at	BG071103	Cpne1	copine I	0	1	1	1	1	1	0	0	1	6	3	768.048	0	0.00519618								1	1	Homologene group 36501	4	0	1	0	0	0	0	0	0	1	0	1	0	0	0	0	1	0	0
1436867_at	BG795043	Srl	sarcalumenin	1	0	1	1	1	1	0	0	1	6	8	688.811	0.25	0.00520361								1	1	Homologene group 45500	7	0	1	1	1	0	0	1	0	1	0	1	0	0	0	0	1	0	0
1457323_at	AI846508	C030030A07Rik	RIKEN cDNA C030030A07 gene	1	0	1	1	1	1	0	0	1	6	5	662.644	0	0.00520451									1	Homologene group 79087	5	0	1	1	0	0	0	0	0	1	0	0	0	0	0	0	1	0	1
1431277_at	BG078690	---	---	1	1	0	1	1	1	0	0	1	6	2	643.512	0	0.00518626
1436984_at	BG261647	Abi2	abl-interactor 2	1	1	1	1	0	1	0	0	1	6	3	636.541	0	0.00518443								1	0	Homologene group 4209	7	1	0	1	1	0	0	1	0	1	0	1	0	0	0	0	1	0	1
1452584_at	BG915677	1500032L24Rik	RIKEN cDNA 1500032L24 gene	1	1	1	1	1	1	0	0	0	6	7	581.78	0.5	0.00520301								1	1	Homologene group 14110	5	0	1	1	0	0	0	0	0	1	0	0	0	0	0	0	1	0	1
1428405_at	BF580567	Hcfc1r1	host cell factor C1 regulator 1 (XPO1-dependent)	1	1	1	1	1	0	0	0	1	6	6	575.548	0	0.00521648								1	1	Homologene group 9901	3	0	1	1	0	0	0	0	0	1	0	0	0	0	0	0	0	0	0
1450953_at	AK004129	Wdr39	WD repeat domain 39	1	0	1	1	1	1	0	0	1	6	6	558.153	0.333333	0.00521546
1439399_a_at	BB493265	Rnu22	RNA; U22 small nucleolar	1	1	1	1	0	1	0	0	1	6	3	521.036	0	0.00521099
1417926_at	NM_133762	5830426I05Rik	RIKEN cDNA 5830426I05 gene	1	0	0	1	1	1	0	1	1	6	9	513.46	0.416667	0.00514594
1452308_a_at	BB462665	Atp1a2	ATPase; Na+/K+ transporting; alpha 2 polypeptide	0	1	1	1	1	1	0	0	1	6	6	506.149	0.333333	0.00519074								1	1	Homologene group 47947	5	0	1	1	0	0	0	0	0	1	0	1	0	0	0	0	1	0	0
1434087_at	BG069750	Mthfr	5;10-methylenetetrahydrofolate reductase	1	1	0	1	1	1	0	0	1	6	14	493.993	0.340659	0.00521781								1	1	Homologene group 4349	15	1	1	1	0	1	1	0	0	1	1	1	1	1	1	1	1	1	1
1452579_at	AK009021	Nifun	NifU-like N-terminal domain containing	1	0	1	1	1	1	0	0	1	6	37	490.054	0.735931	0.00517813
1454709_at	BG075363	9630015D15Rik	RIKEN cDNA 9630015D15 gene	1	1	0	1	1	1	0	0	1	6	4	482.119	0.333333	0.00520246
1425413_at	BC017598	Rfx3	regulatory factor X; 3 (influences HLA class II expression)	1	1	0	1	1	1	0	0	1	6	3	474.737	0	0.00520936								1	1	Homologene group 7917	6	0	1	0	1	0	0	1	0	1	0	1	0	0	0	0	1	0	0
1453353_at	AK006712	1700047I16Rik	RIKEN cDNA 1700047I16 gene	1	0	1	1	1	1	0	0	1	6	11	446.267	0.357143	0.00520535
1418187_at	AF146523	Ramp2	receptor (calcitonin) activity modifying protein 2	1	1	1	1	1	1	0	0	0	6	4	445.059	0.333333	0.00519767								1	1	Homologene group 4274	5	0	1	1	0	0	0	0	0	1	0	0	0	0	0	0	1	0	1
1417396_at	AF290209	Podxl	podocalyxin-like	1	1	1	1	0	1	0	0	1	6	10	441.939	0.577778	0.0052141								1	1	Homologene group 3937	6	0	1	1	0	0	0	0	0	1	0	1	0	0	0	0	1	0	1
1446341_at	AV319059	6030403N03Rik	RIKEN cDNA 6030403N03 gene	1	0	1	1	1	1	0	0	1	6	37	438.504	0.680952	0.00520035
1460034_at	BG063745	BC042901	cDNA sequence BC042901	1	1	1	1	1	1	0	0	0	6	4	419.675	0.166667	0.00518306
1455155_at	BB174540	BC040823	cDNA sequence BC040823	1	0	1	1	1	1	0	0	1	6	3	413.889	0	0.00518463
1420758_at	NM_029082	5830411J07Rik	RIKEN cDNA 5830411J07 gene	1	1	1	1	1	1	0	0	0	6	16	407.478	0.422222	0.00521666
1448650_a_at	NM_011132	Pole	polymerase (DNA directed); epsilon	1	0	1	1	1	1	0	0	1	6	9	407.363	0.472222	0.00517012								1	0	Homologene group 4539	16	1	1	1	1	1	1	1	0	1	1	1	1	1	1	1	1	1	1
1456993_at	BB390674	Cugbp1	CUG triplet repeat; RNA binding protein 1	1	1	0	1	1	1	0	0	1	6	42	375.881	0.663333	0.00514583								1	1	Homologene group 23002	7	1	1	1	1	0	0	0	0	1	0	1	0	0	0	0	0	0	1
1437651_a_at	AW537479	Dtnb	dystrobrevin; beta	1	1	0	1	1	1	0	0	1	6	4	327.647	0	0.00520201								1	1	Homologene group 74875	7	0	1	1	1	0	0	1	0	1	0	1	0	0	0	0	1	0	0
1419633_at	NM_013702	Uncx4.1	Unc4.1 homeobox (C. elegans)	1	0	1	1	1	1	0	0	1	6	8	319.444	0.5	0.0051699
1422442_at	NM_021535	Smu1	smu-1 suppressor of mec-8 and unc-52 homolog (C. elegans)	1	1	1	1	1	1	0	0	0	6	6	295.062	0.466667	0.00522352								1	1	Homologene group 10079	11	1	1	1	1	0	0	1	0	1	0	1	0	1	0	0	1	1	1
1448546_at	BB703307	Rassf3	Ras association (RalGDS/AF-6) domain family 3	1	1	1	1	1	1	0	0	0	6	3	294.732	0	0.00520266								1	1	Homologene group 16365	5	0	1	1	0	0	0	0	0	1	0	1	0	0	0	0	0	0	1
1422401_at	NM_011478	Sprr3	small proline-rich protein 3	1	1	1	1	1	1	0	0	0	6	3	285.731	0	0.00521147								1	0	Homologene group 105705	0	0	0	1	0	0	0	0	0	0	0	0	0	0	0	0	0	0	0
1417322_at	NM_133964	1110033C18Rik	RIKEN cDNA 1110033C18 gene	1	0	1	1	1	1	0	0	1	6	3	282.682	0	0.0052102
1455731_at	BI158381	Slc29a3	solute carrier family 29 (nucleoside transporters); member 3	1	0	1	1	1	1	0	0	1	6	4	278.418	0.666667	0.00520111								1	1	Homologene group 56805	7	1	1	1	0	0	0	0	0	1	0	1	0	0	0	0	1	0	1
1422788_at	NM_021398	Slc43a3	solute carrier family 43; member 3	1	0	1	1	1	1	0	0	1	6	7	268.373	0.428571	0.00521099								1	1	Homologene group 40925	8	0	1	1	0	1	0	0	0	1	0	1	0	0	0	1	1	0	1
1424612_at	BC016107	9330161F08Rik	RIKEN cDNA 9330161F08 gene	1	1	1	1	1	1	0	0	0	6	6	248.312	0.266667	0.00519798
1457082_at	BM508445	Ppp1r3f	Protein phosphatase 1; regulatory (inhibitor) subunit 3F	1	0	1	1	1	1	0	0	1	6	11	247.759	0.333333	0.00521106								1	1	Homologene group 16330	3	0	1	0	0	0	0	0	0	1	0	0	0	0	0	0	1	0	0
1425069_at	BC018285	BC018285	cDNA sequence BC018285	1	0	1	1	1	1	0	0	1	6	14	245.307	0.611111	0.00520303
1429912_at	AK006225	Spag4l	sperm associated antigen 4-like	1	0	1	1	1	1	0	0	1	6	3	239.634	0	0.00519515								1	1	Homologene group 12640	3	0	0	1	0	0	0	0	0	1	0	0	0	0	0	0	1	0	0
1415786_at	NM_025973	Pgc	progastricsin (pepsinogen C)	1	1	1	1	1	1	0	0	0	6	2	223.514	0	0.00520392								1	1	Homologene group 55669	5	0	0	1	0	0	0	0	0	1	0	0	1	0	0	0	1	0	1
1428068_at	AK003990	1110030L07Rik	RIKEN cDNA 1110030L07 gene	1	1	1	1	0	1	0	0	1	6	9	219.623	0.527778	0.00521427
1422400_a_at	NM_010416	Hemt1	hematopoietic cell transcript 1	1	0	1	1	1	1	0	0	1	6	12	205.268	0.47619	0.00515803
1417303_at	NM_138656	Mvd	mevalonate (diphospho) decarboxylase	1	1	1	1	1	1	0	0	0	6	10	198.51	0.711111	0.005193								1	1	Homologene group 1843	16	0	1	1	1	1	1	1	0	1	1	1	1	1	1	1	1	1	1
1436303_at	BQ267038	5033403D15Rik	RIKEN cDNA 5033403D15 gene	1	0	1	1	1	1	0	0	1	6	10	187.906	0.333333	0.00520819
1425561_at	BM225164	Trnt1	tRNA nucleotidyl transferase; CCA-adding; 1	1	1	1	1	1	0	0	0	1	6	5	156.788	0.2	0.00519712								1	1	Homologene group 9333	8	1	1	1	1	0	0	1	0	1	0	1	0	0	0	0	1	0	0
1449085_at	NM_024250	Phf10	PHD finger protein 10	1	1	1	1	0	1	0	0	1	6	3	136.341	0.333333	0.00521588								1	1	Homologene group 10112	8	1	1	1	1	0	0	1	0	1	0	1	0	0	0	0	1	0	0
1423680_at	BC026831	Fads1	fatty acid desaturase 1	1	1	1	1	1	1	0	0	0	6	8	129.772	0.5	0.00519735								1	1	Homologene group 22753	5	0	1	1	0	0	0	0	0	1	0	0	0	0	0	0	1	0	1
1426983_at	BM244005	Fnbp1	Formin binding protein 1	1	0	1	1	1	1	0	0	1	6	7	107.358	0.4	0.00520068								1	1	Homologene group 100983	6	0	1	1	0	0	0	0	0	1	0	1	0	0	0	0	1	0	1
1429978_at	BB238321	5830467E07Rik	RIKEN cDNA 5830467E07 gene	1	1	1	1	1	1	0	0	0	6	10	90.5978	0.6	0.00520177
1450816_at	NM_015810	Polg2	polymerase (DNA directed); gamma 2; accessory subunit	1	1	1	1	1	0	0	0	1	6	5	87.0694	0.6	0.00520109								1	1	Homologene group 5221	6	0	1	1	0	0	0	0	0	1	0	1	0	0	0	0	1	0	1
1450935_at	BM198879	Ercc5	excision repair cross-complementing rodent repair deficiency;complementation group 5	1	1	1	1	0	1	0	0	1	6	6	72.397	0.666667	0.00521681								1	1	Homologene group 37265	14	0	1	1	1	1	1	1	0	1	1	1	1	0	1	1	1	0	1
1449597_at	BE647313	LOC236874	similar to odorant binding protein Ib	1	1	1	1	0	1	0	0	1	6	3	68.1052	0	0.00521514
1420578_at	NM_054076	Optc	opticin	1	1	0	1	1	1	0	0	1	6	3	67.1068	0.666667	0.00521356								1	1	Homologene group 8652	6	0	1	1	0	0	0	0	0	1	0	1	0	0	0	0	1	0	1
1418127_a_at	BC003292	Pdcd8	programmed cell death 8	1	0	1	1	1	1	0	0	1	6	3	62.609	0	0.00520756
1438103_at	BG069300	Pcdhgc4	protocadherin gamma subfamily C; 4	1	1	0	1	1	1	0	0	1	6	9	43.0635	0.527778	0.00522542								1	0	Homologene group 110932	0	0	0	0	0	0	0	0	0	1	0	0	0	0	0	0	0	0	0
1432257_at	AK006248	1700022L20Rik	RIKEN cDNA 1700022L20 gene	1	1	1	1	0	1	0	0	1	6	3	37.4439	0	0.00521768
1416857_at	NM_009143	Sdf2	stromal cell derived factor 2	1	1	1	1	1	0	0	0	1	6	8	32.9675	0.821429	0.00520681								1	1	Homologene group 5045	10	1	1	1	1	0	0	1	0	1	0	1	0	1	0	0	1	1	0
1450801_at	NM_020330	Adam21	a disintegrin and metalloprotease domain 21	1	0	1	1	1	1	0	0	1	6	6	30.901	0.666667	0.00519531								1	1	Homologene group 68365	3	0	1	0	0	0	0	0	0	1	0	0	0	0	0	0	1	0	0
1452307_at	BB667491	Cables2	Cdk5 and Abl enzyme substrate 2	1	0	1	1	1	1	0	0	1	6	6	29.8089	0.333333	0.00518963								1	1	Homologene group 45440	4	0	1	0	0	0	0	0	0	1	0	1	0	0	0	0	0	0	1
1454650_at	BQ175280	---	---	1	0	1	1	1	1	0	0	1	6	7	22.4725	0.428571	0.00520675
1430605_at	AK020571	1700023O11Rik	RIKEN cDNA 1700023O11 gene	1	0	1	1	1	1	0	0	1	6	6	22.2346	0.666667	0.00522064
1448196_at	NM_134017	Mat2b	methionine adenosyltransferase II; beta	1	1	0	1	1	1	0	0	1	6	5	22.0417	0.666667	0.00519483								1	1	Homologene group 8323	10	0	1	1	0	0	0	0	0	1	1	1	0	1	1	0	1	1	1
1441369_at	BB329116	---	---	1	1	1	1	1	1	0	0	0	6	18	18.4793	0.833333	0.00521744
1435471_at	BE994129	---	Similar to regulator of sex-limitation candidate 11	1	0	1	1	1	1	0	0	1	6	3	16.8368	0	0.00521861
1451587_a_at	BC002098	1810011K17Rik	RIKEN cDNA 1810011K17 gene	1	1	1	1	1	1	0	0	0	6	4	8.38094	0.666667	0.00521439
1433870_at	AV288135	BC022765	cDNA sequence BC022765	1	1	0	1	1	1	0	0	1	6	11	6.72579	0.666667	0.00515678
1451235_at	BC023032	1500001H12Rik	RIKEN cDNA 1500001H12 gene	1	1	0	1	1	1	0	0	1	6	30	4.99271	0.801471	0.00514214
1434846_at	AW557010	1700065A05Rik	RIKEN cDNA 1700065A05 gene	1	0	1	1	1	1	0	0	1	6	4	4.53798	0	0.00518458
1426292_at	BG068796	6330581L23Rik	RIKEN cDNA 6330581L23 gene	1	1	0	1	1	1	0	0	1	6	3	4.51113	0.333333	0.00520023
1455123_at	BB178719	St18	suppression of tumorigenicity 18	1	0	1	1	1	1	0	0	1	6	3	3.18179	0.333333	0.0051873								1	0	Homologene group 8792	5	0	1	1	0	0	0	0	0	1	0	1	0	0	0	0	1	0	1
1423423_at	BF319868	Grp58	glucose regulated protein	1	1	1	1	1	1	0	0	0	6	5	2.16221	0.8	0.00519581
1460301_at	NM_030741	V1rd2	vomeronasal 1 receptor; D2	1	1	1	1	1	1	0	0	0	6	6	2	0.333333	0.000228571
1441447_at	AV338483	---	---	1	0	1	1	1	1	0	0	1	6	2	1.73848	0	0.00519178
1451051_a_at	BB041274	Scyl1	SCY1-like 1 (S. cerevisiae)	1	1	1	1	0	1	0	0	1	6	2	1.45834	0	0.00520376								1	1	Homologene group 6947	11	1	1	1	1	0	0	1	0	1	1	1	0	1	1	0	0	1	0
1437187_at	BG069355	E2f7	E2F transcription factor 7	1	0	1	1	1	1	0	0	1	6	5	1.0018	0.666667	0.00516655								1	1	Homologene group 18685	7	0	1	1	0	0	0	0	0	1	0	1	0	1	0	0	1	0	1
1430119_at	AK004226	1110051A18Rik	RIKEN cDNA 1110051A18 gene	1	0	1	1	1	1	0	0	1	6	3	1	0	0.000228519
1451161_a_at	U66888	Emr1	EGF-like module containing; mucin-like; hormone receptor-like sequence 1	1	0	1	1	1	1	0	0	1	6	2	1	0	0.000228519								1	0	Homologene group 1493	3	0	1	1	0	0	0	0	0	1	0	0	0	0	0	0	1	0	0
1422801_at	BC021156	MGI:1351465	Ras-GTPase-activating protein SH3-domain binding protein	1	1	1	0	1	1	0	0	1	6	4	0.8	0	0.000228624
1416844_at	NM_133182	Hrmt1l1	heterogeneous nuclear ribonucleoprotein methyltransferase-like 1 (S. cerevisiae)	1	0	1	1	1	0	0	1	1	6	3	0.696643	0.666667	0.00519542
1421563_at	NM_007511	Atp7b	ATPase; Cu++ transporting; beta polypeptide	1	0	1	1	1	1	0	0	1	6	3	0.5	0	0.000228624								1	1	Homologene group 20063	9	0	1	1	1	0	0	1	0	1	0	1	0	1	0	0	0	1	1
1436161_at	BB442341	Aprin	androgen-induced proliferation inhibitor	1	0	1	1	1	1	0	0	1	6	2	0.5	0	0.0051614
1422256_at	NM_009217	Sstr2	somatostatin receptor 2	1	0	1	1	1	1	0	0	1	6	8	0.24524	0.857143	0.0051898								1	1	Homologene group 37427	9	1	1	1	1	0	0	1	0	1	0	1	0	0	0	0	1	0	1
1460014_at	BB740529	Treml4	triggering receptor expressed on myeloid cells-like 4	1	0	1	1	1	1	0	0	1	6	4	0.05	0.833333	0.00516642								1	0	Homologene group 65248	2	0	0	1	0	0	0	0	0	1	0	0	0	0	0	0	1	0	0
1451016_at	BB540964	Ifrd2	interferon-related developmental regulator 2	1	1	0	1	1	1	0	0	1	6	6	0.0454545	0.833333	0.00516633								1	1	Homologene group 21341	7	0	1	1	0	0	0	0	0	1	0	1	0	1	0	0	1	1	0
1432382_at	AK015307	4930434B07Rik	RIKEN cDNA 4930434B07 gene	1	1	1	1	1	1	0	0	0	6	6	0	1	0.00519269
1449216_at	NM_008399	Itgae	integrin; alpha E; epithelial-associated	1	0	1	1	1	1	0	0	1	6	5	0	1	0.00520097								1	0	Homologene group 113560	1	0	1	0	0	0	0	0	0	1	0	0	0	0	0	0	0	0	0
1422329_a_at	NM_008746	Ntrk3	neurotrophic tyrosine kinase; receptor; type 3	0	1	1	1	1	1	0	0	1	6	5	0	1	0.00519232								1	1	Homologene group 49183	5	0	1	1	0	0	0	0	0	1	0	0	0	0	0	0	1	0	1
1431315_at	BM570636	3010015K02Rik	RIKEN cDNA 3010015K02 gene	1	1	1	1	1	1	0	0	0	6	5	0	1	0.00519501
1423284_at	AK002644	Mansc1	MANSC domain containing 1	1	1	0	1	1	1	0	0	1	6	4	0	1	0.00518453								1	1	Homologene group 49522	5	0	1	1	0	0	0	0	0	1	0	0	0	0	0	0	1	0	1
1446432_at	BB261988	B530045E10Rik	RIKEN cDNA B530045E10 gene	1	0	1	1	1	1	0	0	1	6	4	0	1	0.00519863
1420569_at	NM_007689	Chad	chondroadherin	1	0	1	1	1	1	0	0	1	6	4	0	1	0.00516954								1	0	Homologene group 36063	3	0	1	1	0	0	0	0	0	0	0	1	0	0	0	0	0	0	1
1418536_at	M29881	H2-Q7	Histocompatibility 2; Q region locus 6	1	0	1	1	1	1	0	0	1	6	4	0	1	0.0050948
1419126_at	BC019150	Hoxd9	homeo box D9	1	0	1	1	1	1	0	0	1	6	4	0	1	0.00515635								1	1	Homologene group 8409	5	0	1	1	0	0	0	0	0	1	0	1	0	0	0	0	0	0	1
1427222_a_at	AK020349	Svp2	seminal vesicle protein 2	1	0	1	1	1	1	0	0	1	6	4	0	1	0.0051775
1443490_at	C77371	Tpm3	Tropomyosin 3; gamma	1	1	1	1	1	0	0	0	1	6	4	0	1	0.00516087								1	1	Homologene group 81889	6	1	1	0	0	0	0	1	0	1	0	1	0	0	0	0	1	0	0
1456492_at	BB279767	A930019L04Rik	RIKEN cDNA A930019L04 gene	0	1	1	1	1	1	0	0	1	6	4	0	1	0.00517875
1456919_at	BB750000	A930013B10Rik	RIKEN cDNA A930013B10 gene	1	1	1	1	1	1	0	0	0	6	4	0	1	0.000228571
1422535_at	AF091432	---	---	1	0	0	1	1	1	0	1	1	6	3	0	1	0.00510733
1460726_at	NM_007422	Adss	adenylosuccinate synthetase; non muscle	1	0	1	1	1	1	0	0	1	6	3	0	1	0.00520244								1	1	Homologene group 875	9	1	1	1	1	0	0	1	0	1	0	1	0	0	0	0	1	0	1
1420601_at	NM_008103	Gcm1	glial cells missing homolog 1 (Drosophila)	1	1	1	0	1	1	0	0	1	6	2	0	NA	0.0051928								1	1	Homologene group 2702	5	0	1	1	0	0	0	0	0	1	0	0	0	0	0	0	1	0	1
1424524_at	BC021433	1200002N14Rik	RIKEN cDNA 1200002N14 gene	1	1	0	1	1	1	0	0	1	6	2	0	NA	0.00519989								1	1	Homologene group 41255	5	0	1	0	0	0	0	0	0	1	0	1	0	0	0	0	1	0	1
1432689_at	AK014529	---	---	1	1	0	1	1	1	0	0	1	6	2	0	NA	0.00517993
1423556_at	AV021656	Akr1b7	aldo-keto reductase family 1; member B7	1	1	0	1	1	1	0	0	1	6	2	0	NA	0.00519823									0	Homologene group 117960	3	1	0	1	1	0	0	1	0	0	0	0	0	0	0	0	0	0	0
1452641_at	BC028663	BC028663	cDNA sequence BC028663	1	1	0	1	1	1	0	0	1	6	2	0	NA	0.00514905
1454782_at	BE979636	Bai3	brain-specific angiogenesis inhibitor 3	1	1	0	1	1	1	0	0	1	6	2	0	NA	0.00517322								1	1	Homologene group 1289	4	0	1	1	0	0	0	0	0	1	0	0	0	0	0	0	0	0	1
1431497_at	AK021219	C330022C24Rik	RIKEN cDNA C330022C24 gene	1	1	0	1	1	1	0	0	1	6	2	0	NA	0.00515365
1424218_a_at	BC022605	Creb3l4	cAMP responsive element binding protein 3-like 4	1	1	0	1	1	1	0	0	1	6	2	0	NA	0.00518435								1	1	Homologene group 12693	4	0	1	1	0	0	0	0	0	1	0	0	0	0	0	0	1	0	0
1425811_a_at	BF124540	Csrp1	cysteine and glycine-rich protein 1	1	1	0	1	1	1	0	0	1	6	2	0	NA	0.00516898								1	0	Homologene group 37874	8	1	1	1	1	0	0	1	0	1	0	1	0	0	0	0	1	0	1
1418862_at	NM_024208	Echdc3	enoyl Coenzyme A hydratase domain containing 3	1	1	0	1	1	1	0	0	1	6	2	0	NA	0.000228467								1	1	Homologene group 11484	9	1	1	0	1	0	0	1	0	1	0	1	0	0	1	0	1	0	1
1423164_at	AK010724	Tm7sf1	transmembrane 7 superfamily member 1	1	1	0	1	1	1	0	0	1	6	2	0	NA	0.000228467
1426318_at	AF426025	Serpinb1b	serine (or cysteine) proteinase inhibitor; clade B; member 1b	1	1	0	1	1	1	0	0	1	6	2	0	1	0.00518584									0	Homologene group 113506	0	0	0	1	0	0	0	0	0	0	0	0	0	0	0	0	0	0	0
1449430_a_at	NM_021481	Treh	trehalase (brush-border membrane glycoprotein)	1	1	0	1	1	1	0	0	1	6	2	0	1	0.00519538								1	1	Homologene group 5198	12	1	1	1	1	0	0	1	0	1	1	1	0	1	1	0	1	1	0
1433028_at	AK014679	4833411I10Rik	RIKEN cDNA 4833411I10 gene	1	0	1	1	1	1	0	0	1	6	2	0	NA	0.00517879
1429551_at	AK007417	4930579G22Rik	RIKEN cDNA 4930579G22 gene	1	0	1	1	1	1	0	0	1	6	2	0	NA	0.00510603
1432880_at	AK018356	6820402A03Rik	RIKEN cDNA 6820402A03 gene	1	0	1	1	1	1	0	0	1	6	2	0	NA	0.00515007
1425221_at	BC023499	E030025L21Rik	RIKEN cDNA E030025L21 gene	1	0	1	1	1	1	0	0	1	6	2	0	NA	0.00513656
1442999_at	BB342280	B930036G03Rik	RIKEN cDNA B930036G03 gene	1	0	1	1	1	1	0	0	1	6	2	0	NA	0.00517866
1427341_at	U85993	E130103I17Rik	RIKEN cDNA E130103I17 gene	1	0	1	1	1	1	0	0	1	6	2	0	NA	0.00519912
1416133_at	BB188557	C920006C10Rik	RIKEN cDNA C920006C10 gene	1	0	1	1	1	1	0	0	1	6	2	0	NA	0.00521843
1435191_at	BM231053	Cdsn	corneodesmosin	1	0	1	1	1	1	0	0	1	6	2	0	NA	0.00515748								1	1	Homologene group 48005	3	0	1	0	0	0	0	0	0	1	0	0	0	0	0	0	1	0	0
1420704_at	BM941868	---	---	1	0	1	1	1	1	0	0	1	6	2	0	NA	0.000228467
1434065_at	AV270779	Cwf19l1	CWF19-like 1; cell cycle control (S. pombe)	1	0	1	1	1	1	0	0	1	6	2	0	NA	0.00517936								1	1	Homologene group 41244	11	1	1	1	1	0	0	1	0	1	0	1	0	1	0	0	1	1	1
1417790_at	BC013066	Dok1	docking protein 1	1	0	1	1	1	1	0	0	1	6	2	0	NA	0.00519552								1	0	Homologene group 1057	4	0	1	1	0	0	0	0	0	1	0	1	0	0	0	0	1	0	0
1454261_at	AK021412	E130304I02Rik	RIKEN cDNA E130304I02 gene	1	0	1	1	1	1	0	0	1	6	2	0	NA	0.00510713
1417203_at	BC010592	Ethe1	ethylmalonic encephalopathy 1	1	0	1	1	1	1	0	0	1	6	2	0	NA	0.00517518								1	1	Homologene group 8622	11	1	1	1	1	0	0	1	0	1	0	1	0	1	0	0	1	1	1
1422489_at	NM_020619	Gcs1	glucosidase 1	1	0	1	1	1	1	0	0	1	6	2	0	NA	0.00519776								1	0	Homologene group 4593	9	1	1	1	1	0	0	0	0	1	0	1	0	1	1	0	1	1	0
1427863_at	Z30939	---	---	1	0	1	1	1	1	0	0	1	6	2	0	NA	0.000228467
1433805_at	BQ032637	Jak1	Janus kinase 1	1	0	1	1	1	1	0	0	1	6	2	0	NA	0.000228467								1	0	Homologene group 1678	5	0	1	1	0	0	0	0	0	1	0	1	0	0	0	0	1	0	1
1437518_at	BM203642	---	Hypothetical gene supported by AK082312	1	0	1	1	1	1	0	0	1	6	2	0	NA	0.00518149
1445336_at	BQ175429	---	Transcribed locus	1	0	1	1	1	1	0	0	1	6	2	0	NA	0.00517709
1432384_a_at	AK006715	1600013P15Rik	RIKEN cDNA 1600013P15 gene	1	0	1	1	1	1	0	0	1	6	2	0	NA	0.000228467
1434151_at	AV171622	3300001H21Rik	RIKEN cDNA 3300001H21 gene	1	0	1	1	1	1	0	0	1	6	2	0	NA	0.000228467
1429238_a_at	AK004916	5730405M13Rik	RIKEN cDNA 5730405M13 gene	1	0	1	1	1	1	0	0	1	6	2	0	1	0.00516099
1418892_at	AF309564	Rhoj	ras homolog gene family; member J	1	0	1	1	1	1	0	0	1	6	2	0	1	0.00518792								1	1	Homologene group 56894	6	0	1	1	0	0	0	0	0	1	0	1	0	0	0	0	1	0	1
1426880_at	BM250266	BC026657	CDNA sequence BC026657	1	1	1	1	1	0	0	0	1	6	2	0	NA	0.000228519
1452117_a_at	BB157866	Fyb	FYN binding protein	1	1	1	1	1	0	0	0	1	6	2	0	NA	0.00520004								1	1	Homologene group 22664	5	0	1	1	0	0	0	0	0	1	0	1	0	0	0	0	0	0	1
1454751_at	BM247306	G430022H21Rik	RIKEN cDNA G430022H21 gene	1	1	1	1	1	0	0	0	1	6	2	0	NA	0.00520622								1	1	Homologene group 10865	13	0	1	1	1	1	0	1	0	1	0	1	1	1	0	1	1	1	1
1436172_at	BQ175154	9530028C05	hypothetical protein 9530028C05	1	1	1	1	0	1	0	0	1	6	2	0	NA	0.00514905
1437310_at	BB121315	Bbs1	Bardet-Biedl syndrome 1 homolog (human)	1	1	1	1	0	1	0	0	1	6	2	0	NA	0.00518579								1	1	Homologene group 11641	7	1	1	1	1	0	0	1	0	1	0	1	0	0	0	0	0	0	0
1422013_at	NM_011999	Clec4a2	C-type lectin domain family 4; member a2	1	1	1	1	0	1	0	0	1	6	2	0	NA	0.005189								1	0	Homologene group 86708	0	0	0	1	0	0	0	0	0	0	0	0	0	0	0	0	0	0	0
1422180_a_at	NM_010781	Mcpt6	mast cell protease 6	1	1	1	1	0	1	0	0	1	6	2	0	1	0.00518914
1437291_at	AV131166	2700081O15Rik	RIKEN cDNA 2700081O15 gene	1	1	1	1	1	1	0	0	0	6	2	0	NA	0.000228467								1	0	Homologene group 52179	2	0	0	1	0	0	0	0	0	1	0	0	0	0	0	0	1	0	0
1432789_at	BB068813	---	---	1	1	1	1	1	1	0	0	0	6	2	0	NA	0.00515376
1459922_at	AA216889	AI646383	Expressed sequence AI646383	1	1	1	1	1	1	0	0	0	6	2	0	NA	0.00517852
1444911_at	BG069160	9030605H24Rik	RIKEN cDNA 9030605H24 gene	1	1	1	1	1	1	0	0	0	6	2	0	NA	0.00519742
1420827_a_at	BG065754	---	---	1	1	1	1	1	1	0	0	0	6	2	0	NA	0.00521436
1427981_a_at	AY033912	Csad	cysteine sulfinic acid decarboxylase	1	1	1	1	1	1	0	0	0	6	2	0	NA	0.00519706								1	0	Homologene group 41086	5	0	1	1	1	0	0	1	0	1	0	1	0	0	0	0	0	0	0
1434928_at	BB769886	Gas2l1	growth arrest-specific 2 like 1	1	1	1	1	1	1	0	0	0	6	2	0	NA	0.000228467									1	Homologene group 4733	4	0	1	1	0	0	0	0	0	1	0	1	0	0	0	0	0	0	0
1449391_at	NM_009554	Zfp37	zinc finger protein 37	1	1	1	1	1	1	0	0	0	6	2	0	1	0.00522316								1	1	Homologene group 40682	3	0	1	1	0	0	0	0	0	1	0	0	0	0	0	0	0	0	0
1437572_at	BG968708	Dcp1b	DCP1 decapping enzyme homolog b (S. cerevisiae)	1	1	1	0	1	1	0	0	1	6	1	0	NA	0.0051521								1	1	Homologene group 51881	6	0	1	1	0	0	0	0	0	1	0	1	0	0	0	0	1	0	1
1431910_at	AK017676	5730460C07Rik	RIKEN cDNA 5730460C07 gene	1	1	0	1	1	1	0	0	1	6	1	0	NA	0.00517073
1439729_at	BB463084	A930038B10Rik	RIKEN cDNA A930038B10 gene	1	1	0	1	1	1	0	0	1	6	1	0	NA	0.000228519
1457052_at	BG064867	AW536275	Expressed sequence AW536275	1	1	0	1	1	1	0	0	1	6	1	0	NA	0.00515088
1451708_at	AF045766	Gpr33	G protein-coupled receptor 33	1	1	0	1	1	1	0	0	1	6	1	0	NA	0.00515329								1	1	Homologene group 7345	2	0	0	1	0	0	0	0	0	0	0	0	0	0	0	0	1	0	0
1448598_at	NM_011846	Mmp17	matrix metalloproteinase 17	1	1	0	1	1	1	0	0	1	6	1	0	NA	0.000228571								1	1	Homologene group 22669	9	1	1	1	1	0	0	1	0	1	0	1	0	0	0	0	1	0	1
1448787_at	BC014715	Moap1	modulator of apoptosis 1	1	1	0	1	1	1	0	0	1	6	1	0	NA	0.00515483								1	0	Homologene group 11154	2	0	0	1	0	0	0	0	0	1	0	0	0	0	0	0	1	0	0
1458550_at	BB200258	Myo1d	myosin ID	1	1	0	1	1	1	0	0	1	6	1	0	NA	0.00520434								1	1	Homologene group 45576	9	1	1	1	1	0	0	1	0	1	0	1	0	0	0	0	1	0	1
1460601_at	BB429683	Myrip	myosin VIIA and Rab interacting protein	1	1	0	1	1	1	0	0	1	6	1	0	NA	0.000228519								1	1	Homologene group 9150	6	0	1	1	0	0	0	0	0	1	0	1	0	0	0	0	1	0	1
1452815_at	AK020001	P2ry10	purinergic receptor P2Y; G-protein coupled 10	1	1	0	1	1	1	0	0	1	6	1	0	NA	0.00520517								1	1	Homologene group 8717	5	0	1	1	0	0	0	0	0	1	0	1	0	0	0	0	0	0	1
1434510_at	BF780807	1810018P12Rik	RIKEN cDNA 1810018P12 gene	1	1	0	1	1	1	0	0	1	6	1	0	NA	0.00520442
1460214_at	NM_008791	Pcp4	Purkinje cell protein 4	1	1	0	1	1	1	0	0	1	6	1	0	NA	0.00511696								1	1	Homologene group 4519	5	0	1	1	0	0	0	0	0	1	0	0	0	0	0	0	1	0	1
1424208_at	BC011193	---	---	1	1	0	1	1	1	0	0	1	6	1	0	NA	0.000228467
1442264_at	BB089844	LOC381240	similar to calcium and DAG-regulated guanine nucleotide exchange factor I	1	1	0	1	1	1	0	0	1	6	1	0	NA	0.00518129
1416639_at	NM_019741	Slc2a5	solute carrier family 2 (facilitated glucose transporter); member 5	1	1	0	1	1	1	0	0	1	6	1	0	NA	0.00519162								1	1	Homologene group 74459	5	0	1	1	0	0	0	0	0	1	0	0	0	0	0	0	1	0	1
1436244_a_at	AU067681	Tle2	transducin-like enhancer of split 2; homolog of Drosophila E(spl)	1	1	0	1	1	1	0	0	1	6	1	0	NA	0.000228467								1	1	Homologene group 20693	3	0	0	1	0	0	0	0	0	1	0	0	0	0	0	0	1	0	0
1451304_at	BC017618	2310076O21Rik	RIKEN cDNA 2310076O21 gene	1	1	0	1	1	1	0	0	1	6	1	0	NA	0.00517655
1451944_a_at	AB032771	Tnfsf11	tumor necrosis factor (ligand) superfamily; member 11	1	1	0	1	1	1	0	0	1	6	1	0	NA	0.00511868								1	1	Homologene group 2744	5	0	1	1	0	0	0	0	0	1	0	0	0	0	0	0	1	0	1
1436112_at	BB128317	AI118078	expressed sequence AI118078	1	0	1	1	1	1	0	0	1	6	1	0	NA	0.00513549								1	1	Homologene group 17551	6	0	1	1	0	0	0	0	0	1	0	1	0	0	0	0	1	0	1
1449417_at	NM_009664	Ambn	ameloblastin	1	0	1	1	1	1	0	0	1	6	1	0	NA	0.000228467								1	1	Homologene group 7625	4	0	1	1	0	0	0	0	0	1	0	0	0	0	0	0	1	0	0
1416684_at	NM_007991	Fbl	fibrillarin	1	0	1	1	1	1	0	0	1	6	1	0	NA	0.00518587								1	1	Homologene group 1099	17	1	1	1	1	1	1	1	1	1	1	1	1	1	1	1	1	1	0
1430080_at	AK010913	Fcnb	ficolin B	1	0	1	1	1	1	0	0	1	6	1	0	NA	0.00518678									0	Homologene group 1518	3	0	1	1	0	0	0	0	0	1	0	0	0	0	0	0	1	0	0
1420589_at	NM_008217	Has3	hyaluronan synthase 3	1	0	1	1	1	1	0	0	1	6	1	0	NA	0.00517457								1	1	Homologene group 68461	6	0	1	1	0	0	0	0	0	1	0	1	0	0	0	0	1	0	1
1421628_at	NM_008365	Il18r1	interleukin 18 receptor 1	1	0	1	1	1	1	0	0	1	6	1	0	NA	0.000228467								1	1	Homologene group 2861	5	0	1	1	0	0	0	0	0	1	0	0	0	0	0	0	1	0	1
1419460_at	BI455861	Rpp14	ribonuclease P 14 subunit (human)	1	0	1	1	1	1	0	0	1	6	1	0	NA	0.00520158								1	1	Homologene group 5113	5	0	1	1	0	0	0	0	0	1	0	0	0	0	0	0	1	0	1
1428098_a_at	AK010720	Tm7sf3	transmembrane 7 superfamily member 3	1	0	1	1	1	1	0	0	1	6	1	0	NA	0.00516817								1	1	Homologene group 9560	6	0	1	1	0	0	0	0	0	1	0	1	0	0	0	0	1	0	1
1422309_a_at	NM_020517	Lenep /// A930017E24Rik	lens epithelial protein /// RIKEN cDNA A930017E24 gene	1	0	1	1	1	1	0	0	1	6	1	0	NA	0.000228467
1429388_at	AK010332	Nanog	Nanog homeobox	1	0	1	1	1	1	0	0	1	6	1	0	NA	0.00515571								1
1452246_at	U58888	Ostf1	osteoclast stimulating factor 1	1	0	1	1	1	1	0	0	1	6	1	0	NA	0.00519391								1	1	Homologene group 8227	7	1	1	1	0	0	0	0	0	1	0	1	0	0	0	0	1	0	1
1449938_at	AI528824	Pp11r	placental protein 11 related	1	0	1	1	1	1	0	0	1	6	1	0	NA	0.0051507								1	1	Homologene group 48394	6	1	1	1	0	0	0	0	0	1	0	1	0	0	0	0	1	0	0
1450375_at	NM_008954	Pspn	persephin	1	0	1	1	1	1	0	0	1	6	1	0	NA	0.00519035								1	1	Homologene group 3065	4	0	1	1	0	0	0	0	0	1	0	0	0	0	0	0	1	0	0
1419221_a_at	NM_016758	Rgs14	regulator of G-protein signaling 14	1	0	1	1	1	1	0	0	1	6	1	0	NA	0.000228467								1	1	Homologene group 4735	5	0	1	1	0	0	0	0	0	1	0	0	0	0	0	0	1	0	1
1454697_at	AI226757	Tloc1	translocation protein 1	1	0	1	1	1	1	0	0	1	6	1	0	NA	0.000228467
1433802_at	BM114677	AW125688	expressed sequence AW125688	1	0	1	1	1	1	0	0	1	6	1	0	NA	0.0051905
1423909_at	BC010831	0610011I04Rik	RIKEN cDNA 0610011I04 gene	1	0	1	1	1	1	0	0	1	6	1	0	NA	0.000228519
1419440_at	NM_021447	Rnf30	ring finger protein 30	1	0	1	1	1	1	0	0	1	6	1	0	NA	0.00513158
1435582_at	BM222853	---	MKIAA1607 protein	1	0	1	1	1	1	0	0	1	6	1	0	NA	0.00515748
1455301_at	BG064092	BQ952480	expressed sequence BQ952480	1	0	1	1	1	1	0	0	1	6	1	0	NA	0.00515313
1436095_at	AV274538	Chd5	chromodomain helicase DNA binding protein 5	1	1	1	1	1	0	0	0	1	6	1	0	NA	0.000228467								1	1	Homologene group 56712	4	0	1	1	0	0	0	0	0	1	0	0	0	0	0	0	1	0	0
1443510_at	BQ033268	AW822216	expressed sequence AW822216	1	1	1	1	1	0	0	0	1	6	1	0	NA	0.00518816
1454064_a_at	AK013419	Rnf138	ring finger protein 138	1	1	1	1	1	0	0	0	1	6	1	0	NA	0.000228467								1	1	Homologene group 9446	5	0	1	1	0	0	0	0	0	1	0	0	0	0	0	0	1	0	1
1454401_at	AK017710	---	---	1	1	1	1	0	1	0	0	1	6	1	0	NA	0.000228467
1440310_at	BB451090	Cbfa2t1h	CBFA2T1 identified gene homolog (human)	1	1	1	1	0	1	0	0	1	6	1	0	NA	0.0051738
1448587_at	NM_134023	Tbc1d10	TBC1 domain family; member 10	1	1	1	1	0	1	0	0	1	6	1	0	NA	0.00519676
1418803_a_at	NM_010177	Tnfsf6	tumor necrosis factor (ligand) superfamily; member 6	0	1	1	1	1	1	0	0	1	6	1	0	NA	0.00515044
1428004_at	BC028766	3300001G02Rik	RIKEN cDNA 3300001G02 gene	1	1	1	1	1	1	0	0	0	6	1	0	NA	0.00515648
1446711_at	BB165609	A130040G06Rik	RIKEN cDNA A130040G06 gene	1	1	1	1	1	1	0	0	0	6	1	0	NA	0.00518809
1442934_at	BG067071	---	---	1	1	1	1	1	1	0	0	0	6	1	0	NA	0.00519176
1460614_at	BB530158	D130064H19Rik	RIKEN cDNA D130064H19 gene	1	1	1	1	1	1	0	0	0	6	1	0	NA	0.00517436
1460273_a_at	NM_010872	Birc1b	baculoviral IAP repeat-containing 1b	1	1	1	1	1	1	0	0	0	6	1	0	NA	0.000228467
1452725_a_at	AK010292	Rnaseh2a	Ribonuclease H2; large subunit	1	1	1	1	1	1	0	0	0	6	1	0	NA	0.00515745								1	1	Homologene group 4664	17	1	1	1	1	1	1	1	1	1	1	1	1	1	1	1	1	1	0
1449067_at	NM_031197	Slc2a2	solute carrier family 2 (facilitated glucose transporter); member 2	1	1	1	1	1	1	0	0	0	6	1	0	NA	0.00519498								1	1	Homologene group 68047	6	0	1	1	0	0	0	0	0	1	0	1	0	0	0	0	1	0	1
1455675_a_at	BM122619	Tial1	Tial1 cytotoxic granule-associated RNA binding protein-like 1	1	1	1	1	1	1	0	0	0	6	1	0	NA	0.00518968								1	1	Homologene group 87796	10	0	1	1	1	0	0	1	0	1	0	1	0	1	0	0	1	1	1
1456824_at	BQ176690	---	Transcribed locus	1	1	1	1	1	1	0	0	0	6	1	0	NA	0.00519125
1416805_at	NM_133187	1110032E23Rik	RIKEN cDNA 1110032E23 gene	1	0	0	1	1	1	0	1	1	6												1	1	Homologene group 9590	5	0	0	1	0	0	0	0	0	1	0	1	0	0	0	0	1	0	1
1420907_at	BB398671	Cd2ap	CD2-associated protein	1	0	0	1	1	1	0	1	1	6												1	1	Homologene group 7663	5	0	1	1	0	0	0	0	0	1	0	1	0	0	0	0	1	0	0
1417399_at	NM_019521	Gas6	growth arrest specific 6	1	0	0	1	1	1	0	1	1	6												1	1	Homologene group 638	6	0	1	1	0	0	0	0	0	1	0	1	0	0	0	0	1	0	1
1426900_at	AV293164	Jmjd1c	jumonji domain containing 1C	1	0	0	1	1	1	0	1	1	6												1	1	Homologene group 3129	6	0	1	1	0	0	0	0	0	1	0	1	0	0	0	0	1	0	1
1419384_at	NM_008837	Prkcabp	protein kinase C; alpha binding protein	1	0	1	1	1	0	0	1	1	6
1419427_at	NM_009971	Csf3	colony stimulating factor 3 (granulocyte)	1	0	1	1	0	1	0	1	1	6												1	1	Homologene group 7677	3	0	1	1	0	0	0	0	0	1	0	0	0	0	0	0	0	0	0
1425118_at	BC026502	Spire2	spire homolog 2 (Drosophila)	1	0	1	1	0	1	0	1	1	6												1	0	Homologene group 72212	5	0	1	1	0	0	0	0	0	1	0	1	0	0	0	0	1	0	1
1429484_at	BB752416	1110002L01Rik	RIKEN cDNA 1110002L01 gene	1	1	1	0	1	1	0	0	1	6
1417566_at	AK007421	Abhd5	abhydrolase domain containing 5	1	1	1	0	1	1	0	0	1	6												1	1	Homologene group 41088	5	0	1	1	0	0	0	0	0	1	0	1	0	0	0	0	1	0	0
1428239_at	AK013354	Ankrd16	ankyrin repeat domain 16	1	1	1	0	1	1	0	0	1	6													1	Homologene group 19509	5	0	0	1	0	0	0	0	0	1	0	1	0	0	0	0	1	0	1
1418708_at	BC024657	Apoc4	apolipoprotein C-IV	1	1	1	0	1	1	0	0	1	6												1	1	Homologene group 1245	4	0	1	1	0	0	0	0	0	1	0	0	0	0	0	0	1	0	0
1439171_at	BI964419	C530008M17Rik	RIKEN cDNA C530008M17 gene	1	1	1	0	1	1	0	0	1	6													1	Homologene group 18951	6	0	1	1	0	0	0	0	0	1	0	1	0	0	0	0	1	0	1
1454680_at	BG073020	D5Ertd579e	DNA segment; Chr 5; ERATO Doi 579; expressed	1	1	1	0	1	1	0	0	1	6												1	1	Homologene group 19716	6	0	1	1	0	0	0	0	0	1	0	1	0	0	0	0	1	0	1
1436218_at	AV337396	---	---	1	1	1	0	1	1	0	0	1	6
1422662_at	AI987967	Lgals8	lectin; galactose binding; soluble 8	1	1	1	0	1	1	0	0	1	6												1	1	Homologene group 31386	6	0	1	1	0	0	0	0	0	1	0	1	0	0	0	0	1	0	1
1428358_at	BF581690	1810010M01Rik	RIKEN cDNA 1810010M01 gene	1	1	0	1	1	1	0	0	1	6												1	1	Homologene group 12296	4	0	1	1	0	0	0	0	0	1	0	0	0	0	0	0	1	0	0
1428619_at	BB783243	2310005N03Rik	RIKEN cDNA 2310005N03 gene	1	1	0	1	1	1	0	0	1	6												1	1	Homologene group 11956	6	0	1	1	0	0	0	0	0	1	0	1	0	0	0	0	1	0	1
1450642_at	NM_133725	3110001I20Rik	RIKEN cDNA 3110001I20 gene	1	1	0	1	1	1	0	0	1	6												1	0	Homologene group 18923	6	0	1	1	1	0	0	1	0	1	0	0	0	0	0	0	1	0	1
1431516_at	AK019787	4930565N06Rik	RIKEN cDNA 4930565N06 gene	1	1	0	1	1	1	0	0	1	6
1417862_at	NM_021427	A830059I20Rik	RIKEN cDNA A830059I20 gene	1	1	0	1	1	1	0	0	1	6
1438340_at	BB277600	A930006D11	hypothetical protein A930006D11	1	1	0	1	1	1	0	0	1	6
1435673_at	BB756663	AI448005	Expressed sequence AI448005	1	1	0	1	1	1	0	0	1	6
1449457_at	AB078618	MGI:1921406	cytosolic acetyl-CoA hydrolase	1	1	0	1	1	1	0	0	1	6
1431923_at	AK012958	2810401C16Rik	RIKEN cDNA 2810401C16 gene	1	1	0	1	1	1	0	0	1	6
1418601_at	NM_011921	---	---	1	1	0	1	1	1	0	0	1	6
1460639_a_at	NM_009720	Atox1	ATX1 (antioxidant protein 1) homolog 1 (yeast)	1	1	0	1	1	1	0	0	1	6												1	1	Homologene group 2984	5	0	1	1	0	0	0	0	0	1	0	0	0	0	0	0	1	0	1
1426367_at	AK013205	Cab39l	calcium binding protein 39-like	1	1	0	1	1	1	0	0	1	6												1	1	Homologene group 69422	5	0	1	1	0	0	0	0	0	1	0	1	0	0	0	0	1	0	0
1418688_at	NM_007588	Calcr	calcitonin receptor	1	1	0	1	1	1	0	0	1	6												1	1	Homologene group 1320	6	0	1	1	0	0	0	0	0	1	0	1	0	0	0	0	1	0	1
1420067_at	AU045688	---	---	1	1	0	1	1	1	0	0	1	6
1416698_a_at	NM_016904	Cks1b	CDC28 protein kinase 1b	1	1	0	1	1	1	0	0	1	6												1	1	Homologene group 1380	9	1	1	1	1	0	0	1	0	1	0	1	0	1	0	0	1	0	0
1431240_at	AK017207	Clec2h	C-type lectin domain family 2; member h	1	1	0	1	1	1	0	0	1	6												1
1454979_at	BM120370	Diap1	diaphanous homolog 1 (Drosophila)	1	1	0	1	1	1	0	0	1	6												1	0	Homologene group 55880	5	0	0	1	0	0	0	0	0	1	1	0	0	0	1	0	0	1	1
1444187_at	BG067710	---	Adult male aorta and vein cDNA; RIKEN full-length enriched library; clone:A530061C19 product:unknown EST; full insert sequence	1	1	0	1	1	1	0	0	1	6
1448649_at	NM_007934	Enpep	glutamyl aminopeptidase	1	1	0	1	1	1	0	0	1	6												1	1	Homologene group 68216	6	0	1	0	1	0	0	1	0	1	0	0	0	0	0	0	1	0	1
1436817_at	AV025913	---	---	1	1	0	1	1	1	0	0	1	6
1426982_at	BB477613	E030034P13Rik	RIKEN cDNA E030034P13 gene	1	1	0	1	1	1	0	0	1	6
1439795_at	AV242919	Gpr64	G protein-coupled receptor 64	1	1	0	1	1	1	0	0	1	6												1	0	Homologene group 4208	5	0	1	1	0	0	0	0	0	1	0	1	0	0	0	0	1	0	1
1423689_a_at	BC026486	Gpsm1	G-protein signalling modulator 1 (AGS3-like; C. elegans)	1	1	0	1	1	1	0	0	1	6												1	0	Homologene group 16987	5	0	1	1	0	0	0	0	0	1	0	1	0	0	0	0	1	0	1
1428933_at	AK011332	Hdac8	RIKEN cDNA 4732468M13 gene	1	1	0	1	1	1	0	0	1	6												1	0	Homologene group 41274	5	0	1	1	0	0	0	0	0	1	0	1	0	0	0	0	1	0	1
1433605_at	BB307136	Inpp5a	inositol polyphosphate-5-phosphatase A	1	1	0	1	1	1	0	0	1	6												1	1	Homologene group 4045	9	1	1	1	1	0	0	1	0	1	0	1	0	0	0	0	1	0	1
1435692_at	BQ176086	---	Transcribed locus; strongly similar to XP_374915.2 hypothetical protein LOC283219 [Homo sapiens]	1	1	0	1	1	1	0	0	1	6
1418538_at	NM_134090	Kdelr3	KDEL (Lys-Asp-Glu-Leu) endoplasmic reticulum protein retention receptor 3	1	1	0	1	1	1	0	0	1	6												1	1	Homologene group 68533	9	0	1	1	0	0	0	0	1	1	0	1	0	1	0	0	1	1	1
1425787_a_at	AB050743	Sytl3	synaptotagmin-like 3	1	1	0	1	1	1	0	0	1	6												1	1	Homologene group 12855	4	0	1	1	0	0	0	0	0	1	0	0	0	0	0	0	1	0	0
1416653_at	NM_011504	Stxbp3	syntaxin binding protein 3	1	1	0	1	1	1	0	0	1	6
1427388_at	AJ428068	Lrrc2	Leucine rich repeat containing 2	1	1	0	1	1	1	0	0	1	6												1	1	Homologene group 23454	6	0	1	1	0	0	0	0	0	1	0	1	0	0	0	0	1	0	1
1436907_at	BE980206	Nav1	neuron navigator 1	1	1	0	1	1	1	0	0	1	6												1	0	Homologene group 10719	2	0	1	0	0	0	0	0	0	1	0	1	0	0	0	0	0	0	0
1434737_at	AV000765	Obfc1	oligonucleotide/oligosaccharide-binding fold containing 1	1	1	0	1	1	1	0	0	1	6												1	1	Homologene group 11788	6	0	1	1	0	0	0	0	0	1	0	1	0	0	0	0	1	0	1
1451592_at	AF364868	MGI:2446472	Myb protein P42POP	1	1	0	1	1	1	0	0	1	6
1418924_at	NM_025886	2400009B11Rik	RIKEN cDNA 2400009B11 gene	1	1	0	1	1	1	0	0	1	6
1443768_at	BG101505	---	---	1	1	0	1	1	1	0	0	1	6
1435151_a_at	AW108231	Rps3	ribosomal protein S3	1	1	0	1	1	1	0	0	1	6												1	1	Homologene group 779	18	1	1	1	1	1	1	1	1	1	1	1	1	1	1	1	1	1	1
1434490_at	AA986099	Scarf1	scavenger receptor class F; member 1	1	1	0	1	1	1	0	0	1	6												1	1	Homologene group 2741	5	0	1	1	0	0	0	0	0	1	0	1	0	0	0	0	0	0	1
1457094_at	AV229195	---	Transcribed locus	1	1	0	1	1	1	0	0	1	6
1417884_at	NM_134038	Slc16a6	solute carrier family 16 (monocarboxylic acid transporters); member 6	1	1	0	1	1	1	0	0	1	6												1	1	Homologene group 20984	8	0	1	1	0	0	0	0	0	1	1	1	0	0	1	0	1	0	1
1421912_at	AA276202	Slc23a1	solute carrier family 23 (nucleobase transporters); member 1	1	1	0	1	1	1	0	0	1	6												1	1	Homologene group 40769	7	0	1	1	0	0	0	0	0	1	0	1	0	1	0	0	1	1	0
1423926_at	BC020106	Slc39a13	solute carrier family 39 (metal ion transporter); member 13	1	1	0	1	1	1	0	0	1	6												1	1	Homologene group 62681	9	1	1	1	1	0	1	1	0	1	0	1	0	0	0	0	0	0	1
1429596_at	AK010254	2400002F02Rik	CDNA sequence BC006705	1	1	0	1	1	1	0	0	1	6
1420883_at	AK008863	Sln	sarcolipin	1	1	0	1	1	1	0	0	1	6												1
1424817_at	BC006046	4931426K16Rik	RIKEN cDNA 4931426K16 gene	1	1	0	1	1	1	0	0	1	6
1454909_at	BQ176888	Tacc1	transforming; acidic coiled-coil containing protein 1	1	1	0	1	1	1	0	0	1	6												1	1	Homologene group 4575	6	0	1	1	0	0	0	0	0	1	0	1	0	0	0	0	1	0	1
1416710_at	NM_026239	Tmem35	transmembrane protein 35	1	1	0	1	1	1	0	0	1	6												1	1	Homologene group 11008	8	0	1	1	1	0	0	1	0	1	0	1	0	0	0	0	1	0	1
1439855_at	AV341449	BC023818	cDNA sequence BC023818	1	1	0	1	1	1	0	0	1	6
1450813_a_at	NM_021467	Tnni1	troponin I; skeletal; slow 1	1	1	0	1	1	1	0	0	1	6												1	0	Homologene group 2462	3	0	0	1	0	0	0	0	0	1	0	0	0	0	0	0	1	0	1
1430796_at	BB057112	Trim14	tripartite motif-containing 14	1	1	0	1	1	1	0	0	1	6												1	1	Homologene group 13241	4	0	1	0	0	0	0	0	0	1	0	0	0	0	0	0	1	0	1
1454893_at	BB765852	1110013L07Rik	RIKEN cDNA 1110013L07 gene	1	0	1	1	1	1	0	0	1	6												1	0	Homologene group 4805	4	0	1	1	0	0	0	0	0	1	0	1	0	0	0	0	1	0	0
1434338_at	BQ085677	1110029E03Rik	RIKEN cDNA 1110029E03 gene	1	0	1	1	1	1	0	0	1	6
1458250_at	BB189202	---	---	1	0	1	1	1	1	0	0	1	6
1455471_at	AV333862	1500012D20Rik	RIKEN cDNA 1500012D20 gene	1	0	1	1	1	1	0	0	1	6
1453344_at	AK007675	1810032O08Rik	RIKEN cDNA 1810032O08 gene	1	0	1	1	1	1	0	0	1	6
1429203_at	AK010725	2410076I21Rik	RIKEN cDNA 2410076I21 gene	1	0	1	1	1	1	0	0	1	6													1	Homologene group 83546	5	0	0	1	0	0	0	0	0	1	0	1	0	0	0	0	1	0	1
1426820_at	BG065294	2610507B11Rik	RIKEN cDNA 2610507B11 gene	1	0	1	1	1	1	0	0	1	6												1	1	Homologene group 34730	8	1	1	1	1	0	0	1	0	1	0	0	0	0	0	0	1	0	1
1427141_at	BC002320	2700099C18Rik	RIKEN cDNA 2700099C18 gene	1	0	1	1	1	1	0	0	1	6
1452354_at	AK013367	2810459M11Rik	RIKEN cDNA 2810459M11 gene	1	0	1	1	1	1	0	0	1	6												1	1	Homologene group 54780	1	0	0	0	0	0	0	0	0	0	0	0	0	0	0	0	1	0	0
1428624_at	AK013434	2810482I07Rik	RIKEN cDNA 2810482I07 gene	1	0	1	1	1	1	0	0	1	6
1430459_at	AV370407	4632428C04Rik	RIKEN cDNA 4632428C04 gene	1	0	1	1	1	1	0	0	1	6
1451572_a_at	BC016597	5230400G24Rik	RIKEN cDNA 5230400G24 gene	1	0	1	1	1	1	0	0	1	6
1454418_at	AK019900	5330421C15Rik	RIKEN cDNA 5330421C15 gene	1	0	1	1	1	1	0	0	1	6
1436250_at	BM946369	5430405G05Rik	RIKEN cDNA 5430405G05 gene	1	0	1	1	1	1	0	0	1	6												1	1	Homologene group 10148	5	0	1	1	0	0	0	0	0	1	0	1	0	0	0	0	1	0	0
1460150_at	BE979371	Sh2d3c	SH2 domain containing 3C	1	0	1	1	1	1	0	0	1	6												1	1	Homologene group 69145	8	0	1	1	1	0	0	1	0	1	0	1	0	0	0	0	1	0	1
1457218_at	BB296225	6430510M02Rik	RIKEN cDNA 6430510M02 gene	1	0	1	1	1	1	0	0	1	6
1458982_at	BG070141	---	---	1	0	1	1	1	1	0	0	1	6
1420656_at	AF324495	Abcg8	ATP-binding cassette; sub-family G (WHITE); member 8	1	0	1	1	1	1	0	0	1	6												1	1	Homologene group 23361	11	0	1	1	0	1	0	0	0	1	0	1	0	1	1	1	1	1	1
1423999_at	J02995	Abl1	v-abl Abelson murine leukemia oncogene 1	1	0	1	1	1	1	0	0	1	6												1	1	Homologene group 3783	6	0	1	1	0	0	0	0	0	1	0	1	0	0	0	0	1	0	1
1424655_at	BB022890	Acp2	acid phosphatase 2; lysosomal	1	0	1	1	1	1	0	0	1	6												1	1	Homologene group 1217	9	1	1	1	1	0	0	1	0	1	0	1	0	0	0	0	1	0	1
1440859_at	BM122144	Akap6	A kinase (PRKA) anchor protein 6	1	0	1	1	1	1	0	0	1	6												1	1	Homologene group 3157	5	0	1	1	0	0	0	0	0	1	0	1	0	0	0	0	1	0	0
1417920_at	NM_033603	Amn	amnionless	1	0	1	1	1	1	0	0	1	6												1	1	Homologene group 12804	5	0	0	1	0	0	0	0	0	1	0	1	0	0	0	0	1	0	1
1425731_at	BC017633	Ankrd24	ankyrin repeat domain 24	1	0	1	1	1	1	0	0	1	6												1	1	Homologene group 49885	5	0	1	1	0	0	0	0	0	1	0	1	0	0	0	0	0	0	1
1424759_at	BC017528	Arrdc4	arrestin domain containing 4	1	0	1	1	1	1	0	0	1	6												1	1	Homologene group 41636	5	0	1	1	0	0	0	0	0	1	0	0	0	0	0	0	1	0	1
1417361_at	BC023086	Asb3	ankyrin repeat and SOCS box-containing protein 3	1	0	1	1	1	1	0	0	1	6												1	1	Homologene group 9391	6	0	1	1	0	0	0	0	0	1	0	1	0	0	0	0	1	0	1
1435019_at	BB532141	Atxn7l3	ataxin 7-like 3	1	0	1	1	1	1	0	0	1	6
1439304_at	BM242340	B230216N24Rik	RIKEN cDNA B230216N24 gene	1	0	1	1	1	1	0	0	1	6
1435648_at	BB325766	B430119L13Rik	RIKEN cDNA B430119L13 gene	1	0	1	1	1	1	0	0	1	6
1460064_at	BM237812	BC028789	cDNA sequence BC028789	1	0	1	1	1	1	0	0	1	6
1434018_at	BM120580	BC043098	cDNA sequence BC043098	1	0	1	1	1	1	0	0	1	6
1456257_at	BG070093	C130065N10Rik	RIKEN cDNA C130065N10 gene	1	0	1	1	1	1	0	0	1	6
1445890_at	BB381460	C230079E05Rik	RIKEN cDNA C230079E05 gene	1	0	1	1	1	1	0	0	1	6
1425776_a_at	BC025632	C87436	expressed sequence C87436	1	0	1	1	1	1	0	0	1	6												1	1	Homologene group 9897	7	0	1	1	1	0	0	0	0	1	0	1	0	0	0	0	1	0	1
1449234_at	NM_030558	Car15	carbonic anhydrase 15	1	0	1	1	1	1	0	0	1	6													0	Homologene group 113791	1	0	1	1	0	0	0	0	0	0	0	0	0	0	0	0	0	0	0
1422875_at	NM_013489	Cd84	CD84 antigen	1	0	1	1	1	1	0	0	1	6												1	1	Homologene group 48249	4	0	1	1	0	0	0	0	0	1	0	0	0	0	0	0	1	0	0
1421963_a_at	NM_023117	Cdc25b	cell division cycle 25 homolog B (S. cerevisiae)	1	0	1	1	1	1	0	0	1	6												1	1	Homologene group 41451	5	0	1	1	0	0	0	0	0	1	0	1	0	0	0	0	1	0	0
1433556_at	AV264037	Centa1	centaurin; alpha 1	1	0	1	1	1	1	0	0	1	6
1433733_a_at	BG069864	Cry1	cryptochrome 1 (photolyase-like)	1	0	1	1	1	1	0	0	1	6												1	1	Homologene group 7042	6	0	1	1	0	0	0	1	0	1	0	0	0	0	0	0	1	0	1
1434747_at	BI963522	Ctrc	chymotrypsin C (caldecrin)	1	0	1	1	1	1	0	0	1	6												1	1	Homologene group 21422	7	0	1	1	1	0	0	1	0	1	0	0	0	0	0	0	1	0	1
1417868_a_at	NM_022325	Ctsz	cathepsin Z	1	0	1	1	1	1	0	0	1	6												1	1	Homologene group 1022	6	1	1	0	0	0	0	0	0	1	0	1	0	0	0	0	1	0	1
1434245_a_at	BB218627	Cybasc3	cytochrome b; ascorbate dependent 3	1	0	1	1	1	1	0	0	1	6												1	1	Homologene group 15558	7	0	1	1	0	0	0	0	0	1	0	1	0	1	0	0	0	1	1
1415753_at	BC005632	D10Bwg1364e	DNA segment; Chr 10; Brigham & Women's Genetics 1364 expressed	1	0	1	1	1	1	0	0	1	6
1453480_at	AI315206	D630002J15Rik	RIKEN cDNA D630002J15 gene	1	0	1	1	1	1	0	0	1	6
1458948_at	BB798482	D630013N20Rik	RIKEN cDNA D630013N20 gene	1	0	1	1	1	1	0	0	1	6
1454624_at	AV260555	B930096L08Rik	RIKEN cDNA B930096L08 gene	1	0	1	1	1	1	0	0	1	6
1455311_at	BB523554	Dgcr8	DiGeorge syndrome critical region gene 8	1	0	1	1	1	1	0	0	1	6												1	1	Homologene group 11223	9	1	1	1	1	0	0	1	0	1	0	1	0	0	0	0	1	0	1
1416288_at	BF141076	Dnaja1	DnaJ (Hsp40) homolog; subfamily A; member 1	1	0	1	1	1	1	0	0	1	6												1	1	Homologene group 55588	8	1	0	1	0	0	0	0	1	1	0	1	0	0	0	0	1	1	1
1422246_at	NM_010080	Dspp	dentin sialophosphoprotein	1	0	1	1	1	1	0	0	1	6												1	0	Homologene group 56286	8	0	1	1	1	0	0	1	0	1	0	1	1	0	0	1	0	0	1
1435044_at	BB333883	Ebf4	early B-cell factor 4	1	0	1	1	1	1	0	0	1	6												1	0	Homologene group 65064	2	0	1	1	0	0	0	0	0	1	0	0	0	0	0	0	0	0	0
1416268_at	BC005486	Ets2	E26 avian leukemia oncogene 2; 3' domain	1	0	1	1	1	1	0	0	1	6												1	1	Homologene group 3838	6	0	1	1	0	0	0	0	0	1	0	1	0	0	0	0	1	0	1
1423708_a_at	BC016428	Farslb	phenylalanine-tRNA synthetase-like; beta subunit	1	0	1	1	1	1	0	0	1	6
1417969_at	NM_133765	Fbxo31	F-box only protein 31	1	0	1	1	1	1	0	0	1	6												1
1424599_at	BC021946	Fgl1	fibrinogen-like protein 1	1	0	1	1	1	1	0	0	1	6												1	1	Homologene group 37927	6	0	1	1	0	0	0	0	0	1	0	1	0	0	0	0	1	0	1
1421661_at	NM_008042	Fprl1	formyl peptide receptor-like 1	1	0	1	1	1	1	0	0	1	6
1458904_at	BB822564	---	---	1	0	1	1	1	1	0	0	1	6
1419428_a_at	NM_008064	Gaa	glucosidase; alpha; acid	1	0	1	1	1	1	0	0	1	6												1	1	Homologene group 37268	10	0	1	1	0	0	1	0	0	1	1	1	0	1	0	0	1	1	1
1426547_at	AI195150	Gc	group specific component	1	0	1	1	1	1	0	0	1	6												1	1	Homologene group 486	6	0	1	1	0	0	0	0	0	1	0	1	0	0	0	0	1	0	1
1426059_at	BC012412	Gckr	glucokinase regulatory protein	1	0	1	1	1	1	0	0	1	6												1	0	Homologene group 1139	3	0	1	0	0	0	0	0	0	1	0	1	0	0	0	0	1	0	0
1451429_at	BC013623	5730466C23Rik	RIKEN cDNA 5730466C23 gene	1	0	1	1	1	1	0	0	1	6
1454082_a_at	AK010828	2410170E21Rik	RIKEN cDNA 2410170E21 gene	1	0	1	1	1	1	0	0	1	6
1426579_at	BM199850	Gnl2	guanine nucleotide binding protein-like 2 (nucleolar)	1	0	1	1	1	1	0	0	1	6												1	1	Homologene group 6858	16	1	1	1	1	1	1	0	0	1	1	1	1	1	1	1	1	1	1
1449113_at	NM_030247	5330440M15Rik	RIKEN cDNA 5330440M15 gene	1	0	1	1	1	1	0	0	1	6
1428736_at	AV259880	9130427A09Rik	RIKEN cDNA 9130427A09 gene	1	0	1	1	1	1	0	0	1	6
1448429_at	NM_013755	Gyg1	glycogenin 1	1	0	1	1	1	1	0	0	1	6
1425643_at	M26385	Gypa	glycophorin A	1	0	1	1	1	1	0	0	1	6												1
1437974_a_at	BB713410	Hk1	hexokinase 1	1	0	1	1	1	1	0	0	1	6												1	1	Homologene group 100530	14	0	1	0	1	1	1	0	0	1	1	1	1	1	1	1	1	1	1
1452109_at	BG973910	Il17re	interleukin 17 receptor E	1	0	1	1	1	1	0	0	1	6												1	1	Homologene group 17109	4	0	1	1	0	0	0	0	0	1	0	0	0	0	0	0	1	0	0
1434259_at	AV267027	---	---	1	0	1	1	1	1	0	0	1	6
1450906_at	BB476707	Plxnc1	plexin C1	1	0	1	1	1	1	0	0	1	6												1	1	Homologene group 4211	5	0	0	1	0	0	0	0	0	1	0	1	0	0	0	0	1	0	1
1432027_a_at	AK013092	Tbc1d14	TBC1 domain family; member 14	1	0	1	1	1	1	0	0	1	6												1	0	Homologene group 10809	6	1	1	1	0	0	0	0	0	1	0	1	0	0	0	0	1	0	1
1434478_at	BE447663	Heca	headcase homolog (Drosophila)	1	0	1	1	1	1	0	0	1	6												1	1	Homologene group 32300	6	0	1	1	0	0	0	0	0	1	0	1	0	0	0	0	1	0	1
1453673_at	AV248422	Atp13a4	ATPase type 13A4	1	0	1	1	1	1	0	0	1	6												1	1	Homologene group 75330	5	0	1	1	0	0	0	0	0	1	0	0	0	0	0	0	1	0	1
1456659_at	BM116906	Arid1b	AT rich interactive domain 1B (Swi1 like)	1	0	1	1	1	1	0	0	1	6												1	0	Homologene group 32344	7	1	1	1	0	0	0	1	0	1	0	1	0	0	0	0	1	0	1
1418449_at	NM_133664	Lad1	ladinin	1	0	1	1	1	1	0	0	1	6												1	0	Homologene group 4059	4	0	1	1	0	0	0	0	0	1	0	0	0	0	0	0	1	0	1
1432468_at	AK020305	Lcn9	lipocalin 9	1	0	1	1	1	1	0	0	1	6												1	1	Homologene group 12681	3	0	1	1	0	0	0	0	0	1	0	0	0	0	0	0	0	0	0
1455260_at	BE650208	MGI:2651932	Mblk1-related protein-1	1	0	1	1	1	1	0	0	1	6
1455754_at	BQ043839	---	---	1	0	1	1	1	1	0	0	1	6
1421769_at	NM_010725	Lmx1b	LIM homeobox transcription factor 1 beta	1	0	1	1	1	1	0	0	1	6												1	1	Homologene group 55648	8	1	1	1	1	0	0	0	0	1	0	1	0	0	0	0	1	0	1
1416826_a_at	NM_020048	Usp49	ubiquitin specific protease 49	1	0	1	1	1	1	0	0	1	6												1	1	Homologene group 10235	6	0	1	1	0	0	0	0	0	1	0	1	0	0	0	0	1	0	1
1441075_at	AW541389	LOC329416	nitric oxide synthase trafficker	1	0	1	1	1	1	0	0	1	6
1428049_a_at	BC028494	1110001K21Rik	RIKEN cDNA 1110001K21 gene	1	0	1	1	1	1	0	0	1	6
1425119_at	BC012877	Oas1b	2'-5' oligoadenylate synthetase 1B	1	0	1	1	1	1	0	0	1	6
1428768_at	AK012409	2700050F09Rik	RIKEN cDNA 2700050F09 gene	1	0	1	1	1	1	0	0	1	6
1416780_at	NM_021514	Pfkm	phosphofructokinase; muscle	1	0	1	1	1	1	0	0	1	6												1	1	Homologene group 20101	6	0	1	1	0	0	0	0	0	1	0	1	0	0	0	0	1	0	1
1428714_at	BF322962	Pgrmc2	progesterone receptor membrane component 2	1	0	1	1	1	1	0	0	1	6												1	1	Homologene group 38169	6	0	1	1	0	0	0	0	0	1	0	1	0	0	0	0	1	0	1
1427466_at	BC013076	Cdc91l1	CDC91 cell division cycle 91-like 1 (S. cerevisiae)	1	0	1	1	1	1	0	0	1	6
1417990_at	NM_028104	Ppp1r14d	protein phosphatase 1; regulatory (inhibitor) subunit 14D	1	0	1	1	1	1	0	0	1	6												1	1	Homologene group 9800	5	0	1	1	0	0	0	0	0	1	0	0	0	0	0	0	1	0	1
1448633_at	NM_027328	Prpf31	PRP31 pre-mRNA processing factor 31 homolog (yeast)	1	0	1	1	1	1	0	0	1	6												1	1	Homologene group 5980	13	1	1	1	1	0	1	1	0	1	1	1	0	1	1	0	1	1	0
1460437_at	AK010908	Pscd4	pleckstrin homology; Sec7 and coiled/coil domains 4	1	0	1	1	1	1	0	0	1	6
1416945_at	NM_133949	Ptov1	prostate tumor over expressed gene 1	1	0	1	1	1	1	0	0	1	6												1	1	Homologene group 9687	4	0	1	1	1	0	0	0	0	1	0	0	0	0	0	0	0	0	0
1426581_at	BI247018	2810004N20Rik	RIKEN cDNA 2810004N20 gene	1	0	1	1	1	1	0	0	1	6
1448673_at	NM_021495	Pvrl3	poliovirus receptor-related 3	1	0	1	1	1	1	0	0	1	6												1	1	Homologene group 9162	5	0	0	1	0	0	0	0	0	1	0	1	0	0	0	0	1	0	1
1434669_at	BM247829	---	---	1	0	1	1	1	1	0	0	1	6
1456027_at	AV315180	---	Transcribed locus	1	0	1	1	1	1	0	0	1	6
1450243_a_at	NM_030598	Dscr1l1	Down syndrome critical region gene 1-like 1	1	0	1	1	1	1	0	0	1	6
1416962_at	NM_133878	Chc1	chromosome condensation 1	1	0	1	1	1	1	0	0	1	6
1432144_a_at	AK015870	Rchy1	ring finger and CHY zinc finger domain containing 1	1	0	1	1	1	1	0	0	1	6												1	1	Homologene group 22894	12	0	1	1	1	0	0	1	0	1	1	1	0	1	1	0	1	1	1
1434956_at	AV145226	6720407G21Rik	RIKEN cDNA 6720407G21 gene	1	0	1	1	1	1	0	0	1	6
1427132_at	BG242242	Mtmr13	myotubularin related protein 13	1	0	1	1	1	1	0	0	1	6
1455678_at	AW542299	Sema4b	sema domain; immunoglobulin domain (Ig); transmembrane domain (TM) and short cytoplasmic domain; (semaphorin) 4B	1	0	1	1	1	1	0	0	1	6												1	1	Homologene group 8426	6	0	1	1	0	0	0	0	0	1	0	1	0	0	0	0	1	0	1
1416702_at	NM_009250	Serpini1	serine (or cysteine) proteinase inhibitor; clade I; member 1	1	0	1	1	1	1	0	0	1	6												1	1	Homologene group 21045	8	0	1	1	1	0	0	1	0	1	0	1	0	0	0	0	1	0	1
1415893_at	NM_009163	Sgpl1	sphingosine phosphate lyase 1	1	0	1	1	1	1	0	0	1	6												1	1	Homologene group 2897	15	1	1	1	1	1	0	1	0	1	1	1	0	1	1	1	1	1	1
1451267_at	BC016203	0610041B22Rik	RIKEN cDNA 0610041B22 gene	1	0	1	1	1	1	0	0	1	6
1418751_at	NM_019436	MGI:1889342	SHP2 interacting transmembrane adaptor	1	0	1	1	1	1	0	0	1	6
1417600_at	NM_021301	Slc15a2	solute carrier family 15 (H+/peptide transporter); member 2	1	0	1	1	1	1	0	0	1	6												1	1	Homologene group 56912	12	1	1	1	0	1	1	1	0	1	0	1	0	1	0	1	1	0	1
1448385_at	NM_133895	Slc15a4	solute carrier family 15; member 4	1	0	1	1	1	1	0	0	1	6												1	1	Homologene group 26432	7	0	1	1	0	0	0	0	0	1	0	1	0	0	0	0	1	1	1
1455285_at	BB771765	Slc31a1	solute carrier family 31; member 1	1	0	1	1	1	1	0	0	1	6												1	1	Homologene group 1399	8	0	1	1	1	0	0	1	0	1	0	1	0	0	0	0	1	0	1
1452492_a_at	BC022752	Slc37a2	solute carrier family 37 (glycerol-3-phosphate transporter); member 2	1	0	1	1	1	1	0	0	1	6												1	1	Homologene group 41357	9	0	1	1	1	0	0	1	0	1	0	1	0	1	0	0	0	1	1
1424424_at	BC005474	Slc39a1	solute carrier family 39 (zinc transporter); member 1	1	0	1	1	1	1	0	0	1	6												1	1	Homologene group 40906	8	1	1	1	1	0	0	1	0	1	0	1	0	0	0	0	1	0	0
1436611_at	AW046938	Slc39a12	RIKEN cDNA C030041M11 gene	1	0	1	1	1	1	0	0	1	6												1	1	Homologene group 17654	5	0	1	1	0	0	0	0	0	1	0	0	0	0	0	0	1	0	1
1454777_at	BB553107	Slco2b1	solute carrier organic anion transporter family; member 2b1	1	0	1	1	1	1	0	0	1	6												1	1	Homologene group 21419	5	0	1	1	0	0	0	0	0	1	0	0	0	0	0	0	1	0	1
1418467_at	NM_025891	Smarcd3	SWI/SNF related; matrix associated; actin dependent regulator of chromatin; subfamily d; member 3	1	0	1	1	1	1	0	0	1	6												1	1	Homologene group 2314	10	1	1	1	1	0	1	1	0	1	0	1	0	0	0	0	1	0	1
1418493_a_at	NM_009221	Snca	synuclein; alpha	1	0	1	1	1	1	0	0	1	6												1	1	Homologene group 293	5	0	1	1	0	0	0	0	0	1	0	0	0	0	0	0	1	0	1
1451008_at	BB360510	St8sia3	ST8 alpha-N-acetyl-neuraminide alpha-2;8-sialyltransferase 3	1	0	1	1	1	1	0	0	1	6												1	1	Homologene group 8285	6	0	1	1	0	0	0	0	0	1	0	1	0	0	0	0	1	0	1
1416861_at	NM_011484	Stam	signal transducing adaptor molecule (SH3 domain and ITAM motif) 1	1	0	1	1	1	1	0	0	1	6												1	1	Homologene group 37788	15	1	1	1	1	1	1	1	0	1	1	1	1	0	1	1	1	0	1
1421812_at	AF043943	---	---	1	0	1	1	1	1	0	0	1	6
1429354_at	AK003517	1110038F21Rik	RIKEN cDNA 1110038F21 gene	1	0	1	1	1	1	0	0	1	6
1449886_a_at	NM_013896	Timm10	translocase of inner mitochondrial membrane 10 homolog (yeast)	1	0	1	1	1	1	0	0	1	6												1	1	Homologene group 40845	9	1	1	1	1	0	0	1	0	1	0	1	0	0	0	0	1	0	1
1452666_a_at	AK004359	Tmcc2	transmembrane and coiled-coil domains 2	1	0	1	1	1	1	0	0	1	6												1	1	Homologene group 8905	9	1	1	1	1	0	0	1	0	1	0	1	0	0	0	0	1	0	1
1434783_at	BM222050	D15Ertd405e	DNA segment; Chr 15; ERATO Doi 405; expressed	1	0	1	1	1	1	0	0	1	6
1452134_at	BB398778	3010001K23Rik	RIKEN cDNA 3010001K23 gene	1	0	1	1	1	1	0	0	1	6
1431455_at	AK016597	4933401B01Rik	RIKEN cDNA 4933401B01 gene	1	0	1	1	1	1	0	0	1	6
1456684_at	BB710790	B230382K22Rik	RIKEN cDNA B230382K22 gene	1	0	1	1	1	1	0	0	1	6
1430483_a_at	AK010144	2310042N02Rik	RIKEN cDNA 2310042N02 gene	1	0	1	1	1	1	0	0	1	6
1427260_a_at	X53753	Tpm3	tropomyosin 3; gamma	1	0	1	1	1	1	0	0	1	6												1	1	Homologene group 81889	6	1	1	0	0	0	0	1	0	1	0	1	0	0	0	0	1	0	0
1449623_at	AI196535	Txnrd3	thioredoxin reductase 3	1	0	1	1	1	1	0	0	1	6												1	1	Homologene group 60033	6	0	1	1	0	0	0	0	0	1	0	1	0	0	0	0	1	0	1
1434237_at	BQ084786	Upk3b	uroplakin 3B	1	0	1	1	1	1	0	0	1	6												1	1	Homologene group 18435	4	0	1	1	0	0	0	0	0	1	0	0	0	0	0	0	1	0	0
1435901_at	AV226197	---	---	1	0	1	1	1	1	0	0	1	6
1416989_at	NM_026664	3100002B05Rik	RIKEN cDNA 3100002B05 gene	1	0	1	1	1	1	0	0	1	6
1434134_at	BB123403	Wdr42a	WD repeat domain 42A	1	0	1	1	1	1	0	0	1	6												1	1	Homologene group 56725	9	0	1	1	1	0	0	1	0	1	0	1	0	1	0	0	1	1	0
1437484_at	AI267092	Zbtb5	zinc finger and BTB domain containing 5	1	0	1	1	1	1	0	0	1	6												1	1	Homologene group 8913	5	0	1	1	0	0	0	0	0	1	0	1	0	0	0	0	0	0	1
1456771_at	AW109834	C230075L19Rik	RIKEN cDNA C230075L19 gene	1	0	1	1	1	1	0	0	1	6
1439503_at	BI735871	Zfp28	zinc finger protein 28	1	0	1	1	1	1	0	0	1	6												1	1	Homologene group 69047	4	0	1	1	0	0	0	0	0	1	0	0	0	0	0	0	1	0	0
1435615_at	BB277790	Zfp365	zinc finger protein 365	1	0	1	1	1	1	0	0	1	6												1	1	Homologene group 8975	6	0	1	1	0	0	0	0	0	1	0	1	0	0	0	0	1	0	1
1452689_at	AK010855	Zfp512	zinc finger protein 512	1	0	1	1	1	1	0	0	1	6												1	1	Homologene group 13026	6	0	1	1	0	0	0	0	0	1	0	1	0	0	0	0	1	0	1
1424384_a_at	BC006765	Znrf1	zinc and ring finger 1	1	0	1	1	1	1	0	0	1	6												1	1	Homologene group 41858	2	0	0	0	0	0	0	0	0	1	0	1	0	0	0	0	0	0	0
1430685_at	AK018206	6330503C03Rik	RIKEN cDNA 6330503C03 gene	1	1	1	1	1	0	0	0	1	6
1454503_at	AK020241	9030201C23Rik	RIKEN cDNA 9030201C23 gene	1	1	1	1	1	0	0	0	1	6
1455199_at	BB667176	LOC434302	LOC434302	1	1	1	1	1	0	0	0	1	6
1446036_at	BG069308	4930588A03Rik	RIKEN cDNA 4930588A03 gene	1	1	1	1	1	0	0	0	1	6
1460559_at	BB038765	---	---	1	1	1	1	1	0	0	0	1	6
1451665_a_at	BC001985	Ap4s1	adaptor-related protein complex AP-4; sigma 1	1	1	1	1	1	0	0	0	1	6												1	1	Homologene group 32513	7	0	1	0	0	0	0	0	1	0	0	1	0	1	0	0	1	1	1
1460439_at	AK017789	BC033915	cDNA sequence BC033915	1	1	1	1	1	0	0	0	1	6												1	1	Homologene group 57023	7	0	1	0	1	0	0	1	0	1	0	1	0	0	0	0	1	0	1
1435965_at	AI481951	Cnot3	CCR4-NOT transcription complex; subunit 3	1	1	1	1	1	0	0	0	1	6												1	1	Homologene group 7149	14	1	1	1	1	0	1	1	1	1	1	1	0	1	1	0	1	1	0
1459394_at	BB457443	D130052B06Rik	RIKEN cDNA D130052B06 gene	1	1	1	1	1	0	0	0	1	6
1431004_at	AI415741	Loxl2	lysyl oxidase-like 2	1	1	1	1	1	0	0	0	1	6												1	1	Homologene group 1742	7	0	1	1	1	0	0	1	0	1	0	1	0	0	0	0	1	0	0
1432156_a_at	AK012288	Rnf32	ring finger protein 32	1	1	1	1	1	0	0	0	1	6												1	0	Homologene group 10986	4	0	1	0	0	0	0	0	0	1	0	1	0	0	0	0	1	0	1
1453502_at	AK008859	2210408I21Rik	RIKEN cDNA 2210408I21 gene	1	1	1	1	0	1	0	0	1	6												1	1	Homologene group 89234	4	0	0	1	0	0	0	0	0	1	0	1	0	0	0	0	1	0	0
1442297_at	BB212172	BB212172	Expressed sequence BB212172	1	1	1	1	0	1	0	0	1	6
1434116_at	BI693188	Cbx2	chromobox homolog 2 (Drosophila Pc class)	1	1	1	1	0	1	0	0	1	6												1	1	Homologene group 7256	5	0	1	1	0	0	0	0	0	1	0	1	0	0	0	0	0	0	1
1429774_a_at	AK014420	3830405G04Rik	RIKEN cDNA 3830405G04 gene	1	1	1	1	0	1	0	0	1	6
1449899_at	NM_130455	Grin3b	glutamate receptor; ionotropic; NMDA3B	1	1	1	1	0	1	0	0	1	6												1	1	Homologene group 15606	4	0	1	1	0	0	0	0	0	1	0	1	0	0	0	0	0	0	0
1418939_at	NM_008250	Hlx1	H2.0-like homeo box 1 (Drosophila)	1	1	1	1	0	1	0	0	1	6
1427935_at	AA250510	2610208E05Rik	RIKEN cDNA 2610208E05 gene	1	1	1	1	0	1	0	0	1	6
1448777_at	NM_008564	Mcm2	minichromosome maintenance deficient 2 mitotin (S. cerevisiae)	1	1	1	1	0	1	0	0	1	6												1	1	Homologene group 3325	17	1	1	1	1	1	1	1	0	1	1	1	1	1	1	1	1	1	1
1419348_at	BC010288	Psp	parotid secretory protein	1	1	1	1	0	1	0	0	1	6												1	1	Homologene group 69034	4	0	1	1	0	0	0	0	0	1	0	0	0	0	0	0	1	0	0
1420925_at	NM_021885	E130307J04Rik	RIKEN cDNA E130307J04 gene	1	1	1	1	0	1	0	0	1	6
1444214_at	AW493179	2810484G07Rik	RIKEN cDNA 2810484G07 gene	1	1	1	1	0	1	0	0	1	6
1425696_at	BC021911	Txnl6	thioredoxin-like 6	1	1	1	1	0	1	0	0	1	6
1432367_a_at	AK012543	Ufd1l	ubiquitin fusion degradation 1 like	1	1	1	1	0	1	0	0	1	6												1	0	Homologene group 39090	14	1	0	1	1	1	1	1	0	1	1	1	1	1	1	1	0	1	1
1435175_at	BI738434	BC034090	cDNA sequence BC034090	0	1	1	1	1	1	0	0	1	6												1	1	Homologene group 19490	1	0	0	0	0	0	0	0	0	1	0	0	0	0	0	0	0	0	0
1415785_a_at	NM_009840	Cct8	chaperonin subunit 8 (theta)	0	1	1	1	1	1	0	0	1	6												1	1	Homologene group 4802	17	1	1	1	1	1	1	1	0	1	1	1	1	1	1	1	1	1	1
1449820_at	NM_007745	Cort	cortistatin	0	1	1	1	1	1	0	0	1	6												1	1	Homologene group 997	2	0	0	1	0	0	0	0	0	1	0	0	0	0	0	0	0	0	0
1441174_a_at	BB182358	Lmln	leishmanolysin-like (metallopeptidase M8 family)	0	1	1	1	1	1	0	0	1	6												1	0	Homologene group 13198	5	1	1	1	1	0	0	1	0	0	0	0	0	0	0	0	1	0	0
1427987_at	BM239918	Safb2	scaffold attachment factor B2	0	1	1	1	1	1	0	0	1	6												1	1	Homologene group 35210	5	0	1	0	0	0	0	0	0	1	0	1	0	0	0	0	1	0	1
1435141_at	AV238378	2010005O13Rik	RIKEN cDNA 2010005O13 gene	0	1	1	1	1	1	0	0	1	6
1435195_at	BG076358	D930046M13Rik	RIKEN cDNA D930046M13 gene	0	1	1	1	1	1	0	0	1	6
1424872_at	BC012405	---	Adult male olfactory brain cDNA; RIKEN full-length enriched library; clone:6430503O15 product:MSZF33 (FRAGMENT) homolog [Mus musculus]; full insert sequence	1	1	1	1	1	1	0	0	0	6
1453177_at	BB739558	4631426E05Rik	RIKEN cDNA 4631426E05 gene	1	1	1	1	1	1	0	0	0	6
1433009_at	AK018539	9030607J07Rik	RIKEN cDNA 9030607J07 gene	1	1	1	1	1	1	0	0	0	6
1454528_at	AK020846	A930011E06Rik	RIKEN cDNA A930011E06 gene	1	1	1	1	1	1	0	0	0	6
1451388_a_at	BC026741	Atp11b	ATPase; Class VI; type 11B	1	1	1	1	1	1	0	0	0	6												1	1	Homologene group 32919	9	0	1	1	1	0	0	1	0	1	0	1	0	1	0	0	0	1	1
1417799_at	BC020190	Atp6v1g2	ATPase; H+ transporting; V1 subunit G isoform 2	1	1	1	1	1	1	0	0	0	6												1	1	Homologene group 41518	4	0	1	1	0	0	0	0	0	1	0	0	0	0	0	0	1	0	0
1457802_at	AW545180	B930012P20Rik	RIKEN cDNA B930012P20 gene	1	1	1	1	1	1	0	0	0	6
1425306_at	BC027072	BC027072	cDNA sequence BC027072	1	1	1	1	1	1	0	0	0	6												1	1	Homologene group 19792	5	0	0	1	0	0	0	0	0	1	0	1	0	0	0	0	1	0	1
1439788_at	AV025195	MGC86034	hypothetical MGC86034	1	1	1	1	1	1	0	0	0	6
1424121_at	AB076722	Commd1	COMM domain containing 1	1	1	1	1	1	1	0	0	0	6												1	1	Homologene group 17604	5	0	1	0	0	0	0	0	0	1	0	1	0	0	0	0	1	0	1
1417960_at	NM_007755	Cpeb1	cytoplasmic polyadenylation element binding protein 1	1	1	1	1	1	1	0	0	0	6												1	1	Homologene group 7278	5	0	0	1	0	0	0	0	0	1	0	1	0	0	0	0	1	0	1
1427537_at	BC026387	Eppk1	epiplakin 1	1	1	1	1	1	1	0	0	0	6												1	0	Homologene group 20006	4	0	1	1	0	0	0	0	0	1	0	1	0	0	0	0	1	0	0
1455942_at	BB448023	Fbxl11	F-box and leucine-rich repeat protein 11	1	1	1	1	1	1	0	0	0	6												1	1	Homologene group 56564	7	0	1	1	1	0	0	1	0	1	0	0	0	0	0	0	1	0	1
1450508_at	NM_008238	Foxn1	forkhead box N1	1	1	1	1	1	1	0	0	0	6												1	1	Homologene group 2664	6	0	1	1	0	0	0	0	0	1	0	1	0	0	0	0	1	0	1
1435638_at	BG808297	---	---	1	1	1	1	1	1	0	0	0	6
1417973_at	NM_008406	Itih1	inter-alpha trypsin inhibitor; heavy chain 1	1	1	1	1	1	1	0	0	0	6												1	1	Homologene group 1667	4	0	1	1	0	0	0	0	0	1	0	0	0	0	0	0	1	0	0
1460211_a_at	NM_133950	Kdelr1	KDEL (Lys-Asp-Glu-Leu) endoplasmic reticulum protein retention receptor 1	1	1	1	1	1	1	0	0	0	6												1	1	Homologene group 86772	5	1	1	1	0	0	0	0	0	1	0	0	0	0	0	0	1	0	0
1424788_at	BC021438	BC021438	cDNA sequence BC021438	1	1	1	1	1	1	0	0	0	6
1448791_at	NM_024225	Snx5	sorting nexin 5	1	1	1	1	1	1	0	0	0	6												1	1	Homologene group 40944	7	1	1	1	0	0	0	0	0	1	0	1	0	0	0	0	1	0	1
1419844_a_at	BE627741	---	---	1	1	1	1	1	1	0	0	0	6
1418785_at	AF220195	Mapk8ip2	mitogen-activated protein kinase 8 interacting protein 2	1	1	1	1	1	1	0	0	0	6												1	1	Homologene group 8201	5	0	1	1	0	0	0	0	0	1	0	1	0	0	0	0	1	0	0
1423147_at	AW551830	Mat1a	methionine adenosyltransferase I; alpha	1	1	1	1	1	1	0	0	0	6												1	1	Homologene group 68057	9	0	1	1	0	0	0	0	1	1	0	1	0	1	0	0	1	1	1
1418155_at	NM_021484	Ttid	titin immunoglobulin domain protein (myotilin)	1	1	1	1	1	1	0	0	0	6
1416056_a_at	BC027265	Np15	nuclear protein 15.6	1	1	1	1	1	1	0	0	0	6
1433519_at	AV123899	8430423A01Rik	RIKEN cDNA 8430423A01 gene	1	1	1	1	1	1	0	0	0	6
1426752_at	BG065238	Phf17	PHD finger protein 17	1	1	1	1	1	1	0	0	0	6												1	0	Homologene group 18162	4	0	1	1	0	0	0	0	0	1	0	1	0	0	0	0	1	0	0
1456871_a_at	BE956921	Phf20l1	PHD finger protein 20-like 1	1	1	1	1	1	1	0	0	0	6												1	1	Homologene group 9341	5	0	1	1	0	0	0	0	0	1	0	0	0	0	0	0	1	0	1
1427492_at	AF408412	Pof1b	premature ovarian failure 1B	1	1	1	1	1	1	0	0	0	6												1	0	Homologene group 11785	5	0	1	1	0	0	0	0	0	1	0	1	0	0	0	0	1	0	1
1435341_at	BG075790	Ppig	peptidyl-prolyl isomerase G (cyclophilin G)	1	1	1	1	1	1	0	0	0	6													1	Homologene group 3520	8	1	1	1	0	0	0	1	0	1	0	1	0	0	0	0	1	0	1
1417073_a_at	NM_021881	Qk	quaking	1	1	1	1	1	1	0	0	0	6													1	Homologene group 11059	6	1	1	1	0	0	0	0	0	1	0	1	0	0	0	0	0	0	1
1440319_at	BM194786	Gm817	gene model 817; (NCBI)	1	1	1	1	1	1	0	0	0	6
1421242_at	AI414399	Rnf144	ring finger protein 144	1	1	1	1	1	1	0	0	0	6
1420444_at	NM_011395	Slc22a3	solute carrier family 22 (organic cation transporter); member 3	1	1	1	1	1	1	0	0	0	6												1	0	Homologene group 22630	4	0	1	1	0	0	0	0	0	1	0	0	0	0	0	0	1	0	1
1426180_a_at	U82380	Smr2	submaxillary gland androgen regulated protein 2	1	1	1	1	1	1	0	0	0	6
1418089_at	NM_018768	Stx8	syntaxin 8	1	1	1	1	1	1	0	0	0	6												1	1	Homologene group 37973	8	0	1	1	1	0	0	1	0	1	0	1	0	0	0	0	1	0	1
1450683_at	NM_019754	Tagln3	transgelin 3	1	1	1	1	1	1	0	0	0	6												1	1	Homologene group 22337	9	1	1	1	1	0	0	1	0	1	0	1	0	0	0	0	1	0	1
1450461_at	NM_009331	Tcf7	transcription factor 7; T-cell specific	1	1	1	1	1	1	0	0	0	6												1	1	Homologene group 2410	5	0	1	1	0	0	0	1	0	1	0	0	0	0	0	0	1	0	0
1451344_at	BC025600	BC025600	cDNA sequence BC025600	1	1	1	1	1	1	0	0	0	6
1425635_at	AF307746	Tnk1	tyrosine kinase; non-receptor; 1	1	1	1	1	1	1	0	0	0	6												1	1	Homologene group 2966	4	0	1	1	0	0	0	0	0	1	0	0	0	0	0	0	1	0	0
1416118_at	NM_025863	---	---	1	1	1	1	1	1	0	0	0	6
1454006_a_at	AK016964	D0H8S2298E	DNA segment; Human S2298E	1	1	1	1	1	1	0	0	0	6
1435099_at	BF225689	Utp14a	UTP14; U3 small nucleolar ribonucleoprotein; homolog A (yeast)	1	1	1	1	1	1	0	0	0	6												1	1	Homologene group 38211	16	1	1	1	1	1	1	1	0	1	1	1	1	1	1	1	0	1	1
1452770_at	AK003237	Vkorc1	vitamin K epoxide reductase complex; subunit 1	1	1	1	1	1	1	0	0	0	6												1	1	Homologene group 11416	5	0	1	1	1	0	0	0	0	1	0	1	0	0	0	0	0	0	0
1436675_at	AU043001	4931433A13Rik	RIKEN cDNA 4931433A13 gene	1	1	1	1	1	1	0	0	0	6
1452945_at	AK011480	2610020C11Rik	RIKEN cDNA 2610020C11 gene	1	1	1	1	1	1	0	0	0	6
1427120_at	AV346442	Zfp26	zinc finger protein 26	1	1	1	1	1	1	0	0	0	6													1	Homologene group 105657	3	0	0	1	0	0	0	0	0	1	0	0	0	0	0	0	1	0	0
1452318_a_at	M12573	Hspa1b	heat shock protein 1B	1	0	0	1	1	0	1	1	1	6					HSPA1B	Heat shock 70 kDa protein 1 (HSP70.1) (HSP70-1/HSP70-2).	26	0.000230659	0	1	1	1
1427718_a_at	X58876	Mdm2	transformed mouse 3T3 cell double minute 2	0	0	0	1	1	1	1	1	1	6					MDM2	E3 ubiquitin-protein ligase Mdm2 (EC 6.3.2.-) (p53-binding protein Mdm2) (Oncoprotein Mdm2) (Double minute 2 protein) (Hdm2).	68	0.00116821	0	1	1	1	1	Homologene group 1793	5	0	1	1	0	0	0	0	0	1	0	1	0	0	0	0	1	0	0
1427161_at	BE848253	Cenpf	centromere autoantigen F	1	0	1	1	0	0	1	1	1	6	49	70313.4	0.291667	0.0051838								1	1	Homologene group 22969	6	0	1	1	0	0	0	0	0	1	0	1	0	0	0	0	1	0	1
1416926_at	AW495711	Trp53inp1	transformation related protein 53 inducible nuclear protein 1	0	0	1	1	1	0	1	1	1	6	8	30708.9	0.107143	0.00522631								1	1	Homologene group 11065	6	0	1	1	0	0	0	0	0	1	0	1	0	0	0	0	1	0	1
1416313_at	NM_019914	AI839562	expressed sequence AI839562	1	0	1	1	1	0	1	1	0	6	3	25441.8	0.333333	0.00520823
1422479_at	NM_019811	Acas2	acetyl-Coenzyme A synthetase 2 (ADP forming)	1	1	1	1	1	0	1	0	0	6	4	4190	0	0.00508707
1425891_a_at	AF329833	Grtp1	GH regulated TBC protein 1	0	0	1	1	0	1	1	1	1	6	11	1899.81	0.138889	0.00520915								1	0	Homologene group 84592	10	1	0	0	1	1	0	1	1	1	0	1	1	0	0	1	1	0	1
1416067_at	NM_013562	Ifrd1	interferon-related developmental regulator 1	1	0	1	1	0	0	1	1	1	6	11	1399.87	0.666667	0.00520935								1	1	Homologene group 31043	8	1	1	0	1	0	0	1	0	1	0	1	0	0	0	0	1	0	1
1452540_a_at	M25487	Hist1h2bc /// Hist1h2be /// Hist1h2bl /// Hist1h2bm /// Hist1h2bp /// LOC432734	histone 1; H2bc /// histone 1; H2be /// histone 1; H2bl /// histone 1; H2bm /// histone 1; H2bp /// similar to Hist1h2bc protein	0	0	1	1	0	1	1	1	1	6	2	0	NA	0.000228467
1422776_at	NM_011459	Serpinb8	serine (or cysteine) proteinase inhibitor; clade B; member 8	1	0	0	1	1	0	1	1	1	6	1	0	NA	0.00519224								1	1	Homologene group 74445	4	0	1	1	0	0	0	0	0	1	0	0	0	0	0	0	1	0	0
1427005_at	BM234765	Plk2	polo-like kinase 2 (Drosophila)	0	0	0	1	1	1	1	1	1	6	1	0	NA	0.00519292								1	1	Homologene group 21317	6	0	1	1	0	0	0	0	0	1	0	1	0	0	0	0	1	0	1
1424674_at	BB825002	Slc39a6	solute carrier family 39 (metal ion transporter); member 6	1	0	1	0	1	1	1	0	1	6	1	0	NA	0.00518083								1	1	Homologene group 8199	6	0	1	1	0	0	0	0	0	1	0	1	0	0	0	0	1	0	1
1426516_a_at	AK014526	Lpin1	lipin 1	1	0	0	0	1	1	1	1	1	6												1	1	Homologene group 9266	9	1	1	1	0	0	0	0	0	1	0	1	0	1	0	0	1	1	1
1452864_at	BM022689	Med12l	mediator of RNA polymerase II transcription; subunit 12 homolog (yeast)-like	1	0	0	0	1	1	1	1	1	6												1
1416687_at	BC021352	Plod2	procollagen lysine; 2-oxoglutarate 5-dioxygenase 2	1	0	0	0	1	1	1	1	1	6												1	1	Homologene group 22681	6	0	1	1	0	0	0	0	0	1	0	1	0	0	0	0	1	0	1
1450165_at	NM_011408	Slfn2	schlafen 2	1	0	0	0	1	1	1	1	1	6													0	Homologene group 7945	2	0	0	1	0	0	0	0	0	1	0	0	0	0	0	0	1	0	0
1422837_at	NM_022886	Scel	sciellin	1	0	0	1	1	0	1	1	1	6												1	1	Homologene group 2850	4	0	0	1	0	0	0	0	0	1	0	1	0	0	0	0	1	0	0
1415940_at	NM_133349	AA407930	expressed sequence AA407930	1	0	0	1	0	1	1	1	1	6
1421408_at	NM_030691	Igsf6	immunoglobulin superfamily; member 6	0	0	0	1	1	1	1	1	1	6												1	0	Homologene group 36189	3	0	0	1	0	0	0	0	0	1	0	0	0	0	0	0	1	0	1
1418052_at	BC005606	Mvk	mevalonate kinase	1	0	0	1	1	1	1	0	1	6												1	1	Homologene group 372	13	1	1	0	0	1	1	0	0	1	1	1	1	1	1	1	0	1	1
1427559_a_at	M31629	Atf2	activating transcription factor 2	1	1	0	0	1	1	0	0	1	5	25	75345.9	0.21978	0.00523381	ATF2	Cyclic AMP-dependent transcription factor ATF-2 (Activating transcription factor 2) (cAMP response element-binding protein CRE- BP1) (HB16).	36	0.000421253	0	1	1	1	1	Homologene group 31061	7	0	1	1	1	0	0	1	0	1	0	1	0	0	0	0	0	0	1
1418991_at	NM_007523	Bak1	BCL2-antagonist/killer 1	1	0	1	1	1	0	0	0	1	5					BAK1	Bcl-2 homologous antagonist/killer (Apoptosis regulator BAK) (Bcl-2- like 7 protein).	25	4.71e-05	0	2	2	1	1	Homologene group 917	5	0	1	1	0	0	0	0	0	1	0	0	0	0	0	0	1	0	1
1416837_at	BC018228	Bax	Bcl2-associated X protein	1	0	0	1	1	1	0	0	1	5	63	19885.6	0.265766	0.00523226	BAX	Apoptosis regulator BAX, cytoplasmic isoform beta.	18	7.43e-06	0	1	1	1	1	Homologene group 7242	5	0	1	1	0	0	0	0	0	1	0	1	0	0	0	0	1	0	0
1440770_at	AI505544	Bcl2	B-cell leukemia/lymphoma 2	1	0	0	1	1	1	0	0	1	5					BCL2	Apoptosis regulator Bcl-2.	79	0.00158785	0	1	1	1	1	Homologene group 527	6	0	1	1	0	0	0	0	0	1	0	1	0	0	0	0	1	0	1
1453993_a_at	AK014659	Bnip2	BCL2/adenovirus E1B 19kDa-interacting protein 1; NIP2	0	0	1	1	1	1	0	0	1	5	26	31882.4	0.291667	0.00522088	BNIP2	BCL2/adenovirus E1B 19 kDa protein-interacting protein 2.	9	3.08e-05	0	1	1	1	1	Homologene group 3194	6	0	1	1	0	0	0	0	0	1	0	1	0	0	0	0	1	0	1
1424552_at	BC006737	Casp8	caspase 8	1	0	1	1	0	1	0	0	1	5	2	0	NA	0.00521846	CASP8	Caspase-8 precursor (EC 3.4.22.61) (CASP-8) (ICE-like apoptotic protease 5) (MORT1-associated CED-3 homolog) (MACH) (FADD-homologous ICE/CED-3-like protease) (FADD-like ICE) (FLICE) (Apoptotic cysteine protease) (Apoptotic protease Mch-5) (CAP4) [Contains: Caspase-8 subunit p18; Caspase-8 subunit p10].	81	0.000793294	0	1	1	1	1	Homologene group 7657	6	0	1	1	0	0	0	0	0	1	0	1	0	0	0	0	1	0	1
1418770_at	NM_013486	Cd2	CD2 antigen	1	0	0	1	1	1	0	0	1	5					CD2	T-cell surface antigen CD2 precursor (T-cell surface antigen T11/Leu- 5) (LFA-2) (LFA-3 receptor) (Erythrocyte receptor) (Rosette receptor).	18	0.000108457	0	1	1	1	1	Homologene group 1338	5	0	1	1	0	0	0	0	0	1	0	0	0	0	0	0	1	0	1
1424638_at	AK007630	Cdkn1a	cyclin-dependent kinase inhibitor 1A (P21)	1	0	1	1	1	1	0	0	0	5					CDKN1A	Cyclin-dependent kinase inhibitor 1 (p21) (CDK-interacting protein 1) (Melanoma differentiation-associated protein 6) (MDA-6).	91	0.00201839	0	2	2	1	1	Homologene group 333	4	0	1	1	0	0	0	0	0	1	0	0	0	0	0	0	1	0	0
1448346_at	NM_007687	Cfl1	cofilin 1; non-muscle	1	1	1	0	1	1	0	0	0	5	7	2222.25	0	0.00522075	CFL1	Cofilin-1 (Cofilin, non-muscle isoform) (18 kDa phosphoprotein) (p18).	24	0.000653115	0	1	1	1	1	Homologene group 99735	4	0	1	1	0	0	0	0	0	1	0	0	0	0	0	0	1	0	0
1415803_at	AF010586	Cx3cl1	chemokine (C-X3-C motif) ligand 1	1	0	0	1	1	1	0	0	1	5	12	5459.88	0.285714	0.00521985	CX3CL1	Fractalkine precursor (CX3CL1) (Neurotactin) (CX3C membrane-anchored chemokine) (Small-inducible cytokine D1) [Contains: Processed fractalkine].	1	0	0	1	1	1	0	Homologene group 2251	3	0	1	1	0	0	0	0	0	1	0	0	0	0	0	0	1	0	0
1427155_at	AK014510	Fchsd1	FCH and double SH3 domains 1	1	0	1	1	0	1	0	0	1	5	6	1057.94	0.333333	0.00518476	FCHSD1	FCH and double SH3 domains protein 1.	0	0	0	1	1	1	1	Homologene group 14127	5	0	1	1	0	0	0	0	0	1	0	0	0	0	0	0	1	0	1
1450212_at	NM_019679	Fmnl1	formin-like 1	1	0	0	1	1	1	0	0	1	5					FMNL1	Formin-like protein 1 (Leukocyte formin) (CLL-associated antigen KW- 13).	7	4.64e-06	0	1	1	1	1	Homologene group 55935	4	0	1	1	0	0	0	0	0	1	0	1	0	0	0	0	0	0	0
1448884_at	NM_026584	Gtf2e2	general transcription factor II E; polypeptide 2 (beta subunit)	1	0	0	1	1	1	0	0	1	5					GTF2E2	Transcription initiation factor IIE subunit beta (TFIIE-beta) (General transcription factor IIE subunit 2).	46	1.12e-05	0	1	1	1	1	Homologene group 37573	9	1	1	1	1	0	0	1	0	1	0	1	0	0	0	0	1	0	1
1415963_at	NM_019868	Hnrph2	heterogeneous nuclear ribonucleoprotein H2	1	1	0	0	1	1	0	0	1	5	5	1144.27	0.333333	0.00521971	HNRPH2	Heterogeneous nuclear ribonucleoprotein H' (hnRNP H') (FTP-3).	108	0	0	1	1
1420802_at	NM_008355	Il13	interleukin 13	1	0	0	1	1	1	0	0	1	5					IL13	Interleukin-13 precursor (IL-13).	5	0.000115581	0	1	1	1	1	Homologene group 1649	4	0	1	1	0	0	0	0	0	1	0	0	0	0	0	0	1	0	0
1418219_at	NM_008357	Il15	interleukin 15	1	0	1	0	1	0	0	1	1	5	4	2469.88	0	0.0051654	IL15	Interleukin-15 precursor (IL-15).	3	0	0	1	1	1	1	Homologene group 487	4	0	1	1	0	0	0	0	0	1	0	0	0	0	0	0	1	0	0
1417546_at	M28052	Il2rb	interleukin 2 receptor; beta chain	1	0	1	1	1	0	0	0	1	5	2	0	NA	0.000228467	IL2RB	Interleukin-2 receptor subunit beta precursor (IL-2 receptor) (P70-75) (p75) (High affinity IL-2 receptor subunit beta) (CD122 antigen).	26	9.09e-05	0	1	1	1	1	Homologene group 47955	3	0	1	0	0	0	0	0	0	1	0	0	0	0	0	0	1	0	0
1435560_at	BI554446	Itgal	Integrin alpha L	1	0	0	1	1	1	0	0	1	5	2	0	NA	0.00520156	ITGAL	Integrin alpha-L precursor (Leukocyte adhesion glycoprotein LFA-1 alpha chain) (LFA-1A) (Leukocyte function-associated molecule 1 alpha chain) (CD11a antigen).	7	1.91e-05	0	1	1	1	1	Homologene group 1666	4	0	1	1	0	0	0	0	0	1	0	0	0	0	0	0	1	0	0
[truncated: 5,507 more rows]
